# Supplementary material for: LMCT–homolysis-enabled C–H functionalization of arylamines
Source: Royal Society of Chemistry journal article supplement (doi:10.1039/d4qo02146k), 2024-12-30
Supplement: d4qo02146k1.pdf [file d4qo02146k1.pdf]

## Support Information

# LMCT-Homolysis-Enabled C–H Functionalization of Arylamines

Qiping He,<sup>a</sup> Wenxin Yan,<sup>b</sup> Xianglin Yu,<sup>a</sup> Xinxiang Huang,<sup>a</sup> Chang Liu,<sup>a</sup> Yinchun Jiao<sup>b\*</sup> and Yi Jin<sup>\*a</sup>

<sup>a</sup> Key Laboratory of Medicinal Chemistry for Natural Resource, Ministry of Education; Yunnan Key Laboratory of Research & Development for Natural Products; School of Pharmacy, Yunnan University, Kunming, 650091, P. R. China.

<sup>b</sup> School of Chemistry and Chemical Engineering; Key Laboratory of Theoretical Organic Chemistry and Functional Molecular, Ministry of Education, Hunan University of Science and Technology, Xiangtan, 411201, P. R. China;

E-mail: yinchunjiao@hnust.edu.cn; jinyi@ynu.edu.cn.

### Contents

|                                                                                                 |    |
|-------------------------------------------------------------------------------------------------|----|
| 1. General Considerations .....                                                                 | 1  |
| 2. General Procedure for preparing compounds <b>3,5,6,8,9,10</b> . ....                         | 2  |
| 3. Spectroscopic Data of <b>3,5,6,8,9,10</b> . ....                                             | 4  |
| 4. Mechanistic studies .....                                                                    | 24 |
| 5. Synthetic applications .....                                                                 | 29 |
| 6. X-ray Structure and Data .....                                                               | 34 |
| 7. <sup>1</sup> H NMR and <sup>13</sup> C NMR spectra of <b>3,5,6,8,9,10,11,12,13,15</b> . .... | 40 |
| 8. References .....                                                                             | 92 |

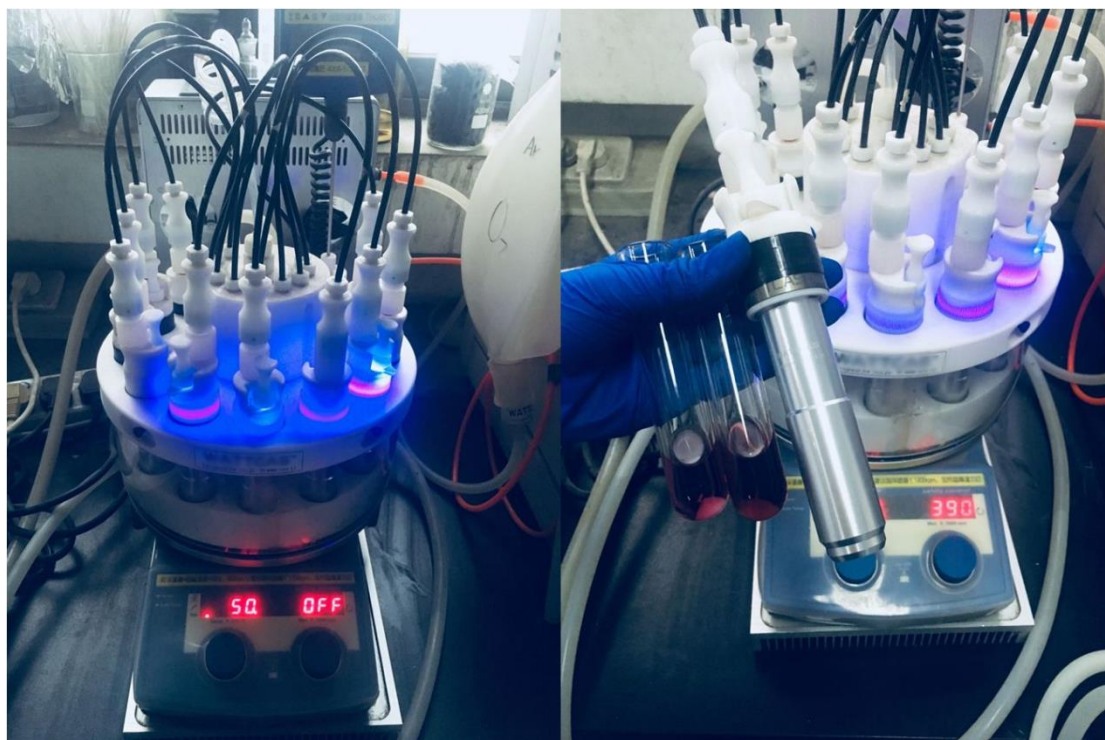

**Figure S1.** Details for the photochemical reaction setup.

The light Source and the Material of the Irradiation Vessel

Manufacturer: Xi'an WATTECS experimental equipment Co. Ltd

Model: WP-TEC-1020SL

Broadband source:  $\lambda = 460$  nm (light power: 42W).

Material of the irradiation vessel: borosilicate reaction tube (20 ml)

Distance from the light source to the irradiation vessel: 2.0 cm

Not use any filter

## 1. General Considerations

All chemicals and reagents were used of commercial grade and were used without no further purification. The reactions were monitored by thin-layer chromatography (TLC) using silica gel GF254. Column chromatography was performed with 200–300 mesh silica gel. All yields refer to isolated products after purification. The intermediates and the products synthesized were fully characterized by spectroscopic data. The NMR spectra were recorded on Bruker DRX-600 ( $^1\text{H}$ : 600 MHz,  $^{13}\text{C}$ : 150 MHz) 、 Bruker DRX-500 ( $^1\text{H}$ : 500 MHz,  $^{13}\text{C}$ : 125 MHz) or Bruker DRX-400 ( $^1\text{H}$ : 400 MHz,  $^{13}\text{C}$ : 100 MHz) using Acetone- $d_6$ , DMSO and  $\text{CDCl}_3$  as solvents. The following abbreviation were used to explain the multiplicities: (s) = singlet, (d) = doublet, (t) = triplet, (q) = quartet, (sept) = septuplet, (dd) = double doublet, (dt) = double triplet, (dq) = double quartet, (ddd) = double-double doublet, (m) = multiplet; Chemical shifts ( $\delta$ ) are expressed in parts per million (ppm) and  $J$  values are given in hertz (Hz). IR spectra were recorded on an FT-IR Thermo Nicolet Avatar 360 using a KBr pellet. HRMS was performed on an Agilent LC/MSD TOF instrument. The melting points were measured by the XT-4A melting point apparatus without correction.

## 2. General Procedure for preparing compounds **3,5,6,8,9,10**.

### General Procedure 1 for preparing asymmetric oxides **3**.

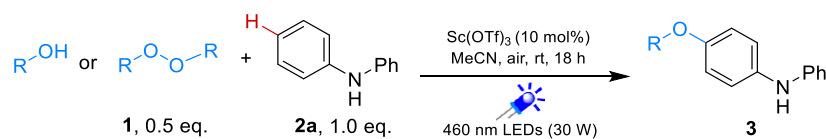

Under air atmosphere, eroxybenzoyl and phenol and benzyl alcohol **1** (0.05 mmol, 0.5 equiv), arylamine **2a** (0.1 mmol, 1.0 equiv),  $Sc(OTf)_3$  (10 mol%, 0.01mmol) in MeCN (1.0 mL, 0.1 M) were added to 20.0 mL reaction tube(parallel three samples). The mixture was stirred at 460 nm light-emitting diodes (LEDs, 30 W) and monitored by TLC. After stirring for 18h. Then, the reaction was quenched with saturated NaCl solution and extracted with 20.0 mL EtOAc for three times. The organic layers were combined, dried over  $Na_2SO_4$ , filtered and evaporated under reduced pressure. The residues were purified by flash column chromatography on silica gel to provide the products. The products were further identified by FTIR spectroscopy, NMR spectroscopy, and HRMS.

### General Procedure 2 for preparing unsymmetrical sulfides **5,6**.

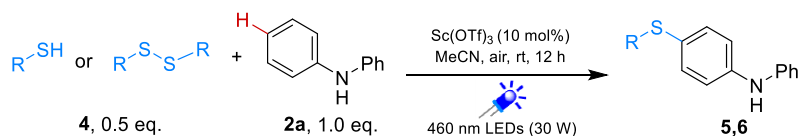

Under air atmosphere, dithioether **4** (0.05 mmol, 0.5 equiv) or thiole (0.1 mmol, 1.0 equiv), arylamine **2** (0.1 mmol, 1.0 equiv),  $Sc(OTf)_3$  (10 mol%, 0.01mmol) in MeCN (1.0 mL, 0.1 M) were added to 20.0 mL reaction tube(parallel three samples). The mixture was stirred at 460 nm light-emitting diodes (LEDs, 30W) and monitored by TLC. After stirring for 12 h. Then, the reaction was quenched with saturated NaCl solution and extracted with 20.0 mL EtOAc for three times. The organic layers were combined, dried over  $Na_2SO_4$ , filtered and evaporated under reduced pressure. The residues were purified by flash column chromatography on silica gel to provide the



products. The products were further identified by FTIR spectroscopy, NMR spectroscopy, and HRMS.

General Procedure 3 for preparing unsymmetrical selenides **8, 9**.

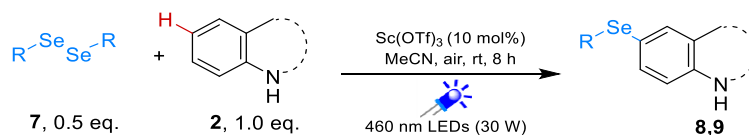

Under air atmosphere, diselenide **7** (0.05 mmol, 0.5 equiv), arylamine **2** (0.1 mmol, 1.0 equiv), Sc(OTf)<sub>3</sub> (10 mol%, 0.01mmol) in MeCN (1.0 mL, 0.1 M) were added to 20.0 mL reaction tube(parallel three samples). The mixture was stirred at 460 nm light-emitting diodes (LEDs, 30 W) and monitored by TLC. After stirring for 8h. Then, the reaction was quenched with saturated NaCl solution and extracted with 20.0 mL EtOAc for three times. The organic layers were combined, dried over Na<sub>2</sub>SO<sub>4</sub>, filtered and evaporated under reduced pressure. The residues were purified by flash column chromatography on silica gel to provide the products. The products were further identified by FTIR spectroscopy, NMR spectroscopy, and HRMS .

General Procedure 4 for preparing asymmetric oxides **10**.

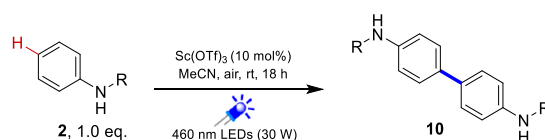

Under air atmosphere, arylamine **2** (0.1 mmol, 1.0 equiv), Sc(OTf)<sub>3</sub> (10 mol%, 0.01mmol) in MeCN (1.0 mL, 0.1 M) were added to 20.0 mL reaction tube(parallel three samples). The mixture was stirred at 460 nm light-emitting diodes (LEDs, 30 W) and monitored by TLC. After stirring for 18 h. Then, the reaction was quenched with saturated NaCl solution and extracted with 20.0 mL EtOAc for three times. The organic layers were combined, dried over Na<sub>2</sub>SO<sub>4</sub>, filtered and evaporated under reduced pressure. The residues were purified by flash column chromatography on silica gel to provide the products. The products were further identified by FTIR spectroscopy, NMR spectroscopy, and HRMS.

### 3. Spectroscopic Data of **3,5,6,8,9,10**.

#### Spectroscopic Data of **(3a)**

##### *4-(phenylamino)phenyl benzoate*

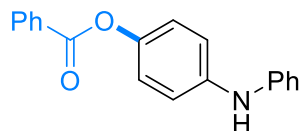

Synthesized according to General Procedure 1. the obtained product was a yellow solid(46%yield, 40mg, VPetroleum ether/VEthyl acetate = 50:1, R<sub>f</sub> = 0.4); Mp:96-98°C; IR(KBr): 3373, 1724, 1597, 1518, 1493, 1325, 1273, 1196, 1067, 642cm<sup>-1</sup>; <sup>1</sup>H NMR (400 MHz, Chloroform-d) δ 8.17 – 8.10 (m, 2H), 7.60 – 7.54 (m, 1H), 7.45 (dd, *J* = 8.4, 2H), 7.24 – 7.19 (m, 2H), 7.09 – 6.97 (m, 6H), 6.87 (t, *J* = 7.3, 1H), 5.65 (s, 1H); <sup>13</sup>C NMR (100 MHz, Chloroform-d) δ 164.5, 143.8, 142.2, 139.9, 132.5, 129.1, 128.6, 128.4, 127.5, 121.4, 120.0, 117.8, 116.6; HRMS (TOF-ESI<sup>+</sup>): *m/z* calcd for C<sub>19</sub>H<sub>15</sub>NO<sub>2</sub> [M+Na]<sup>+</sup>, 312.0095; found: 312.0094.

Data consistent with those previously reported.<sup>1</sup>

#### Spectroscopic Data of **(3b)**

##### *4-(phenylamino)phenyl 3-chlorobenzoate*

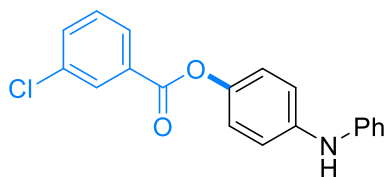

Synthesized according to General Procedure 1. the obtained product was a yellow solid(60%yield, 58mg, VPetroleum ether/VEthyl acetate = 70:1, R<sub>f</sub> = 0.4); Mp:99-100°C; IR(KBr): 3366, 1587, 1488, 1425, 1278, 1169, 1073, 692cm<sup>-1</sup>; <sup>1</sup>H NMR (400 MHz, Chloroform-d) δ 8.06 – 7.93 (m, 2H), 7.56 (dd, *J* = 8.1Hz, 1H), 7.48 – 6.69 (m, 10H), 5.38 (s, 1H).; <sup>13</sup>C NMR (100 MHz, Chloroform-d) δ 162.6, 141.5, 133.8, 132.8, 129.2,

128.9, 128.3, 127.3, 125.8, 121.8, 120.7, 120.6, 118.3, 117.6.; **HRMS** (TOF-ESI+):  $m/z$  calcd for  $C_{19}H_{15}ClNO_2$   $[M+H]^+$ , 324.0786; found: 324.0788.

### Spectroscopic Data of (3c)

#### 4-(4-methoxyphenoxy)-N-phenylaniline

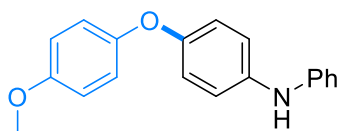

Synthesized according to General Procedure 1. The obtained product was a colourful solid (43% yield, 38mg,  $V_{\text{Petroleum ether}}/V_{\text{Ethyl acetate}} = 20:1$ ,  $R_f = 0.4$ ); **MP**: 83-85°C; **IR** (KBr): 3354, 1745, 1647, 1439, 1316, 1215, 1057, 687  $cm^{-1}$ ; **<sup>1</sup>H NMR** (400 MHz, Chloroform-*d*)  $\delta$  7.17 (m, 2H), 7.07 – 6.53 (m, 11H), 5.51 (s, 1H), 3.73 (s, 3H); **<sup>13</sup>C NMR** (100 MHz, Chloroform-*d*)  $\delta$  154.5, 151.8, 150.1, 143.2, 136.9, 128.3, 120.8, 119.8, 119.2, 118.9, 118.1, 115.4, 113.8, 54.6; **HRMS** (TOF-ESI+):  $m/z$  calcd for  $C_{19}H_{18}NO_2$   $[M+H]^+$ , 292.1332; found: 292.1331.

### Spectroscopic Data of (3d)

#### 4-(2,6-di-tert-butyl-4-methylphenoxy)-N-phenylaniline

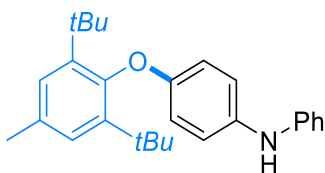

Synthesized according to General Procedure 1. The obtained product was a white oil (57% yield, 66mg,  $V_{\text{Petroleum ether}}/V_{\text{Ethyl acetate}} = 20:1$ ,  $R_f = 0.4$ ); **IR** (KBr): 3271, 1754, 1628, 1481, 1316, 1254, 1172, 1051, 635  $cm^{-1}$ ; **<sup>1</sup>H NMR** (400 MHz, Chloroform-*d*)  $\delta$  7.21 – 7.16 (m, 2H), 7.07 – 7.03 (m, 2H), 7.01 – 6.97 (m, 2H), 6.95 – 6.92 (m, 2H), 6.88 – 6.83 (m, 1H), 6.49 (s, 2H), 5.63 (s, 1H), 1.34 (s, 3H), 1.16 (s, 18H); **<sup>13</sup>C NMR** (100 MHz, Chloroform-*d*)  $\delta$  146.1, 143.3, 141.7, 141.0, 133.0, 128.3, 126.2, 120.2,

117.0, 116.6, 33.6, 28.5, 23.9; **HRMS** (TOF-ESI<sup>+</sup>): m/z calcd for C<sub>27</sub>H<sub>34</sub>NO [M+H]<sup>+</sup>, 388.2629. found: 388.2635.

### Spectroscopic Data of (3e)

#### 4-(2-(tert-butyl)-4,6-dimethylphenoxy)-N-phenylaniline

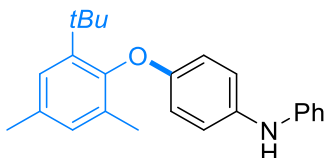

Synthesized according to General Procedure 1. The obtained product was a white oil (46% yield, 48 mg, V<sub>Petroleum ether</sub>/V<sub>Ethyl acetate</sub> = 50:1, R<sub>f</sub> = 0.4); **IR** (KBr): 3264, 1732, 1625, 1473, 1324, 1256, 1172, 1041, 655 cm<sup>-1</sup>; **<sup>1</sup>H NMR** (400 MHz, Chloroform-*d*) δ 7.19 (d, *J* = 7.3 Hz, 2H), 7.07 (d, *J* = 8.7 Hz, 2H), 7.02 – 6.81 (m, 5H), 6.61 (d, *J* = 3.0 Hz, 1H), 6.54 (s, 1H), 5.65 (s, 1H), 1.82 (s, 3H), 1.53 (s, 3H), 1.18 (s, 9H); **<sup>13</sup>C NMR** (100 MHz, Chloroform-*d*) δ 148.5, 148.1, 142.1, 141.7, 141.2, 132.5, 132.5, 128.3, 128.3, 126.2, 120.2, 117.0, 116.6, 33.5, 28.3, 23.6, 15.4; **HRMS** (TOF-ESI<sup>+</sup>): m/z calcd for C<sub>24</sub>H<sub>28</sub>NO [M+H]<sup>+</sup>, 346.2165.; found: 346.2166.

### Spectroscopic Data of (3f)

#### 4-(naphthalen-1-yloxy)-N-phenylaniline

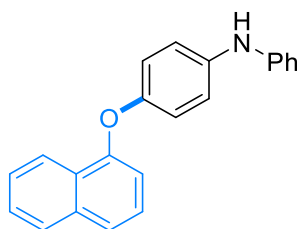

Synthesized according to General Procedure 1. The obtained product was a purple solid (41% yield, 38 mg, V<sub>Petroleum ether</sub>/V<sub>Ethyl acetate</sub> = 10:1, R<sub>f</sub> = 0.4); **MP**: 188–190 °C; **IR** (KBr): 3652, 2234, 1842, 1663, 1527, 1342, 1264, 1165, 1051, 672 cm<sup>-1</sup>; **<sup>1</sup>H NMR** (400 MHz, Chloroform-*d*) δ 8.13 – 8.07 (m, 1H), 8.06 – 7.99 (m, 1H), 7.73 – 7.63 (m, 2H), 7.52 – 7.45 (m, 2H), 7.29 – 7.23 (m, 2H), 7.17 – 7.07 (m, 3H), 7.08 – 6.87 (m, 5H), 5.93 (s, 1H); **<sup>13</sup>C NMR** (100 MHz, Chloroform-*d*) δ 146.2, 144.7, 140.3,

132.7, 132.6, 131.6, 131.2, 130.1, 128.5, 125.9, 124.8, 123.6, 121.6, 118.7, 114.7;  
**HRMS** (TOF-ESI+): m/z calcd for C<sub>22</sub>H<sub>17</sub>NO [M+H]<sup>+</sup>, 312.1383; found:312.1385.

#### Spectroscopic Data of **(5a)**

*N*-phenyl-4-(*p*-tolylthio)aniline

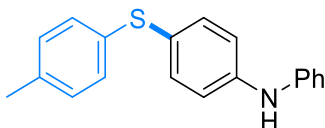

Synthesized according to General Procedure 2. The obtained product was a brown oil(66%yield, 57mg, V<sub>Petroleum ether</sub>/V<sub>Ethyl acetate</sub> = 500:1, R<sub>f</sub> = 0.3); **IR**(KBr): 3435, 2997, 2655, 2414, 1670, 1021, 796, 722, 621cm<sup>-1</sup>; **<sup>1</sup>H NMR** (400 MHz, Chloroform-d) δ 7.33 – 7.14 (m, 4H), 7.14 – 7.06 (m, 2H), 7.06 – 6.96 (m, 4H), 6.96 – 6.85 (m, 3H), 5.69 (s, 1H), 2.23 (s, 3H); **<sup>13</sup>C NMR** (100 MHz, Chloroform-d) δ 143.2, 142.3, 136.1, 134.4, 134.2, 129.8, 129.4, 129.4, 125.1, 121.8, 118.6, 117.7, 21.0; **HRMS** (TOF-ESI+): m/z calcd for C<sub>19</sub>H<sub>18</sub>NS [M+H]<sup>+</sup>, 292.1154; found, 292.1156.

#### Spectroscopic Data of **(5b)**

4-((4-methoxyphenyl)thio)-*N*-phenylaniline

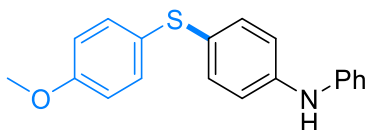

Synthesized according to General Procedure 2. The obtained product was a white solid(67%yield, 61mg, V<sub>Petroleum ether</sub>/V<sub>Ethyl acetate</sub> = 100:1, R<sub>f</sub> = 0.3); **Mp**:54-55°C; **IR**(KBr): 3395, 3056, 2975, 1929, 1591, 1497, 1315, 1039, 804, 746, 555cm<sup>-1</sup>; **<sup>1</sup>H NMR** (400 MHz, Chloroform-d) δ 7.30 – 7.10 (m, 6H), 7.04 – 6.95 (m, 2H), 6.95 – 6.82 (m, 3H), 6.82 – 6.68 (m, 2H), 5.64 (s, 1H), 3.71 (s, 3H); **<sup>13</sup>C NMR** (100 MHz, Chloroform-d) δ 159.0, 142.5, 142.5, 132.8, 132.6, 129.4, 127.4, 127.2, 121.5, 118.3, 118.0, 114.8, 55.4; **HRMS** (TOF-ESI+): m/z calcd for C<sub>19</sub>H<sub>18</sub>NOS [M+H]<sup>+</sup>, 308.1104; found, 308.1104.

### Spectroscopic Data of (5c)

#### 4-((4-fluorophenyl)thio)-N-phenylaniline

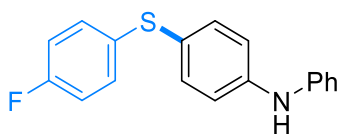

Synthesized according to General Procedure 2. The obtained product was a white oil (43% yield, 39 mg,  $V_{\text{Petroleum ether}}/V_{\text{Ethyl acetate}} = 500:1$ ,  $R_f = 0.3$ ); **IR** (KBr): 3516, 3188, 2962, 2423, 2258, 1927, 1669, 1026, 750, 648,  $561\text{cm}^{-1}$ ;  **$^1\text{H NMR}$**  (400 MHz, Chloroform- $d$ )  $\delta$  7.60 – 7.08 (m, 7H), 7.08 – 6.97 (m, 2H), 6.97 – 6.86 (m, 4H), 5.72 (s, 1H);  **$^{13}\text{C NMR}$**  (100 MHz, Chloroform- $d$ )  $\delta$  160.5 ( $J_{\text{C-F}} = 254\text{ Hz}$ ), 142.6, 141.0, 133.4, 129.9 (d,  $J = 9\text{ Hz}$ ), 128.4, 123.4, 120.9, 117.8, 116.6, 115.9 ( $J = 22\text{ Hz}$ );  **$^{19}\text{F NMR}$**  (376 MHz, Chloroform- $d$ )  $\delta$  -116.29  $\text{cm}^{-1}$ ; **HRMS** (TOF-ESI $^+$ ):  $m/z$  calcd for  $\text{C}_{18}\text{H}_{15}\text{FN}$   $[\text{M}+\text{H}]^+$ , 296.0904; found, 296.0905.

### Spectroscopic Data of (5d)

#### N-phenyl-4-(*m*-tolylthio)aniline

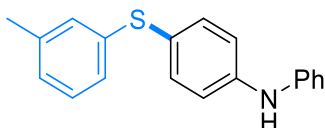

Synthesized according to General Procedure 2. The obtained product was a brown oil (68% yield, 60 mg,  $V_{\text{Petroleum ether}}/V_{\text{Ethyl acetate}} = 500:1$ ,  $R_f = 0.3$ ); **IR** (KBr): 3388, 2999, 2543, 2222, 2052, 1927, 1635, 1136, 735, 639,  $559\text{cm}^{-1}$ ;  **$^1\text{H NMR}$**  (400 MHz, Chloroform- $d$ )  $\delta$  7.70 – 7.14 (m, 5H), 7.16 – 7.01 (m, 3H), 7.01 – 6.80 (m, 5H), 5.72 (s, 1H), 2.21 (s, 3H);  **$^{13}\text{C NMR}$**  (100 MHz, Chloroform- $d$ )  $\delta$  143.6, 142.1, 138.8, 138.3, 135.0, 129.4, 129.0, 128.8, 126.7, 125.5, 123.9, 121.9, 118.8, 117.6, 21.4; **HRMS** (TOF-ESI $^+$ ):  $m/z$  calcd for  $\text{C}_{19}\text{H}_{18}\text{NS}$   $[\text{M}+\text{H}]^+$ , 292.1154; found, 292.1156.

### Spectroscopic Data of (5e)

#### 4-((3-bromophenyl)thio)-N-phenylaniline

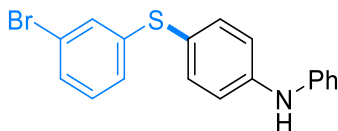

Synthesized according to General Procedure 2. The obtained product was a brown oil (44% yield, 45 mg,  $V_{\text{Petroleum ether}}/V_{\text{Ethyl acetate}} = 500:1$ ,  $R_f = 0.3$ ); **IR** (KBr): 3348, 3192, 2751, 2512, 1927, 1504, 1017, 753, 630,  $560\text{cm}^{-1}$ ;  **$^1\text{H NMR}$**  (400 MHz, Chloroform-d)  $\delta$  7.49 – 7.21 (m, 4H), 7.21 – 7.12 (m, 3H), 7.10 – 7.05 (m, 2H), 7.05 – 6.90 (m, 4H), 5.79 (s, 1H);  **$^{13}\text{C NMR}$**  (100 MHz, Chloroform-d)  $\delta$  143.4, 140.8, 140.6, 135.0, 129.1, 128.7, 128.4, 127.4, 124.8, 121.9, 121.3, 120.4, 118.3, 116.3; **HRMS** (TOF-ESI+):  $m/z$  calcd for  $\text{C}_{18}\text{H}_{15}\text{BrNS}$   $[\text{M}+\text{H}]^+$ , 356.0103; found, 356.0100.

#### Spectroscopic Data of **(5f)**

*N*-phenyl-4-(*o*-tolylthio)aniline

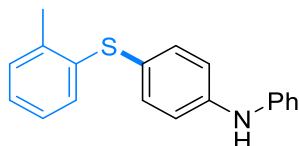

Synthesized according to General Procedure 2. The obtained product was a brown oil (63% yield, 55 mg,  $V_{\text{Petroleum ether}}/V_{\text{Ethyl acetate}} = 500:1$ ,  $R_f = 0.3$ ); **IR** (KBr): 3465, 3056, 2535, 2049, 1927, 1595, 1099, 755, 604,  $553\text{cm}^{-1}$ ;  **$^1\text{H NMR}$**  (400 MHz, Chloroform-d)  $\delta$  7.54 – 7.13 (m, 5H), 7.14 – 7.06 (m, 1H), 7.06 – 6.82 (m, 7H), 5.71 (s, 1H);  **$^{13}\text{C NMR}$**  (100 MHz, Chloroform-d)  $\delta$  142.3, 141.2, 136.2, 135.9, 133.4, 129.2, 128.4, 127.9, 125.4, 125.0, 122.7, 120.8, 117.7, 116.8, 19.3; **HRMS** (TOF-ESI+):  $m/z$  calcd for  $\text{C}_{19}\text{H}_{18}\text{NS}$   $[\text{M}+\text{H}]^+$ , 292.1154; found, 292.1156.

#### Spectroscopic Data of **(5g)**

*4*-((2-aminophenyl)thio)-*N*-phenylaniline

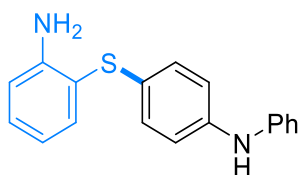

Synthesized according to General Procedure 2. The obtained product was a purple oil (66% yield, 58mg,  $V_{\text{Petroleum ether}}/V_{\text{Ethyl acetate}} = 500:1$ ,  $R_f = 0.3$ ); **IR**(KBr): 3500, 3143, 2648, 2254, 1607, 1159, 789, 604, 501  $\text{cm}^{-1}$ ;  **$^1\text{H}$  NMR** (400 MHz, Chloroform- $d$ )  $\delta$  7.34 (dd,  $J = 7.7, 1.6$  Hz, 1H), 7.19 – 7.06 (m, 3H), 7.06 – 6.98 (m, 2H), 6.98 – 6.91 (m, 2H), 6.92 – 6.76 (m, 3H), 6.67 (m, 2H), 5.59 (s, 1H), 4.21 (s, 2H);  **$^{13}\text{C}$  NMR** (100 MHz, Chloroform- $d$ )  $\delta$  147.0, 141.8, 140.6, 135.3, 129.4, 128.5, 128.3, 125.9, 120.2, 117.7, 117.5, 116.9, 115.6, 114.3; **HRMS** (TOF-ESI $^+$ ):  $m/z$  calcd for  $\text{C}_{18}\text{H}_{17}\text{N}_2\text{S}$   $[\text{M}+\text{H}]^+$ , 293.1107; found, 293.1110.

#### Spectroscopic Data of (**5h**)

##### *4-((4,5-dihydrothiazol-2-yl)thio)-N-phenylaniline*

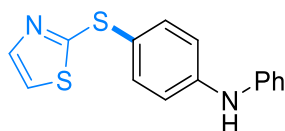

Synthesized according to General Procedure 2. The obtained product was a white solid; (56% yield, 48mg,  $V_{\text{Petroleum ether}}/V_{\text{Ethyl acetate}} = 20:1$ ,  $R_f = 0.4$ ); **Mp**: 140-141  $^{\circ}\text{C}$ ; **IR**(KBr): 3430, 2968, 2542, 2246, 1926, 1590, 1126, 922, 798, 644, 562  $\text{cm}^{-1}$ ;  **$^1\text{H}$  NMR** (400 MHz, DMSO- $d_6$ )  $\delta$  8.65 (s, 1H), 7.69 (d,  $J = 3.4$  Hz, 1H), 7.59 – 7.45 (m, 3H), 7.37 – 7.25 (m, 2H), 7.16 (td,  $J = 8.6, 1.7$  Hz, 4H), 6.95 (tt,  $J = 7.3, 1.2$  Hz, 1H);  **$^{13}\text{C}$  NMR** (100 MHz, DMSO- $d_6$ )  $\delta$  169.4, 146.7, 143.8, 142.2, 137.1, 129.8, 121.9, 121.0, 119.2, 117.7, 116.8; **HRMS** (TOF-ESI $^+$ ):  $m/z$  calcd for  $\text{C}_{15}\text{H}_{13}\text{N}_2\text{S}_2$   $[\text{M}+\text{H}]^+$ , 285.0515; found, 285.0516.

#### Spectroscopic Data of (**5i**)

##### *4-(benzo[d]thiazol-2-ylthio)-N-phenylaniline*

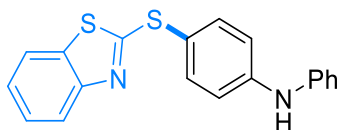



Synthesized according to General Procedure 2. The obtained product was a pale yellow solid; (42%yield, 42mg,  $V_{\text{Petroleum ether}}/V_{\text{Ethyl acetate}} = 20:1$ ,  $R_f = 0.4$ ); **Mp**:102-103°C; **IR**(KBr): 3474, 3317, 2765, 2545, 2249, 1928, 1566, 1035, 788, 633  $\text{cm}^{-1}$ ;  $^1\text{H NMR}$  (400 MHz, Chloroform-*d*)  $\delta$  7.86 (dd,  $J = 8.1, 0.9$  Hz, 1H), 7.69 – 7.62 (m, 1H), 7.63 – 7.53 (m, 2H), 7.46 – 7.27 (m, 3H), 7.26 – 7.15 (m, 3H), 7.15 – 6.94 (m, 3H), 6.01 (s, 1H);  $^{13}\text{C NMR}$  (100 MHz, Chloroform-*d*)  $\delta$  153.2, 145.3, 140.0, 136.5, 134.4, 128.5, 125.0, 123.0, 122.0, 120.7, 119.7, 119.1, 117.3, 115.7; **HRMS** (TOF-ESI+):  $m/z$  calcd for  $\text{C}_{19}\text{H}_{15}\text{N}_2\text{S}_2[\text{M}+\text{H}]^+$ , 335.0671; found, 335.0672.

#### Spectroscopic Data of (6a)

##### *N*-phenyl-4-(phenylthio)aniline

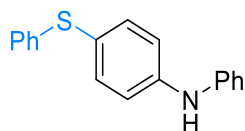

Synthesized according to General Procedure 2. The obtained product was a brown oil(47%yield, 39mg,  $V_{\text{Petroleum ether}}/V_{\text{Ethyl acetate}} = 500:1$ ,  $R_f = 0.3$ ); **IR**(KBr): 3461, 2977, 2419, 1928, 1650, 1271, 1040, 885, 740, 688  $\text{cm}^{-1}$ ;  $^1\text{H NMR}$  (400 MHz, Chloroform-*d*)  $\delta$  7.54 – 7.04 (m, 11H), 7.03 – 6.83 (m, 3H), 5.77 (s, 1H);  $^{13}\text{C NMR}$  (100 MHz, Chloroform-*d*)  $\delta$  142.7, 141.0, 137.7, 134.2, 128.4, 127.9, 127.1, 124.7, 122.4, 120.9, 117.9, 116.5; **HRMS** (TOF-ESI+):  $m/z$  calcd for  $\text{C}_{18}\text{H}_{16}\text{NS}[\text{M}+\text{H}]^+$ , 278.0098; found, 278.0098.

#### Spectroscopic Data of (6b)

##### 6-(phenylthio)-1,2,3,4-tetrahydroquinoline

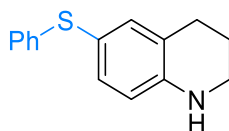

Synthesized according to General Procedure 2. The obtained product was a yellow oil(43%yield, 33mg,  $V_{\text{Petroleum ether}}/V_{\text{Ethyl acetate}} = 500:1$ ,  $R_f = 0.3$ ); **IR**(KBr): 3305, 3033,

2970, 2415, 2139, 1927, 1478, 1013, 736, 634, 551 $\text{cm}^{-1}$ ;  **$^1\text{H}$  NMR** (400 MHz, Chloroform- $d$ )  $\delta$  7.19 (s, 1H), 7.13 (t,  $J$  = 7.6 Hz, 2H), 7.08 – 6.85 (m, 4H), 6.59 – 6.18 (m, 1H), 3.95 (s, 1H), 3.43 – 3.12 (m, 2H), 2.67 (t,  $J$  = 6.4 Hz, 2H), 1.87 (p,  $J$  = 6.1 Hz, 2H);  **$^{13}\text{C}$  NMR** (100 MHz, Chloroform- $d$ )  $\delta$  144.4, 139.4, 135.4, 133.0, 127.7, 125.7, 123.8, 121.2, 116.4, 113.6, 40.8, 25.8, 20.6; **HRMS** (TOF-ESI $^+$ ):  $m/z$  calcd for  $\text{C}_{15}\text{H}_{16}\text{NS}$   $[\text{M}+\text{H}]^+$ , 242.0998; found, 242.0993.

#### Spectroscopic Data of (6c)

##### *3-(phenylthio)-1H-indole*

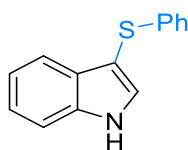

Synthesized according to General Procedure 2. The obtained product was a white solid (42% yield, 27mg,  $V_{\text{Petroleum ether}}/V_{\text{Ethyl acetate}} = 50:1$ ,  $R_f = 0.4$ ); **Mp**: 156-157 $^{\circ}\text{C}$ ; **IR**(KBr): 3452, 3021, 1436, 1404, 1332, 1322, 1278, 751, 698 $\text{cm}^{-1}$ ;  **$^1\text{H}$  NMR** (400 MHz, Chloroform- $d$ )  $\delta$  8.36 (s, 1H), 7.58 – 7.50 (m, 1H), 7.43 (d,  $J$  = 2.6 Hz, 1H), 7.38 (dd,  $J$  = 8.1, 1.0 Hz, 1H), 7.24 – 7.19 (m, 1H), 7.12 – 7.06 (m, 3H), 7.05 – 6.96 (m, 3H);  **$^{13}\text{C}$  NMR** (100 MHz, Chloroform- $d$ )  $\delta$  138.2, 135.4, 129.6, 128.0, 127.6, 124.8, 123.7, 122.0, 119.9, 118.6, 110.5, 101.8; Data consistent with those previously reported.<sup>2</sup>

#### Spectroscopic Data of (6d)

##### *phenyl(2,4,6-trimethoxyphenyl)sulfane*

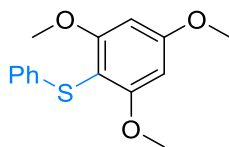

Synthesized according to General Procedure 2. The obtained product was a white solid (38% yield, 30mg,  $V_{\text{Petroleum ether}}/V_{\text{Ethyl acetate}} = 50:1$ ,  $R_f = 0.5$ ); **Mp**: 122-123 $^{\circ}\text{C}$ ; **IR**(KBr): 3011, 2941, 2839, 1738, 1576, 1454, 1339, 1228, 1185, 1093, 1022, 742, 653 $\text{cm}^{-1}$ ;  **$^1\text{H}$  NMR** (400 MHz, Chloroform- $d$ )  $\delta$  7.09 (dd,  $J$  = 8.7, 6.7 Hz, 2H), 6.96 (td,

$J = 7.3, 1.4$  Hz, 3H), 6.15 (s, 2H), 3.81 (s, 3H), 3.74 (s, 6H);  $^{13}\text{C}$  NMR (100 MHz, Chloroform-d)  $\delta$  161.9, 161.5, 137.6, 127.5, 124.6, 123.3, 97.5, 90.1, 55.3, 54.4. Data consistent with those previously reported.<sup>3</sup>

#### Spectroscopic Data of (8a)

*N*-phenyl-4-(phenylselanyl)aniline

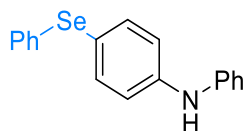

Synthesized according to General Procedure 3. The obtained product was a brown oil (83% yield, 81 mg,  $V_{\text{Petroleum ether}}/V_{\text{Ethyl acetate}} = 500:1$ ,  $R_f = 0.3$ ); IR (KBr): 3522, 3238, 2542, 2259, 1926, 1584, 1038, 716,  $640\text{cm}^{-1}$ ;  $^1\text{H}$  NMR (400 MHz, Chloroform-d)  $\delta$  7.38 (d,  $J = 8.6$  Hz, 2H), 7.32 – 7.08 (m, 7H), 7.06 – 6.99 (m, 2H), 6.91 (d,  $J = 8.6$  Hz, 3H), 5.69 (s, 1H);  $^{13}\text{C}$  NMR (100 MHz, Chloroform-d)  $\delta$  142.6, 141.1, 135.4, 132.3, 129.8, 128.4, 128.1, 125.4, 120.8, 118.3, 117.8, 116.7; HRMS (TOF-ESI+):  $m/z$  calcd for  $\text{C}_{18}\text{H}_{16}\text{NSe}$   $[\text{M}+\text{H}]^+$ , 326.0442; found, 326.0441.

#### Spectroscopic Data of (8b)

*N*-methyl-4-(phenylselanyl)aniline

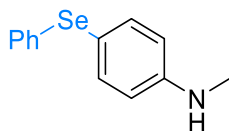

Synthesized according to General Procedure 3. The obtained product was a brown oil (86% yield, 69 mg,  $V_{\text{Petroleum ether}}/V_{\text{Ethyl acetate}} = 200:1$ ,  $R_f = 0.4$ ); IR (KBr): 3420, 2925, 1595, 1503, 1317, 1181,  $745\text{cm}^{-1}$ ;  $^1\text{H}$  NMR (400 MHz, Chloroform-d)  $\delta$  7.41 – 7.34 (m, 2H), 7.24 – 7.02 (m, 5H), 6.50 (d,  $J = 8.6$  Hz, 2H), 3.80 (s, 1H), 2.78 (s, 3H);  $^{13}\text{C}$  NMR (100 MHz, Chloroform-d)  $\delta$  148.5, 136.3, 133.5, 128.7, 128.0, 124.8, 113.5, 112.2, 29.5; Data consistent with those previously reported.<sup>4</sup>

#### Spectroscopic Data of (8c)

*N*,2-dimethyl-4-(phenylselanyl)aniline

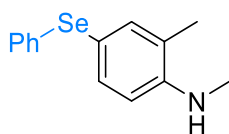

Synthesized according to General Procedure 3. The obtained product was a yellow oil (76% yield, 63mg,  $V_{\text{Petroleum ether}}/V_{\text{Ethyl acetate}} = 200:1$ ,  $R_f = 0.4$ ); **IR**(KBr): 3420, 2925, 1595, 1503, 1317, 1181, 745 $\text{cm}^{-1}$ ;  **$^1\text{H NMR}$**  (400 MHz, Chloroform- $d$ )  $\delta$  7.35 (dd,  $J = 8.3, 2.1$  Hz, 1H), 7.25 (d,  $J = 1.2$  Hz, 1H), 7.23 – 7.14 (m, 2H), 7.14 – 7.00 (m, 3H), 6.48 (d,  $J = 8.3$  Hz, 1H), 3.63 (s, 1H), 2.83 (s, 3H), 2.02 (s, 3H);  **$^{13}\text{C NMR}$**  (100 MHz, Chloroform- $d$ )  $\delta$  147.7, 137.7, 135.5, 134.8, 129.7, 129.0, 125.8, 123.0, 114.0, 109.9, 30.6, 17.2; **HRMS** (TOF-ESI $^+$ ):  $m/z$  calcd for  $\text{C}_{14}\text{H}_{16}\text{NSe}$   $[\text{M}+\text{H}]^+$ , 278.0442; found, 278.0438.

Spectroscopic Data of **(8d)**

*N*-(4-(phenylselanyl)phenyl)-[1,1'-biphenyl]-4-amine

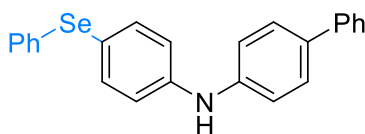

Synthesized according to General Procedure 3. The obtained product was a white solid (87% yield, 117mg,  $V_{\text{Petroleum ether}}/V_{\text{Ethyl acetate}} = 100:1$ ,  $R_f = 0.3$ ); **Mp**: 149-150 $^{\circ}\text{C}$ ; **IR**(KBr): 3321, 2979, 1929, 1591, 1320, 1050, 744, 642 $\text{cm}^{-1}$ ;  **$^1\text{H NMR}$**  (400 MHz, Chloroform- $d$ )  $\delta$  7.70 – 7.26 (m, 10H), 7.23 (d,  $J = 7.3$  Hz, 1H), 7.20 – 7.00 (m, 5H), 6.94 (d,  $J = 8.6$  Hz, 2H), 5.75 (s, 1H);  **$^{13}\text{C NMR}$**  (100 MHz, Chloroform- $d$ )  $\delta$  142.3, 140.5, 139.6, 135.3, 133.5, 129.9, 128.1, 127.7, 127.0, 125.7, 125.6, 125.4, 118.7, 117.7, 117.0; **HRMS** (TOF-ESI $^+$ ):  $m/z$  calcd for  $\text{C}_{24}\text{H}_{20}\text{NSe}$   $[\text{M}+\text{H}]^+$ , 402.0755; found, 402.0750.

Spectroscopic Data of **(8e)**

4-(phenylselanyl)aniline

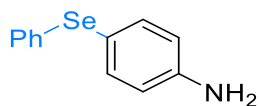

Synthesized according to General Procedure 3. The obtained product was a white solid (88% yield, 66 mg,  $V_{\text{Petroleum ether}}/V_{\text{Ethyl acetate}} = 50:1$ ,  $R_f = 0.4$ ); **Mp**: 89–91 °C; **IR** (KBr): 3447, 3358, 1607, 1486, 1054, 650  $\text{cm}^{-1}$ ;  **$^1\text{H NMR}$**  (400 MHz, Chloroform-*d*)  $\delta$  7.37–7.27 (m, 2H), 7.25–7.17 (m, 2H), 7.14–7.01 (m, 3H), 6.69–6.31 (m, 2H), 3.67 (s, 2H);  **$^{13}\text{C NMR}$**  (100 MHz, Chloroform-*d*)  $\delta$  145.8, 136.1, 133.1, 129.0, 128.0, 125.0, 115.3, 115.0; Data consistent with those previously reported.<sup>5</sup>

#### Spectroscopic Data of **(8f)**

##### *2-fluoro-4-(phenylselanyl)aniline*

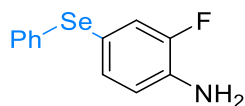

Synthesized according to General Procedure 3. The obtained product was a yellow oil (69% yield, 55 mg,  $V_{\text{Petroleum ether}}/V_{\text{Ethyl acetate}} = 50:1$ ,  $R_f = 0.4$ ); **IR** (KBr): 3468, 3372, 1610, 1476, 1064, 632  $\text{cm}^{-1}$ ;  **$^1\text{H NMR}$**  (400 MHz, Chloroform-*d*)  $\delta$  7.56–6.91 (m, 7H), 6.72 (t,  $J = 8.6$  Hz, 1H), 3.83 (s, 2H);  **$^{13}\text{C NMR}$**  (100 MHz, Chloroform-*d*)  $\delta$  150.3 (d,  $J_{\text{C-F}} = 242$  Hz), 133.9 (d,  $J = 13$  Hz), 132.0, 130.7 (d,  $J = 3$  Hz), 129.8, 128.2, 125.5, 121.1 (d,  $J = 19$  Hz), 116.3 (d,  $J = 4$  Hz), 115.6 (d,  $J = 6$  Hz);  **$^{19}\text{F NMR}$**  (376 MHz, Chloroform-*d*)  $\delta$  -133.8; **HRMS** (TOF-ESI<sup>+</sup>):  $m/z$  calcd for  $\text{C}_{12}\text{H}_{11}\text{FNSe}$   $[\text{M}+\text{H}]^+$ : 268.0035; found: 268.0035.

#### Spectroscopic Data of **(8g)**

##### *N,N-dimethyl-4-(phenylselanyl)aniline*

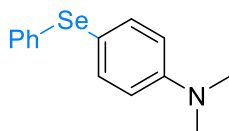

Synthesized according to General Procedure 3. The obtained product was a yellow oil (91% yield, 75 mg,  $V_{\text{Petroleum ether}}/V_{\text{Ethyl acetate}} = 50:1$ ,  $R_f = 0.4$ ); **IR** (KBr): 3067, 1589,

1503, 1360, 1193, 652 $\text{cm}^{-1}$ ;  $^1\text{H NMR}$  (400 MHz, Chloroform-d)  $\delta$  7.45 – 7.37 (m, 2H), 7.24 – 7.14 (m, 2H), 7.14 – 7.00 (m, 3H), 6.64 – 6.52 (m, 2H), 2.89 (s, 6H);  $^{13}\text{C NMR}$  (100 MHz, Chloroform-d)  $\delta$  150.6, 137.2, 134.7, 129.8, 129.0, 125.8, 113.7, 113.2, 40.4; Data consistent with those previously reported.<sup>2</sup>

#### Spectroscopic Data of (8h)

*6-(phenylselanyl)-1,2,3,4-tetrahydroquinoline*

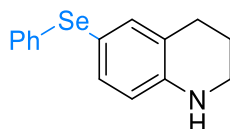

Synthesized according to General Procedure 3. The obtained product was a yellow solid (89% yield, 78mg,  $V_{\text{Petroleum ether}}/V_{\text{Ethyl acetate}} = 20:1$ ,  $R_f = 0.4$ ); **Mp**: 47-49°C; **IR**(KBr): 3414, 2927, 1595, 1501, 1475, 1437, 1299, 1021, 810, 735, 690;  $^1\text{H NMR}$  (400 MHz, Chloroform-d)  $\delta$  7.26 – 7.01 (m, 7H), 6.34 (d,  $J = 8.0$  Hz, 1H), 3.89 (s, 1H), 3.28 – 3.21 (m, 2H), 2.66 (t,  $J = 6.4$  Hz, 2H), 1.91 – 1.80 (m, 2H);  $^{13}\text{C NMR}$  (100 MHz, Chloroform-d)  $\delta$  144.2, 136.4, 133.9, 133.7, 128.7, 127.9, 124.7, 121.4, 113.8, 112.7, 40.8, 25.8, 20.7; Data consistent with those previously reported.<sup>4</sup>

#### Spectroscopic Data of (8i)

*7-(phenylselanyl)-3,4-dihydro-2H-benzo[b][1,4]thiazine*

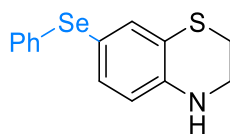

Synthesized according to General Procedure 3. The obtained product was a yellow solid (72% yield, 66mg,  $V_{\text{Petroleum ether}}/V_{\text{Ethyl acetate}} = 20:1$ ,  $R_f = 0.4$ ); **Mp**: 108-109°C; **IR**(KBr): 3474, 2994, 2944, 1766, 1245, 1056, 746, 693;  $^1\text{H NMR}$  (400 MHz, Chloroform-d)  $\delta$  7.27 – 7.17 (m, 3H), 7.17 – 7.01 (m, 4H), 6.33 (d,  $J = 8.2$  Hz, 1H), 4.06 – 4.01 (m, 1H), 3.62 – 3.53 (m, 2H), 3.02 – 2.93 (m, 2H);  $^{13}\text{C NMR}$  (100 MHz, Chloroform-d)  $\delta$  142.0, 135.0, 133.9, 133.2, 130.3, 129.1, 126.1, 116.9, 116.0, 115.7,

42.3, 25.6; **HRMS** (TOF-ESI+):  $m/z$  calcd for  $C_{14}H_{14}NSe$   $[M+H]^+$ , 308.0007; found, 308.0005.

#### Spectroscopic Data of **(8j)**

*7-(phenylselanyl)-3,4-dihydro-2H-benzo[b][1,4]oxazine*

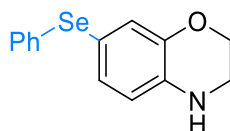

Synthesized according to General Procedure 3. The obtained product was a brown oil (85% yield, 75 mg,  $V_{\text{Petroleum ether}}/V_{\text{Ethyl acetate}} = 20:1$ ,  $R_f = 0.5$ ); **IR** (KBr): 3298, 2976, 2261, 1929, 1588, 1041, 745,  $652\text{cm}^{-1}$ ;  **$^1\text{H NMR}$**  (400 MHz, Chloroform- $d$ )  $\delta$  7.37 – 6.84 (m, 6H), 6.80 – 6.48 (m, 1H), 6.43 (d,  $J = 8.1$  Hz, 1H), 4.21 – 4.03 (m, 2H), 3.77 (s, 1H), 3.32 (dt,  $J = 6.3, 3.2$  Hz, 2H);  **$^{13}\text{C NMR}$**  (100 MHz, Chloroform- $d$ )  $\delta$  143.2, 133.1, 132.7, 129.5, 128.0, 127.7, 125.1, 122.7, 115.4, 114.9, 114.6, 64.0, 39.7; **HRMS** (TOF-ESI+):  $m/z$  calcd for  $C_{14}H_{14}NOSe$   $[M+H]^+$ , 292.0235; found, 292.0231.

#### Spectroscopic Data of **(8k)**

*phenyl(2,4,6-trimethoxyphenyl)selane*

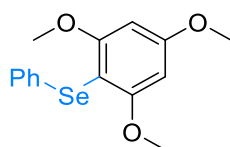

Synthesized according to General Procedure 3. The obtained product was a white solid (65% yield, 63 mg,  $V_{\text{Petroleum ether}}/V_{\text{Ethyl acetate}} = 20:1$ ,  $R_f = 0.4$ ); **Mp**: 99–100°C; **IR** (KBr): 1578, 1467, 1452, 1409, 1336, 1228, 1204, 1162, 1123, 814,  $735\text{cm}^{-1}$ ;  **$^1\text{H NMR}$**  (400 MHz, Chloroform- $d$ )  $\delta$  7.15 – 6.98 (m, 5H), 6.13 (s, 2H), 3.78 (s, 3H), 3.71 (s, 6H);  **$^{13}\text{C NMR}$**  (100 MHz, Chloroform- $d$ )  $\delta$  163.0, 161.9, 133.6, 128.7, 128.7, 125.3, 97.0, 91.2, 56.3, 55.4; Data consistent with those previously reported.<sup>4</sup>

#### Spectroscopic Data of **(8l)**

*4-(methylselanyl)-N-phenylaniline*

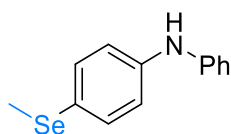

Synthesized according to General Procedure 3. The obtained product was a white solid (67% yield, 53mg,  $V_{\text{Petroleum ether}}/V_{\text{Ethyl acetate}} = 500:1$ ,  $R_f = 0.3$ ); **Mp**: 78-80°C; **IR**(KBr): 3417, 2956, 2548, 1585, 1407, 1178, 762, 647  $\text{cm}^{-1}$ ; **<sup>1</sup>H NMR** (400 MHz, Chloroform-*d*)  $\delta$  7.34 – 7.27 (m, 2H), 7.25 – 7.13 (m, 2H), 6.98 (d,  $J = 8.6$  Hz, 2H), 6.95 – 6.83 (m, 3H), 5.62 (s, 1H), 2.24 (s, 3H); **<sup>13</sup>C NMR** (100 MHz, Chloroform-*d*)  $\delta$  141.69, 141.13, 132.15, 128.35, 120.64, 120.25, 117.32, 116.97, 7.58; **HRMS** (TOF-ESI<sup>+</sup>):  $m/z$  calcd for  $\text{C}_{14}\text{H}_{14}\text{NSe}$   $[\text{M}+\text{H}]^+$ , 307.9998. ; **HRMS** (TOF-ESI<sup>+</sup>):  $m/z$  calcd for  $\text{C}_{13}\text{H}_{14}\text{NSe}$   $[\text{M}+\text{H}]^+$ , 264.0286; found, 264.0287.

Spectroscopic Data of **(9a)**

*3-(phenylselanyl)-1H-indole*

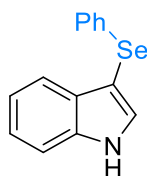

Synthesized according to General Procedure 3. The obtained product was a white solid (81% yield, 75mg,  $V_{\text{Petroleum ether}}/V_{\text{Ethyl acetate}} = 20:1$ ,  $R_f = 0.5$ ); **Mp**: 145-146°C; **IR**(KBr): 3410, 3123, 3049, 2921, 1646, 1573, 1451, 1236, 1020, 825, 730, 684  $\text{cm}^{-1}$ ; **<sup>1</sup>H NMR** (400 MHz, Chloroform-*d*)  $\delta$  8.33 (s, 1H), 7.56 (dd,  $J = 7.8, 1.1$  Hz, 1H), 7.50 – 7.30 (m, 2H), 7.29 – 6.94 (m, 7H); **<sup>13</sup>C NMR** (100 MHz, Chloroform-*d*)  $\delta$  136.4, 133.8, 131.3, 130.0, 129.0, 128.7, 125.6, 123.0, 120.9, 120.4, 111.39, 98.2; Data consistent with those previously reported.<sup>4</sup>

Spectroscopic Data of **(9b)**

*1-methyl-3-(phenylselanyl)-1H-indole*



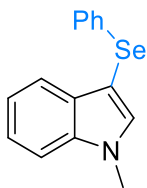

Synthesized according to General Procedure 3. The obtained product was a white oil (97% yield, 84mg,  $V_{\text{Petroleum ether}}/V_{\text{Ethyl acetate}} = 20:1$ ,  $R_f = 0.5$ ); **Mp**: 67°C; **IR** (KBr): 3439, 3109, 1573, 1503, 1474, 1236, 1021, 738  $\text{cm}^{-1}$ ;  **$^1\text{H NMR}$**  (400 MHz, Chloroform-d)  $\delta$  7.56 (dd,  $J = 7.9, 1.0$  Hz, 1H), 7.34 – 6.97 (m, 9H), 3.78 (s, 3H);  **$^{13}\text{C NMR}$**  (100 MHz, Chloroform-d)  $\delta$  136.5, 134.7, 133.3, 129.8, 128.0, 127.6, 124.6, 121.5, 119.5, 119.5, 108.6, 94.9, 32.17; Data consistent with those previously reported.<sup>4</sup>

#### Spectroscopic Data of (9c)

##### *5-methyl-3-(phenylselanyl)-1H-indole*

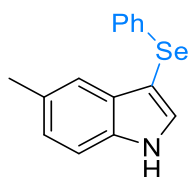

Synthesized according to General Procedure 3. The obtained product was a white solid (84% yield, 72mg,  $V_{\text{Petroleum ether}}/V_{\text{Ethyl acetate}} = 20:1$ ,  $R_f = 0.5$ ); **Mp**: 107-108°C; **IR** (KBr): 3407, 1575, 1474, 1437, 1391, 1112, 1069, 1019, 797, 741, 646  $\text{cm}^{-1}$ ;  **$^1\text{H NMR}$**  (400 MHz, Chloroform-d)  $\delta$  8.37 – 7.95 (s, 1H), 7.24 (d,  $J = 2.6$  Hz, 1H), 7.11 (d,  $J = 8.2$  Hz, 1H), 7.08 – 7.03 (m, 2H), 7.03 – 6.89 (m, 4H), 6.74 (d,  $J = 7.0$  Hz, 1H), 2.55 (s, 3H);  **$^{13}\text{C NMR}$**  (100 MHz, Chloroform-d)  $\delta$  136.9, 136.2, 132.6, 132.3, 129.1, 128.1, 128.9, 127.3, 125.4, 123.0, 122.5, 109.4, 96.8, 18.9; Data consistent with those previously reported.<sup>4</sup>

#### Spectroscopic Data of (9d)

##### *5-fluoro-3-(phenylselanyl)-1H-indole*

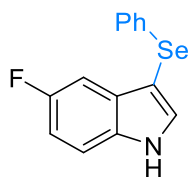

Synthesized according to General Procedure 3. The obtained product was a white solid (99% yield, 87 mg,  $V_{\text{Petroleum ether}}/V_{\text{Ethyl acetate}} = 20:1$ ,  $R_f = 0.5$ ); **Mp**: 161-162°C; **IR**(KBr): 3416, 3044, 2259, 1927, 1668, 1267, 1024, 785, 646  $\text{cm}^{-1}$ ;  **$^1\text{H NMR}$**  (400 MHz, Acetone- $d_6$ )  $\delta$  10.95 (s, 1H), 7.77 (d,  $J = 2.4$  Hz, 1H), 7.55 (dd,  $J = 8.8, 4.4$  Hz, 1H), 7.35 – 7.08 (m, 6H), 7.01 (m,  $J = 9.1, 2.6$  Hz, 1H);  **$^{13}\text{C NMR}$**  (100 MHz, Acetone- $d_6$ )  $\delta$  158.4 (d,  $J_{\text{C-F}} = 231$  Hz), 134.5 (d,  $J = 80$  Hz), 134.3, 130.8 (dd,  $J = 10$  Hz), 129.0, 128.4, 125.7, 113.2 (d,  $J = 9$  Hz), 113.1 (d,  $J = 9$  Hz), 110.7, 110.4, 104.2, 104.0, 96.4;  **$^{19}\text{F NMR}$**  (376 MHz, Acetone)  $\delta$  -124.94; Data consistent with those previously reported.<sup>4</sup>

#### Spectroscopic Data of **(9e)**

##### *5-iodo-3-(phenylselanyl)-1H-indole*

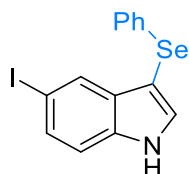

Synthesized according to General Procedure 3. The obtained product was a white solid (95% yield, 114 mg,  $V_{\text{Petroleum ether}}/V_{\text{Ethyl acetate}} = 20:1$ ,  $R_f = 0.5$ ); **Mp**: 125-128°C; **IR**(KBr): 3451, 2984, 2139, 1927, 1274, 1088, 883, 740, 654  $\text{cm}^{-1}$ ;  **$^1\text{H NMR}$**  (400 MHz, Chloroform- $d$ )  $\delta$  8.37 (s, 1H), 7.90 (d,  $J = 1.7$  Hz, 1H), 7.71 – 7.30 (m, 2H), 7.30 – 6.84 (m, 6H);  **$^{13}\text{C NMR}$**  (100 MHz, Chloroform- $d$ )  $\delta$  134.5, 132.3, 131.5, 131.0, 130.4, 128.2, 128.0, 127.6, 124.8, 112.3, 96.5, 83.6; Data consistent with those previously reported.<sup>6</sup>

#### Spectroscopic Data of **(9f)**

##### *5-methoxy-3-(phenylselanyl)-1H-indole*

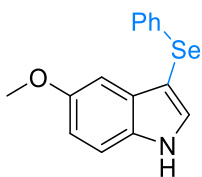

Synthesized according to General Procedure 3. The obtained product was a white oil (87% yield, 78 mg,  $V_{\text{Petroleum ether}}/V_{\text{Ethyl acetate}} = 20:1$ ,  $R_f = 0.5$ ); **IR** (KBr): 3401, 3198, 2419, 1926, 1441, 1166, 1028, 825, 788, 727, 634, 552  $\text{cm}^{-1}$ ;  **$^1\text{H NMR}$**  (400 MHz, Chloroform-*d*)  $\delta$  8.48 – 8.01 (m, 1H), 7.34 (d,  $J = 2.6$  Hz, 1H), 7.23 (d,  $J = 8.8$  Hz, 1H), 7.20 – 7.10 (m, 2H), 7.11 – 6.95 (m, 4H), 6.83 (dd,  $J = 8.8, 2.5$  Hz, 1H), 3.71 (s, 3H);  **$^{13}\text{C NMR}$**  (100 MHz, Chloroform-*d*)  $\delta$  155.1, 134.0, 132.0, 131.3, 130.8, 129.0, 128.5, 125.6, 113.5, 112.3, 101.5, 97.6, 55.8; Data consistent with those previously reported.<sup>6</sup>

#### Spectroscopic Data of (10a)

*N,N'*-dimethyl-[1,1'-biphenyl]-4,4'-diamine

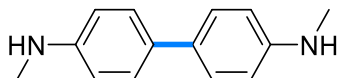

Synthesized according to General Procedure 4. The obtained product was a yellow oil (35% yield, 22 mg,  $V_{\text{Petroleum ether}}/V_{\text{Ethyl acetate}} = 5:1$ ,  $R_f = 0.4$ ); **IR** (KBr): 3355, 2227, 1736, 1628, 1597, 1217, 1024, 643  $\text{cm}^{-1}$ ;  **$^1\text{H NMR}$**  (400 MHz, Chloroform-*d*)  $\delta$  6.93 (d,  $J = 8.2$  Hz, 4H), 6.48 (m, 4H), 3.71 (s, 2H), 2.74 (s, 6H);  **$^{13}\text{C NMR}$**  (100 MHz, Chloroform-*d*)  $\delta$  146.4, 129.9, 128.5, 111.5, 30.0; **HRMS** (TOF-ESI+):  $m/z$  calcd for  $\text{C}_{14}\text{H}_{17}\text{N}_2$  [ $\text{M}+\text{H}$ ]<sup>+</sup>, 213.1386; found: 213.1382.

#### Spectroscopic Data of (10b)

*N,N',3,3'*-tetramethyl-[1,1'-biphenyl]-4,4'-diamine

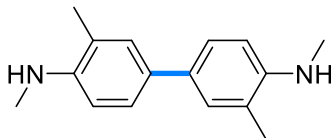

Synthesized according to General Procedure 4. The obtained product was a yellow oil (37% yield, 26 mg,  $V_{\text{Petroleum ether}}/V_{\text{Ethyl acetate}} = 10:1$ ,  $R_f = 0.4$ ); **IR** (KBr): 3432, 2145, 1836, 1528, 1226, 1075, 756, 643  $\text{cm}^{-1}$ ;  **$^1\text{H NMR}$**  (400 MHz, Chloroform-*d*)  $\delta$  7.03 –

6.97 (m, 2H), 6.93 – 6.87 (m, 2H), 6.56 (d,  $J = 8.1$  Hz, 2H), 3.78 (s, 2H), 2.89 (s, 6H), 2.11 (s, 6H);  $^{13}\text{C NMR}$  (100 MHz, Chloroform- $d$ )  $\delta$  144.3, 129.5, 126.2, 121.1, 108.2, 30.0, 16.4; **HRMS** (TOF-ESI+):  $m/z$  calcd for  $\text{C}_{16}\text{H}_{21}\text{N}_2$   $[\text{M}+\text{H}]^+$ , 241.1699; found:240.1696.

#### Spectroscopic Data of (10c)

*N4,N4',2,2'-tetramethyl-[1,1'-biphenyl]-4,4'-diamine*

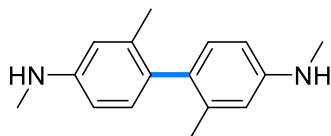

Synthesized according to General Procedure 4. The obtained product was a yellow oil (36% yield, 25mg,  $V_{\text{Petroleum ether}}/V_{\text{Ethyl acetate}} = 10:1$ ,  $R_f = 0.4$ ); **IR**(KBr): 3435, 2135, 1826, 1528, 1229, 1064, 762, 643  $\text{cm}^{-1}$ ;  $^1\text{H NMR}$  (400 MHz, Chloroform- $d$ )  $\delta$  6.65 (d,  $J = 8.2$  Hz, 2H), 6.41 (d,  $J = 2.6$  Hz, 2H), 6.31 (d,  $J = 8.2$  Hz, 2H), 3.64 (s, 2H), 2.74 (s, 6H), 2.13 (s, 6H);  $^{13}\text{C NMR}$  (100 MHz, Chloroform- $d$ )  $\delta$  146.6, 136.3, 128.9, 127.1, 113.4, 109.0, 30.0, 18.8; **HRMS** (TOF-ESI+):  $m/z$  calcd for  $\text{C}_{16}\text{H}_{21}\text{N}_2$   $[\text{M}+\text{H}]^+$ , 241.1699.; found:241.1670.

#### Spectroscopic Data of (10d)

*N4,N4,N4',N4'-tetramethyl-[1,1'-biphenyl]-4,4'-diamine*

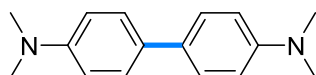

Synthesized according to General Procedure 4. The obtained product was a white solid (46% yield, 33mg,  $V_{\text{Petroleum ether}}/V_{\text{Ethyl acetate}} = 60:1$ ,  $R_f = 0.4$ ); **MP**: 140-142°C; **IR**(KBr): 3074, 2832, 1805, 1547, 1461, 1291, 1139, 1083, 713, 633, 561  $\text{cm}^{-1}$ ;  $^1\text{H NMR}$  (400 MHz, Chloroform- $d$ )  $\delta$  7.11 – 6.85 (m, 4H), 6.73 – 6.39 (m, 4H), 2.81 (s, 12H);  $^{13}\text{C NMR}$  (100 MHz, Chloroform- $d$ )  $\delta$  148.0, 129.3, 128.4, 112.0, 40.0; **HRMS** (TOF-ESI+):  $m/z$  calcd for  $\text{C}_{16}\text{H}_{21}\text{N}_2$   $[\text{M}+\text{H}]^+$ , 241.1699.; found:241.1697.

#### Spectroscopic Data of (10e)

*6,6'-dibromo-1H,1'H-3,3'-biindole*

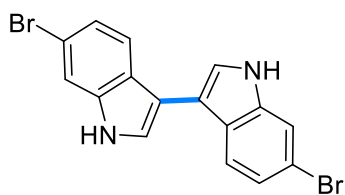

Synthesized according to General Procedure 4. The obtained product was a white solid (45% yield, 52mg,  $V_{\text{Petroleum ether}}/V_{\text{Ethyl acetate}} = 5:1$ ,  $R_f = 0.4$ ); **MP**:239-240°C; **IR**(KBr): 3382, 1589, 1519, 1335, 789  $\text{cm}^{-1}$ ;  **$^1\text{H NMR}$**  (400 MHz,  $\text{DMSO-}d_6$ )  $\delta$  11.41 (s, 2H), 7.83 – 7.62 (m, 6H), 7.22 (dd,  $J = 8.5$  Hz, 2H);  **$^{13}\text{C NMR}$**  (100 MHz,  $\text{DMSO-}d_6$ )  $\delta$  137.7, 125.4, 123.5, 122.3, 121.7, 114.6, 114.5, 109.8; **HRMS** (TOF-ESI+):  $m/z$  calcd for  $\text{C}_{16}\text{H}_{21}\text{N}_2$   $[\text{M}+\text{H}]^+$ , 388.9283.; found:387.9282.

#### Spectroscopic Data of (10f)

*1,1'-dimethyl-1H,1'H-3,3'-biindole*

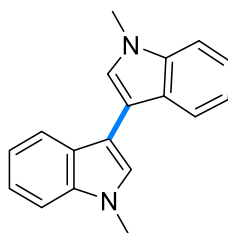

Synthesized according to General Procedure 4. The obtained product was a white solid (46% yield, 36mg,  $V_{\text{Petroleum ether}}/V_{\text{Ethyl acetate}} = 30:1$ ,  $R_f = 0.4$ ); **MP**:69-70°C; **IR**(KBr): 2995, 2359, 1769, 1241, 739  $\text{cm}^{-1}$ ;  **$^1\text{H NMR}$**  (400 MHz,  $\text{Chloroform-}d$ )  $\delta$  7.76 (dd,  $J = 8.2$  Hz, 2H), 7.30 (dd,  $J = 8.2$  Hz, 2H), 7.27 – 7.14 (m, 4H), 7.12-7.05 (m, 2H), 3.96 – 3.56 (m, 6H);  **$^{13}\text{C NMR}$**  (100 MHz,  $\text{Chloroform-}d$ )  $\delta$  137.1, 127.2, 126.1, 121.8, 120.3, 119.2, 109.5, 109.3, 32.9; **HRMS** (TOF-ESI+):  $m/z$  calcd for  $\text{C}_{18}\text{H}_{16}\text{N}_2\text{Na}$   $[\text{M}+\text{Na}]^+$ , 283.1210; found:283.1206.

#### 4. Mechanistic studies

a)

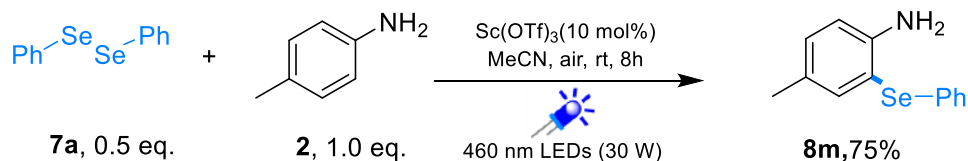

4-methyl-2-(phenylselanyl)aniline (**8m**).

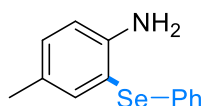

Synthesized according to General Procedure 3. The obtained product was a yellow oil (75% yield, 58 mg,  $V_{\text{Petroleum ether}}/V_{\text{Ethyl acetate}} = 30:1$ ,  $R_f = 0.4$ ); **IR** (KBr): 3458, 3365, 1611, 1490, 1066, 1079, 643  $\text{cm}^{-1}$ ; **<sup>1</sup>H NMR** (400 MHz, Chloroform-*d*)  $\delta$  7.33 (dd,  $J = 2.0$ , 1H), 7.17 – 7.04 (m, 5H), 6.96 (dd,  $J = 8.1$ , 0.7 Hz, 1H), 6.65 (d,  $J = 8.1$  Hz, 1H), 3.98 (s, 2H), 2.16 (s, 3H); **<sup>13</sup>C NMR** (100 MHz, Chloroform-*d*)  $\delta$  146.2, 138.7, 131.9, 131.8, 129.3, 129.2, 128.2, 126.1, 115.1, 112.7, 20.2; **HRMS** (TOF-ESI<sup>+</sup>):  $m/z$  calcd for C<sub>13</sub>H<sub>14</sub>NSe [M+H]<sup>+</sup>, 264.0286; found: 264.0288.

b) radical clock experiments

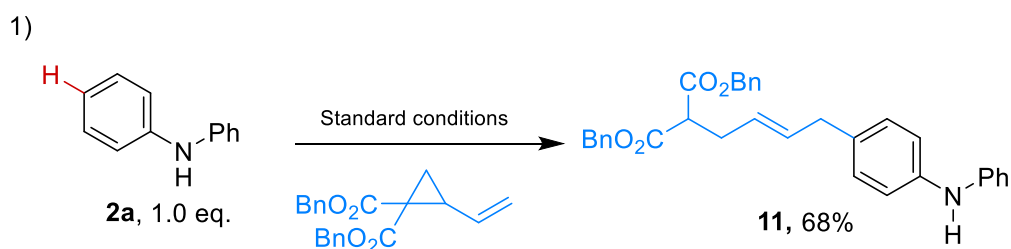

Under air atmosphere, arylamine **2a** (0.1 mmol, 1.0 equiv), dibenzyl 2-vinylcyclopropane-1,1-dicarboxylate, Sc(OTf)<sub>3</sub> (10 mol%, 0.01mmol) in MeCN (1.0 mL, 0.1 M) were added to 20.0 mL reaction tube(parallel three samples). The mixture was stirred at 460 nm light-emitting diodes (LEDs, 30 W) and monitored by TLC. After stirring for 8 h. Then, the reaction was quenched with saturated NaCl solution and extracted with 20.0 mL EtOAc for three times. The organic layers were combined, dried over Na<sub>2</sub>SO<sub>4</sub>, filtered and evaporated under reduced pressure. The residues were purified by flash column chromatography on silica gel to provide the products **11**. The products were further identified by FTIR spectroscopy, NMR spectroscopy, and HRMS .  
dibenzyl (E)-2-(4-(4-(phenylamino)phenyl)but-2-en-1-yl)malonate(**11**)

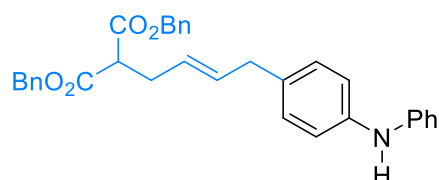

The obtained product was a yellow oil(68%yield, 103mg,  $V_{\text{Petroleum ether}}/V_{\text{Ethyl acetate}} = 20:1$ ,  $R_f = 0.4$ ); **IR**(KBr): 3462, 3065, 1789, 1626, 1548, 1278, 1089, 864, 633cm<sup>-1</sup>; **<sup>1</sup>H NMR** (400 MHz, Chloroform-d)  $\delta$ 7.24 – 7.06 (m, 15H), 6.90 – 6.77 (m, 4H), 5.57 – 5.45 (m, 2H), 5.41 – 5.21 (m, 1H), 5.08 – 4.98 (m, 4H), 3.44 (t,  $J = 7.5$  Hz, 1H), 3.16 (dd,  $J = 6.1$ Hz, 2H), 2.63 – 2.50 (m, 2H); **<sup>13</sup>C NMR** (101 MHz, Chloroform-d)  $\delta$  167.56, 140.34, 134.22, 130.70, 129.48, 128.23, 127.51, 127.33, 127.24, 127.17, 126.28, 125.76, 121.31, 119.04, 119.01, 115.95, 66.14, 50.91, 34.33, 30.62; **HRMS** (TOF-ESI<sup>+</sup>):  $m/z$  calcd for C<sub>33</sub>H<sub>32</sub>NO<sub>4</sub> [M+H]<sup>+</sup>, 506.2326; found:506.2305.

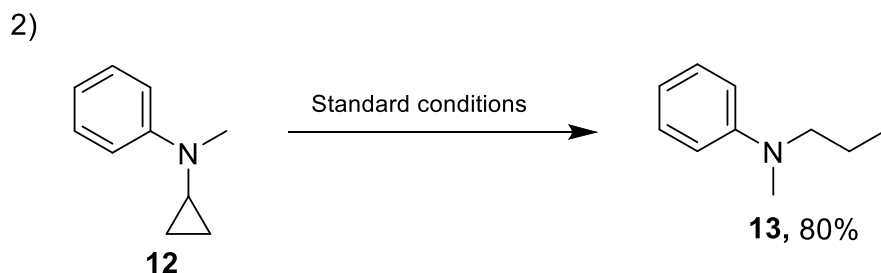

N-methyl-N-propylaniline (**13**)

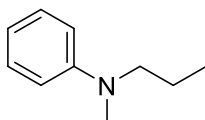

The obtained product was a yellow oil (80% yield, 36mg,  $V_{\text{Petroleum ether}}/V_{\text{Ethyl acetate}} = 150:1$ ,  $R_f = 0.4$ ); **IR** (KBr): 2958, 2129, 1596, 1505, 1372, 1120, 1082, 844, 746, 693  $\text{cm}^{-1}$ ;  **$^1\text{H NMR}$**  (400 MHz, Chloroform- $d$ )  $\delta$  7.38 – 6.83 (m, 2H), 6.83 – 6.33 (m, 3H), 3.43 – 3.04 (m, 2H), 2.85 (s, 3H), 1.65 – 1.26 (m, 2H), 0.84 (t,  $J = 7.4$  Hz, 3H);  **$^{13}\text{C NMR}$**  (100 MHz, Chloroform- $d$ )  $\delta$  148.3, 128.1, 114.7, 110.9, 53.5, 37.3, 18.8, 10.5; **HRMS** (TOF-ESI $^+$ ):  $m/z$  calcd for  $\text{C}_{10}\text{H}_{16}\text{N}$   $[\text{M}+\text{H}]^+$ , 150.1277; found: 150.1278.

For preparing product **12**

N-methylaniline **2b** (0.1 mmol, 1.0 equiv), cyclopropyl bromide (0.15 mmol, 1.5 equiv), sodium carbonate (0.2 mmol, 2.0 equiv), MeCN (1.0 mL, 0.1 M) were added to the round-bottled flask for 10 hours after reflux. Then, the reaction was quenched with saturated NaCl solution and extracted with 20.0 mL EtOAc for three times. The organic layers were combined, dried over  $\text{Na}_2\text{SO}_4$ , filtered and evaporated under reduced pressure. The residues were purified by flash column chromatography on silica gel to provide the products **13**. The products were further identified by FTIR spectroscopy, NMR spectroscopy, and HRMS



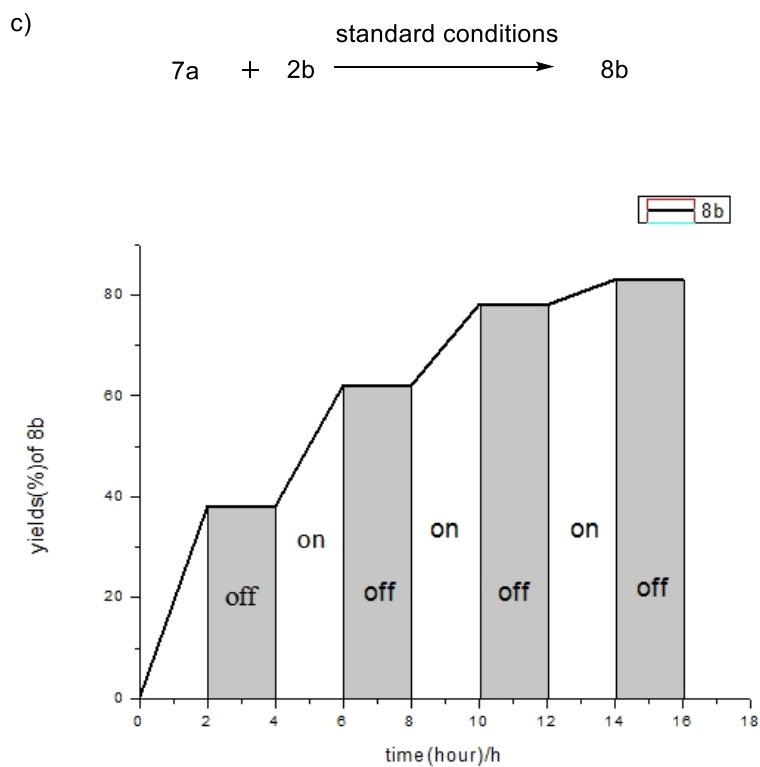

**Figure S2.** Switching light experient

d) UV-experiments

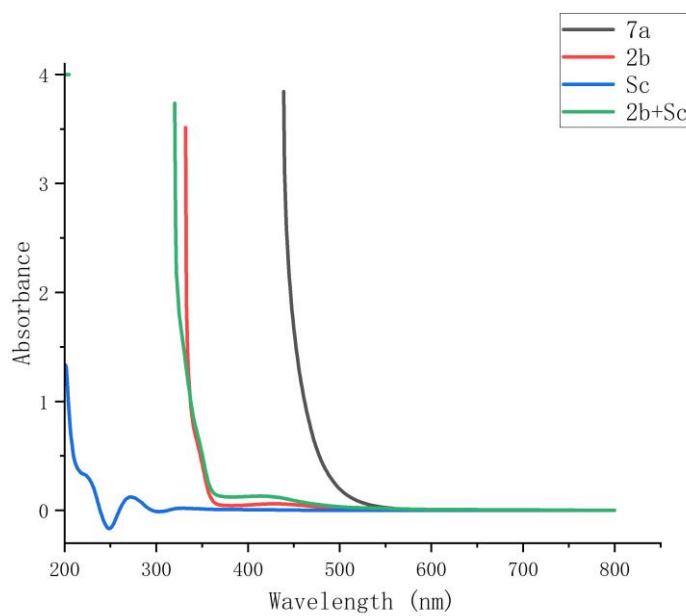

**Figure S3.** UV Spectra of 7a(0.4mmol), 2b(0.4mmol) and Sc(OTf)<sub>3</sub> (10mmol%) in MeCN(4mL)

e) NMR-experiments

12022116071.267.fid  
202411030-3

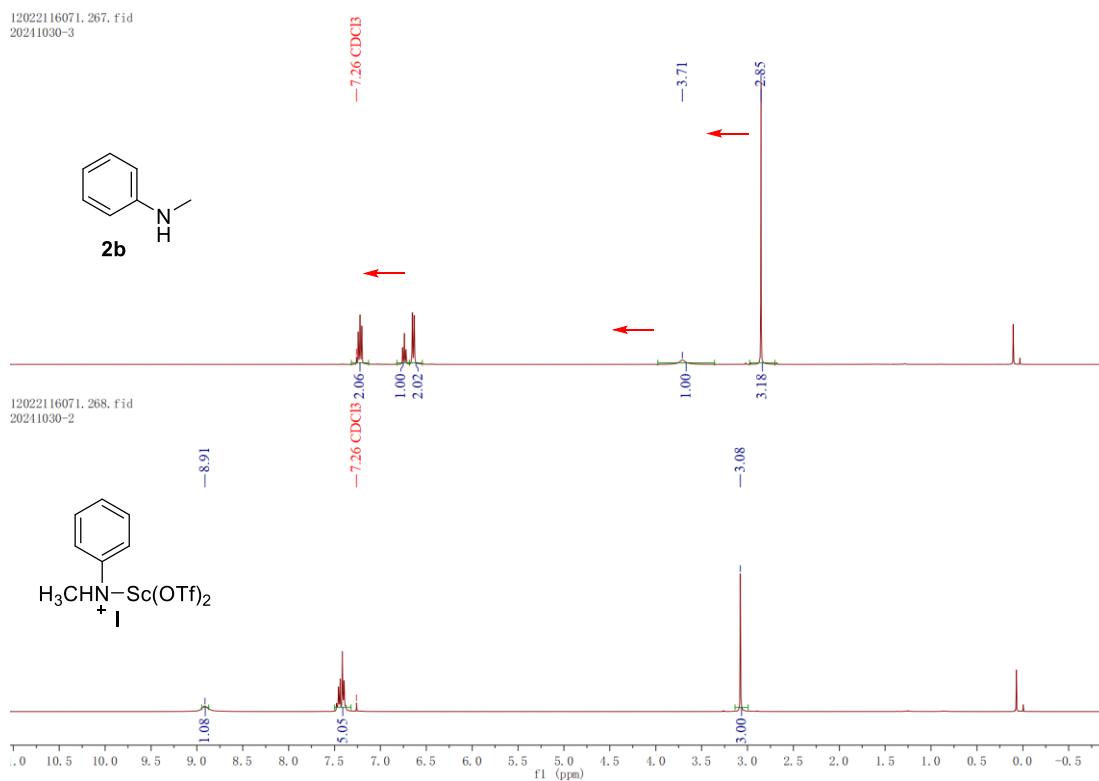

**Figure S4.** UV Spectra of **2b** and intermediate **I**

Under air atmosphere, arylamine **2b** (0.1 mmol, 1.0 equiv), Sc(OTf)<sub>3</sub> (10 mol%, 0.01mmol) in CDCl<sub>3</sub> (1.0 mL, 0.1 M) were added to 20.0 mL reaction tub. After stirring for half an hour. Then, the products were further identified by NMR spectroscopy.

## 5. Synthetic applications

1)

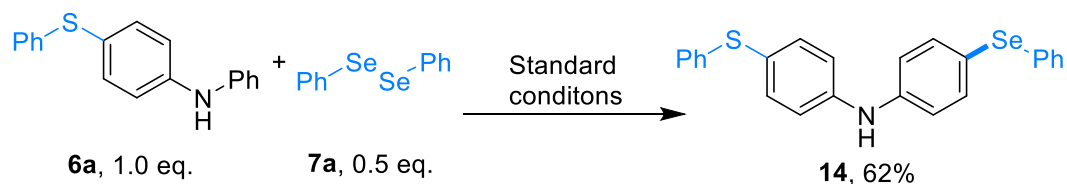

Under air atmosphere, N-phenyl-4-(phenylthio)aniline **6a** (0.1 mmol, 1.0 equiv) and selenide (0.05 mmol, 0.5 equiv),  $\text{Sc}(\text{OTf})_3$  (10 mol%, 0.01 mmol) and in MeCN (1.0 mL, 0.1 M) were added to 20.0 mL reaction tube (parallel three samples). The mixture was stirred at 460 nm light-emitting diodes (LEDs, 30 W) and monitored by TLC. After stirring for 8 h. Then, the reaction was quenched with saturated NaCl solution and extracted with 20.0 mL EtOAc for three times. The organic layers were combined, dried over  $\text{Na}_2\text{SO}_4$ , filtered and evaporated under reduced pressure. The products were further identified by HRMS. This product **14** was further identified by NMR spectroscopy.

*4-(phenylselanyl)-N-(4-(phenylthio)phenyl)aniline (14).*

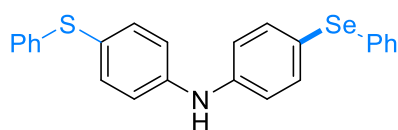

The obtained product was a brown solid (62% yield, 80 mg,  $V_{\text{Petroleum ether}}/V_{\text{Ethyl acetate}} = 500:1$ ,  $R_f = 0.2$ ); **Mp**: 112–114°C; **IR** (KBr): 3476, 2976, 2923, 2328, 1868, 1682, 1588, 1501, 1416, 1052, 757, 683  $\text{cm}^{-1}$ ;  **$^1\text{H NMR}$**  (400 MHz, Chloroform-*d*)  $\delta$  7.57–7.05 (m, 11H), 7.07–6.96 (m, 4H), 6.92 (m, 3H), 5.72 (s, 1H);  **$^{13}\text{C NMR}$**  (100 MHz, Chloroform-*d*)  $\delta$  143.1, 140.8, 137.5, 134.6, 131.4, 130.9, 129.6, 128.4, 128.2, 127.3, 125.9, 121.4, 121.1, 118.9, 116.4; **HRMS** (TOF-ESI<sup>+</sup>):  $m/z$  calcd for  $\text{C}_{24}\text{H}_{20}\text{NSe}$   $[\text{M}+\text{H}]^+$ , 434.0476; found, 434.0475.

2)

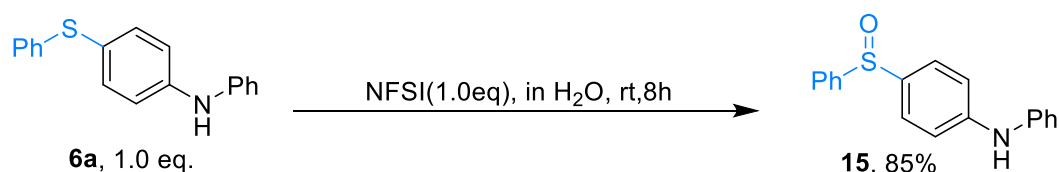

Under air atmosphere, N-phenyl-4-(phenylthio)aniline **6a** (0.1 mmol, 1.0 equiv), NFSI (0.1mmol, 1.0eq) and in H<sub>2</sub>O (1.0 mL, 0.1 M) were added to 20.0 mL reaction tube(parallel three samples). The mixture was stirred at room temperature reflux and monitored by TLC. After stirring for 8h. Then, the reaction was quenched with saturated NaCl solution and extracted with 20.0 mL EtOAc for three times. The organic layers were combined, dried over Na<sub>2</sub>SO<sub>4</sub>, filtered and evaporated under reduced pressure. The products were further identified by HRMS. This product **15** was further identified by NMR spectroscop.

*N*-phenyl-4-(phenylsulfinyl)aniline(**15**).

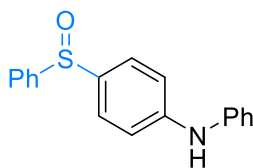

The obtained product was a paleyellow oil (85%yield, 72mg,  $V_{\text{Petroleum ether}}/V_{\text{Ethyl acetate}} = 100:1$ ,  $R_f = 0.4$ ); **IR**(KBr): 3382, 2979, 2546, 2257, 2140, 1928, 1585, 1452, 1050, 790, 650cm<sup>-1</sup>; **<sup>1</sup>H NMR** (400 MHz, Chloroform-*d*)  $\delta$  7.34 – 7.27 (m, 2H), 7.27 – 7.11 (m, 6H), 7.11 – 6.99 (m, 3H), 6.99 – 6.86 (m, 3H), 5.74 (s, 1H); **<sup>13</sup>C NMR** (100 MHz, Chloroform-*d*)  $\delta$  142.7, 141.0, 137.7, 134.2, 128.4, 127.9, 127.1, 124.7, 122.4, 120.9, 117.9, 116.5; **HRMS** (TOF-ESI<sup>+</sup>):  $m/z$  calcd for C<sub>18</sub>H<sub>16</sub>NOS [M+H]<sup>+</sup>, 294.0947; found, 294.0944.

3)

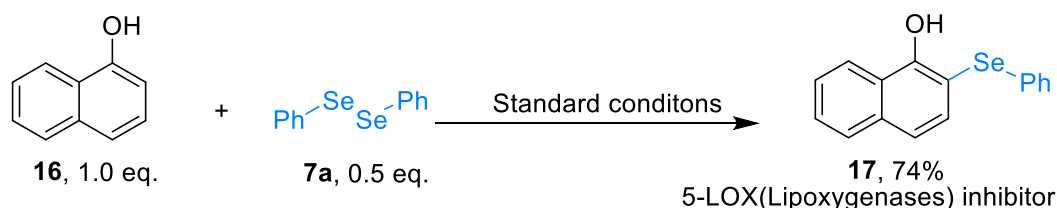

Under air atmosphere, naphthalen-1-ol **16** (0.1 mmol, 1.0 equiv) and selenide (0.05 mmol, 0.5 equiv),  $\text{Sc}(\text{OTf})_3$  (10 mol%, 0.01 mmol) and in MeCN (1.0 mL, 0.1 M) were added to 20.0 mL reaction tube (parallel three samples). The mixture was stirred at 460 nm light-emitting diodes (LEDs, 30 W) and monitored by TLC. After stirring for 8 h. Then, the reaction was quenched with saturated NaCl solution and extracted with 20.0 mL EtOAc for three times. The organic layers were combined, dried over  $\text{Na}_2\text{SO}_4$ , filtered and evaporated under reduced pressure. The products were further identified by HRMS. This product **17** was further identified by NMR spectroscopy.

*2-(phenylselanyl)naphthalen-1-ol (17).*

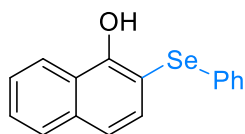

The obtained product was a pale yellow solid (74% yield, 66 mg,  $V_{\text{Petroleum ether}}/V_{\text{Ethyl acetate}} = 500:1$ ,  $R_f = 0.4$ ); **Mp**: 67–68°C; **IR** (KBr): 3394, 3053, 1584, 1501, 1476, 1393, 1262, 1193, 1021, 878, 733, 658  $\text{cm}^{-1}$ ;  **$^1\text{H NMR}$**  (400 MHz, Chloroform-*d*)  $\delta$  8.27 – 8.14 (m, 1H), 7.73 (d,  $J = 7.3, 1.9$  Hz, 1H), 7.56 (d,  $J = 8.6$  Hz, 1H), 7.46 (m, 2H), 7.29 (s, 1H), 7.24 – 7.04 (m, 5H), 7.00 (s, 1H);  **$^{13}\text{C NMR}$**  (100 MHz, Chloroform-*d*)  $\delta$  153.8, 135.8, 133.4, 131.1, 129.5, 127.7, 127.6, 126.8, 125.8, 123.5, 123.4, 120.8, 107.6; **HRMS** (TOF-ESI<sup>+</sup>):  $m/z$  calcd for  $\text{C}_{16}\text{H}_{13}\text{OSe}$   $[\text{M}+\text{H}]^+$ , 301.0126, found 301.0125. Data consistent with those previously reported.<sup>7</sup>

4)

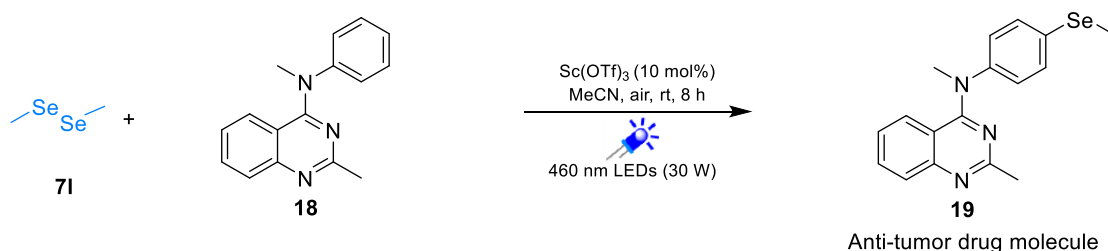

Under air atmosphere, compound **18** (0.1 mmol, 1.0 equiv) and selenide (0.05 mmol, 0.5 equiv), Sc(OTf)<sub>3</sub> (10 mol%, 0.01 mmol) and in MeCN (1.0 mL, 0.1 M) were added to 20.0 mL reaction tube (parallel three samples). The mixture was stirred at 460 nm light-emitting diodes (LEDs, 30 W) and monitored by TLC. After stirring for 8 h. Then, the reaction was quenched with saturated NaCl solution and extracted with 20.0 mL EtOAc for three times. The organic layers were combined, dried over Na<sub>2</sub>SO<sub>4</sub>, filtered and evaporated under reduced pressure. The products were further identified by HRMS. This product **19** was further identified by NMR spectroscopy.

*N*,2-dimethyl-*N*-(4-(methylselanyl)phenyl)quinazolin-4-amine (**19**).

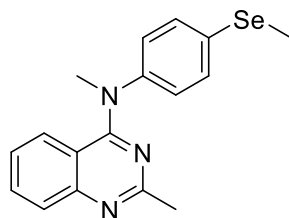

The obtained product was a pale yellow solid (82% yield, 56 mg,  $V_{\text{Petroleum ether}}/V_{\text{Ethyl acetate}} = 5:1$ ,  $R_f = 0.4$ ); **Mp**: 126–128 °C; **IR** (KBr): 3654, 3067, 1682, 1523, 1382, 1241, 1177, 1026, 834, 726 cm<sup>-1</sup>; **<sup>1</sup>H NMR** (400 MHz, Chloroform-*d*)  $\delta$  7.70 – 7.61 (m, 1H), 7.45 (dd,  $J = 8.4$  Hz, 1H), 7.32 – 7.23 (m, 2H), 7.03 – 6.82 (m, 4H), 3.51 (s, 3H), 2.65 (s, 3H), 2.27 (s, 3H); **<sup>13</sup>C NMR** (100 MHz, Chloroform-*d*)  $\delta$  163.4, 161.8, 152.1, 146.8, 131.9, 131.5, 129.3, 127.8, 126.2, 124.3, 114.8, 42.2, 26.5, 7.4; **HRMS** (TOF-ESI<sup>+</sup>):  $m/z$  calcd for C<sub>17</sub>H<sub>18</sub>N<sub>3</sub>Se [M+H]<sup>+</sup>, 344.0660, found 344.0662. Data consistent with those previously reported.<sup>8</sup>



## 6. X-ray Structure and Data

### X-ray Structure and Data of **5h**

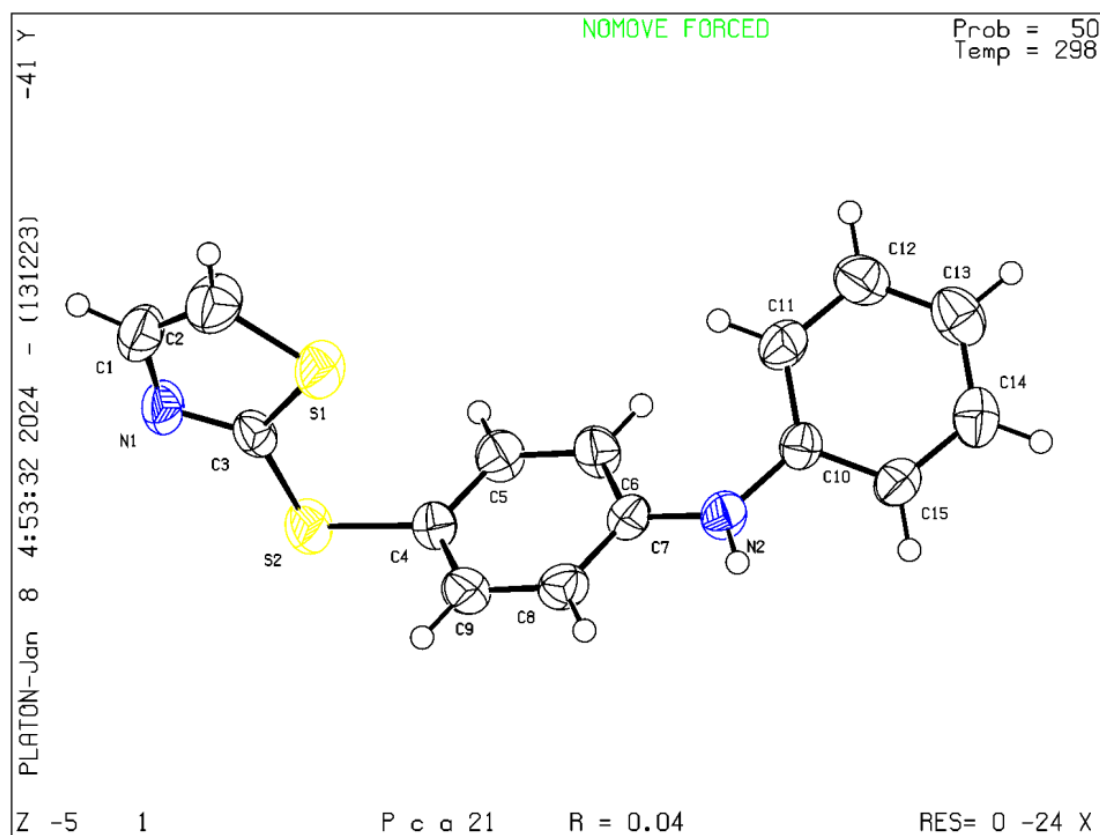

The ellipsoid contour percent probability level is 50% in the caption of the thermal ellipsoid plot.

**Figure S5.** X-Ray crystal structure of **5h**



**Table S1.** Crystal data and structure refinement for **5h****Datablock: 1**

|                                                               |                |                    |               |
|---------------------------------------------------------------|----------------|--------------------|---------------|
| Bond precision:                                               | C-C = 0.0034 Å | Wavelength=0.71073 |               |
| Cell:                                                         | a=12.7451(8)   | b=6.2244(4)        | c=17.4968(10) |
|                                                               | alpha=90       | beta=90            | gamma=90      |
| Temperature:                                                  | 298 K          |                    |               |
|                                                               | Calculated     | Reported           |               |
| Volume                                                        | 1388.03(15)    | 1388.03(15)        |               |
| Space group                                                   | P c a 21       | P c a 21           |               |
| Hall group                                                    | P 2c -2ac      | P 2c -2ac          |               |
| Moiety formula                                                | C15 H12 N2 S2  | C15 H12 N2 S2      |               |
| Sum formula                                                   | C15 H12 N2 S2  | C15 H12 N2 S2      |               |
| Mr                                                            | 284.39         | 284.39             |               |
| Dx, g cm <sup>-3</sup>                                        | 1.361          | 1.361              |               |
| Z                                                             | 4              | 4                  |               |
| Mu (mm <sup>-1</sup> )                                        | 0.370          | 0.370              |               |
| F000                                                          | 592.0          | 592.0              |               |
| F000'                                                         | 593.15         |                    |               |
| h, k, lmax                                                    | 17, 8, 23      | 17, 8, 23          |               |
| Nref                                                          | 3468[ 1791]    | 3339               |               |
| Tmin, Tmax                                                    | 0.911, 0.936   | 0.695, 0.746       |               |
| Tmin'                                                         | 0.908          |                    |               |
| Correction method= # Reported T Limits: Tmin=0.695 Tmax=0.746 |                |                    |               |
| AbsCorr = MULTI-SCAN                                          |                |                    |               |
| Data completeness=                                            | 1.86/0.96      | Theta(max)= 28.338 |               |
| R(reflections)=                                               | 0.0428( 2653)  | wR2(reflections)=  |               |
| S =                                                           | 1.086          | 0.0953( 3339)      |               |
|                                                               | Npar= 148      |                    |               |

Add compound **5h** (48mg) to a 10mL sample bottle, add DCM (2mL), n-hexane (2mL) and toluene (1mL), seal the bottle with a parafilm, poke 15 small holes on the parafilm, Place the sample bottle in a safe place to allow it to volatilize and separate out the single crystal. Take out the single crystal and send it to the relevant test center for single crystal diffraction test to obtain relevant data. Instrument model: Bruker Apex 2. At the temperature of 298(2)K, the Mo-K $\alpha$  radiation monochromated by the graphite monochromator ( $\lambda = 0.71073 \text{ \AA}$ ), use the  $\varphi$ - $\omega$  scanning method to collect all data in the range of  $2.09 < \theta < 25.01^\circ$ , and use BRUKER SAINT restores the data and performs absorption correction on the diffraction data through the SADABS program. Using SHELXTL software, the crystal structure was solved by the direct method. The coordinates of all non-hydrogen atoms and their anisotropic thermal parameters are corrected by the full matrix least square method. Theoretically add the hydrogen atom on the C atom and use the fixed isotropic thermal parameters to modify the structure to determine its coordinates, while the hydrogen atom coordinates on the water molecule are determined by several rounds of difference Fourier synthesis.

## X-ray Structure and Data of **8i**

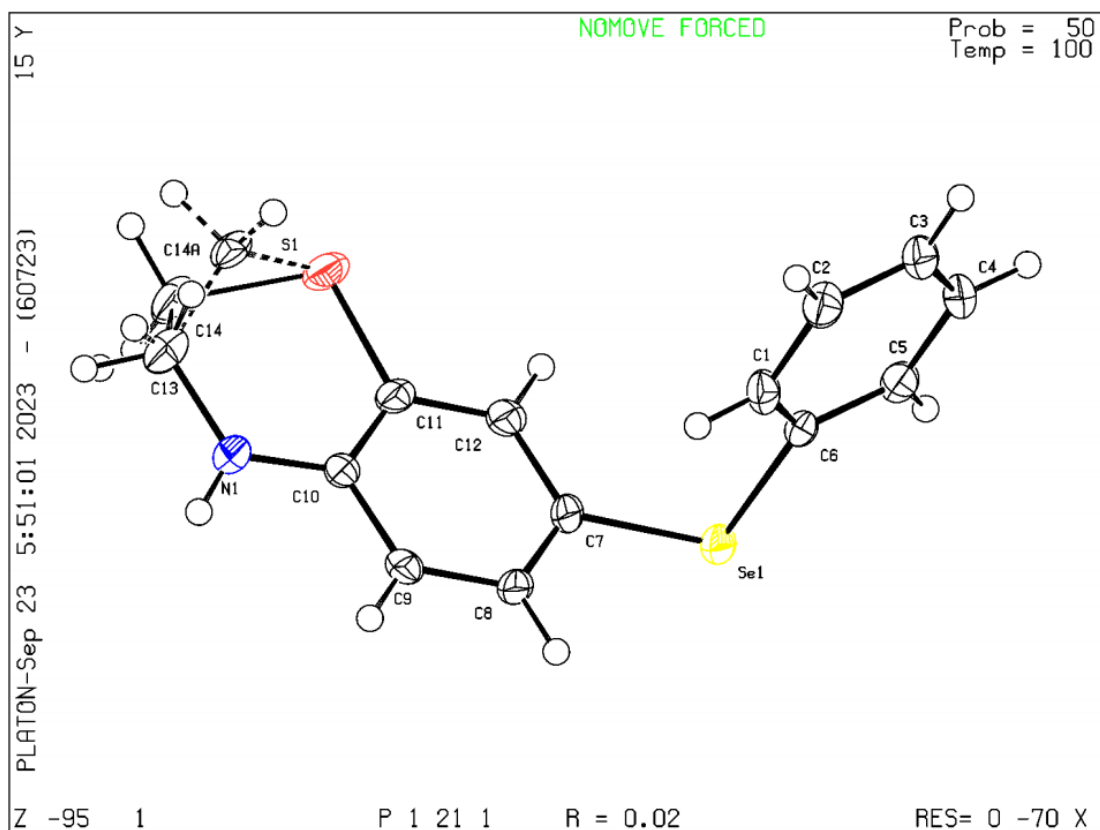

The ellipsoid contour percent probability level is 50% in the caption of the thermal ellipsoid plot.

**Figure S6.** X-Ray crystal structure of **8i**

**Table S22.** Crystal data and structure refinement for **8i****Datablock: 1**

|                                                               |                |                    |              |
|---------------------------------------------------------------|----------------|--------------------|--------------|
| Bond precision:                                               | C-C = 0.0048 Å | Wavelength=0.71073 |              |
| Cell:                                                         | a=9.8644(6)    | b=5.9135(3)        | c=10.9549(6) |
|                                                               | alpha=90       | beta=103.916(2)    | gamma=90     |
| Temperature:                                                  | 100 K          |                    |              |
|                                                               | Calculated     | Reported           |              |
| Volume                                                        | 620.28(6)      | 620.28(6)          |              |
| Space group                                                   | P 21           | P 1 21 1           |              |
| Hall group                                                    | P 2yb          | P 2yb              |              |
| Moiety formula                                                | C14 H13 N S Se | C14 H13 N S Se     |              |
| Sum formula                                                   | C14 H13 N S Se | C14 H13 N S Se     |              |
| Mr                                                            | 306.27         | 306.27             |              |
| Dx, g cm <sup>-3</sup>                                        | 1.640          | 1.640              |              |
| Z                                                             | 2              | 2                  |              |
| Mu (mm <sup>-1</sup> )                                        | 3.170          | 3.170              |              |
| F000                                                          | 308.0          | 308.0              |              |
| F000'                                                         | 308.15         |                    |              |
| h, k, lmax                                                    | 13, 7, 14      | 13, 7, 14          |              |
| Nref                                                          | 3101[ 1697]    | 2787               |              |
| Tmin, Tmax                                                    | 0.472, 0.530   | 0.516, 0.746       |              |
| Tmin'                                                         | 0.463          |                    |              |
| Correction method= # Reported T Limits: Tmin=0.516 Tmax=0.746 |                |                    |              |
| AbsCorr = MULTI-SCAN                                          |                |                    |              |
| Data completeness=                                            | 1.64/0.90      | Theta(max)= 28.354 |              |
| R(reflections)=                                               | 0.0248( 2604)  | wR2(reflections)=  |              |
| S = 1.031                                                     | Npar= 164      | 0.0543( 2787)      |              |

Add compound **8i** (66mg) to a 10mL sample bottle, add DCM (2mL), n-hexane (2mL) and toluene (1mL), seal the bottle with a parafilm, poke 15 small holes on the parafilm, Place the sample bottle in a safe place to allow it to volatilize and separate out the single crystal. Take out the single crystal and send it to the relevant test center for single crystal diffraction test to obtain relevant data. Instrument model: Bruker Apex 2. At the temperature of 298(2) K, the Mo-K $\alpha$  radiation monochromated by the graphite monochromator ( $\lambda = 0.71073 \text{ \AA}$ ), use the  $\varphi$ - $\omega$  scanning method to collect all data in the range of  $2.09 < \theta < 25.01^\circ$ , and use BRUKER SAINT restores the data and performs absorption correction on the diffraction data through the SADABS program. Using SHELXTL software, the crystal structure was solved by the direct method. The coordinates of all non-hydrogen atoms and their anisotropic thermal parameters are corrected by the full matrix least square method. Theoretically add the hydrogen atom on the C atom and use the fixed isotropic thermal parameters to modify the structure to determine its coordinates, while the hydrogen atom coordinates on the water molecule are determined by several rounds of difference Fourier synthesis.

## X-ray Structure and Data of **9a**

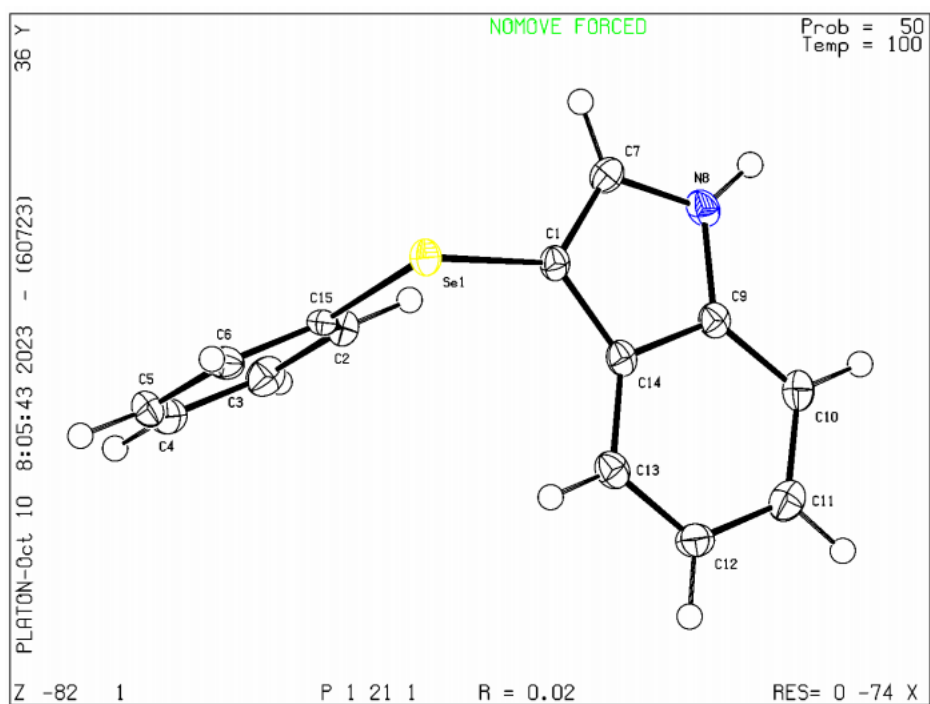

The ellipsoid contour percent probability level is 50% in the caption of the thermal ellipsoid plot.

**Figure S7.** X-Ray crystal structure of **9a**

**Table S3.** Crystal data and structure refinement for **9a****Datablock: 1**

|                                                               |                 |                    |              |
|---------------------------------------------------------------|-----------------|--------------------|--------------|
| Bond precision:                                               | C-C = 0.0043 Å  | Wavelength=0.71073 |              |
| Cell:                                                         | a=9.7784 (6)    | b=5.9088 (3)       | c=9.9458 (6) |
|                                                               | alpha=90        | beta=102.121 (2)   | gamma=90     |
| Temperature:                                                  | 100 K           |                    |              |
|                                                               | Calculated      | Reported           |              |
| Volume                                                        | 561.84 (6)      | 561.84 (6)         |              |
| Space group                                                   | P 21            | P 1 21 1           |              |
| Hall group                                                    | P 2yb           | P 2yb              |              |
| Moiety formula                                                | C14 H11 N Se    | C14 H11 N Se       |              |
| Sum formula                                                   | C14 H11 N Se    | C14 H11 N Se       |              |
| Mr                                                            | 272.20          | 272.20             |              |
| Dx, g cm <sup>-3</sup>                                        | 1.609           | 1.609              |              |
| Z                                                             | 2               | 2                  |              |
| Mu (mm <sup>-1</sup> )                                        | 3.310           | 3.310              |              |
| F000                                                          | 272.0           | 272.0              |              |
| F000'                                                         | 271.90          |                    |              |
| h, k, lmax                                                    | 13, 7, 13       | 13, 7, 13          |              |
| Nref                                                          | 2787 [ 1526 ]   | 2782               |              |
| Tmin, Tmax                                                    | 0.494, 0.589    | 0.624, 0.746       |              |
| Tmin'                                                         | 0.447           |                    |              |
| Correction method= # Reported T Limits: Tmin=0.624 Tmax=0.746 |                 |                    |              |
| AbsCorr = MULTI-SCAN                                          |                 |                    |              |
| Data completeness=                                            | 1.82/1.00       | Theta(max)= 28.285 |              |
| R(reflections)=                                               | 0.0208 ( 2608 ) | wR2(reflections)=  |              |
| S = 1.067                                                     | Npar= 145       | 0.0428 ( 2782 )    |              |

Add compound **9a** (75mg) to a 10mL sample bottle, add DCM (2mL), n-hexane (2mL) and toluene (1mL), seal the bottle with a parafilm, poke 15 small holes on the parafilm, Place the sample bottle in a safe place to allow it to volatilize and separate out the single crystal. Take out the single crystal and send it to the relevant test center for single crystal diffraction test to obtain relevant data. Instrument model: Bruker Apex 2. At the temperature of 298(2)K, the Mo-K $\alpha$  radiation monochromated by the graphite monochromator ( $\lambda = 0.71073 \text{ \AA}$ ), use the  $\varphi$ - $\omega$  scanning method to collect all data in the range of  $2.09 < \theta < 25.01^\circ$ , and use BRUKER SAINT restores the data and performs absorption correction on the diffraction data through the SADABS program. Using SHELXTL software, the crystal structure was solved by the direct method. The coordinates of all non-hydrogen atoms and their anisotropic thermal parameters are corrected by the full matrix least square method. Theoretically add the hydrogen atom on the C atom and use the fixed isotropic thermal parameters to modify the structure to determine its coordinates, while the hydrogen atom coordinates on the water molecule are determined by several rounds of difference Fourier synthesis.

7.  $^1\text{H}$  NMR and  $^{13}\text{C}$  NMR spectra of 3,5,6,8,9,10,11,12,13,15.

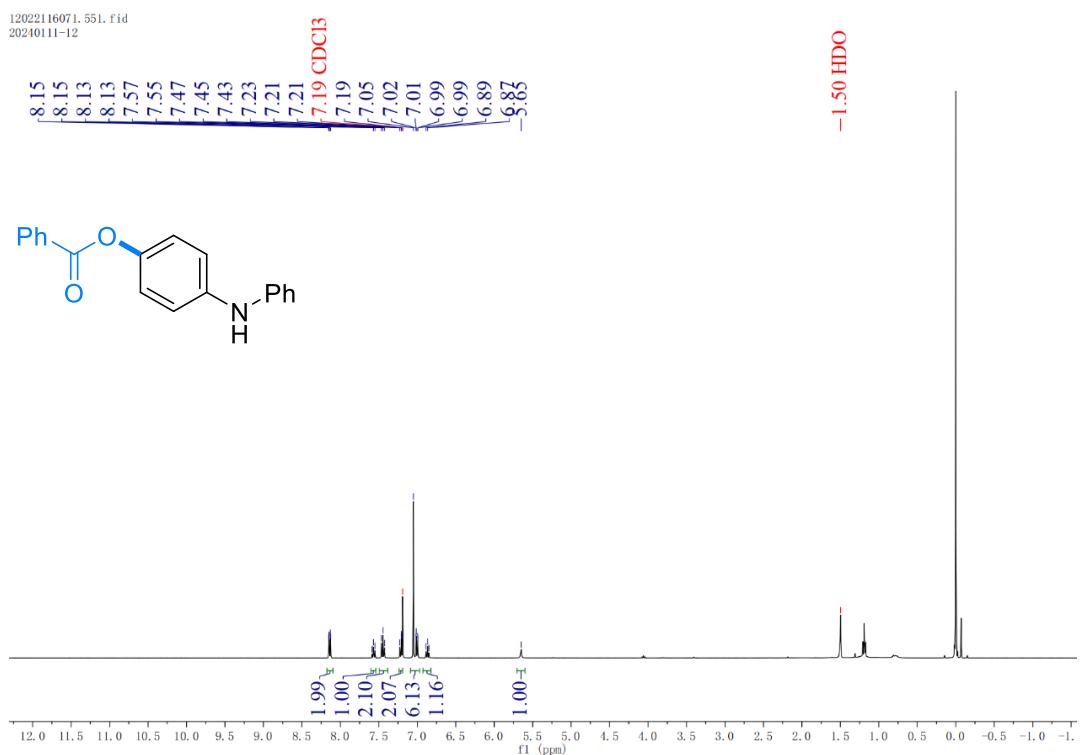

$^1\text{H}$ -NMR (400 MHz,  $\text{CDCl}_3$ ) Spectra of compound 3a

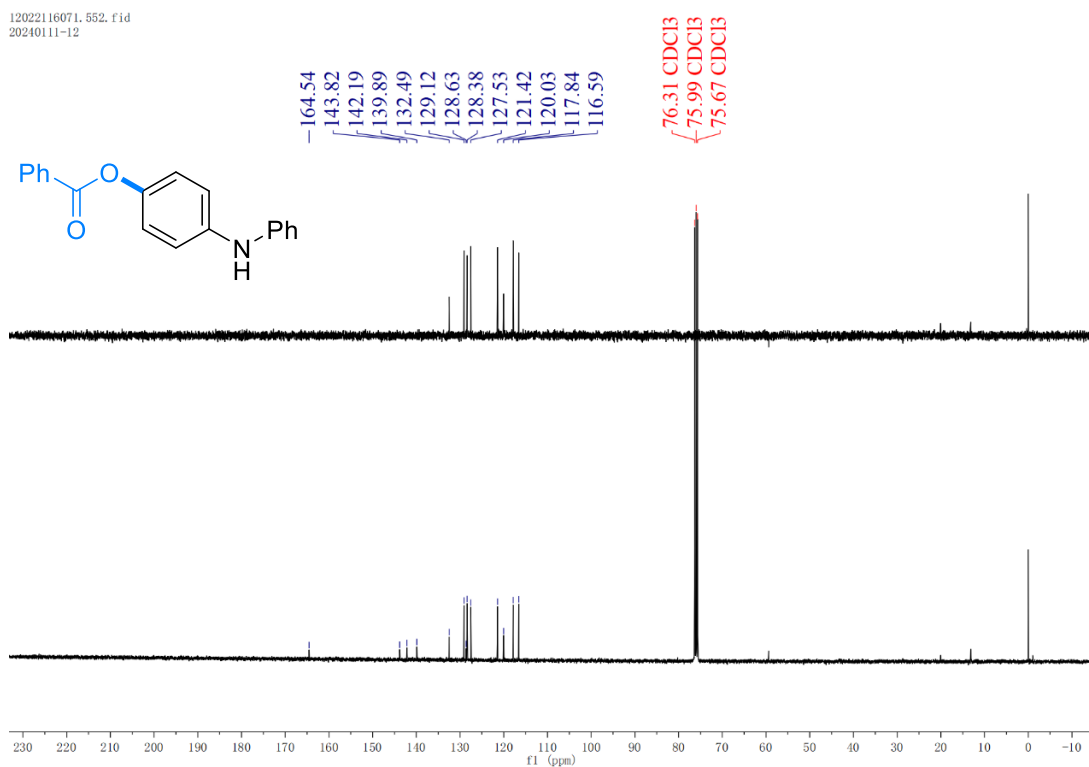

$^{13}\text{C}$ -NMR (100 MHz,  $\text{CDCl}_3$ ) Spectra of compound 3a

12022116071.279.Fid  
20241221

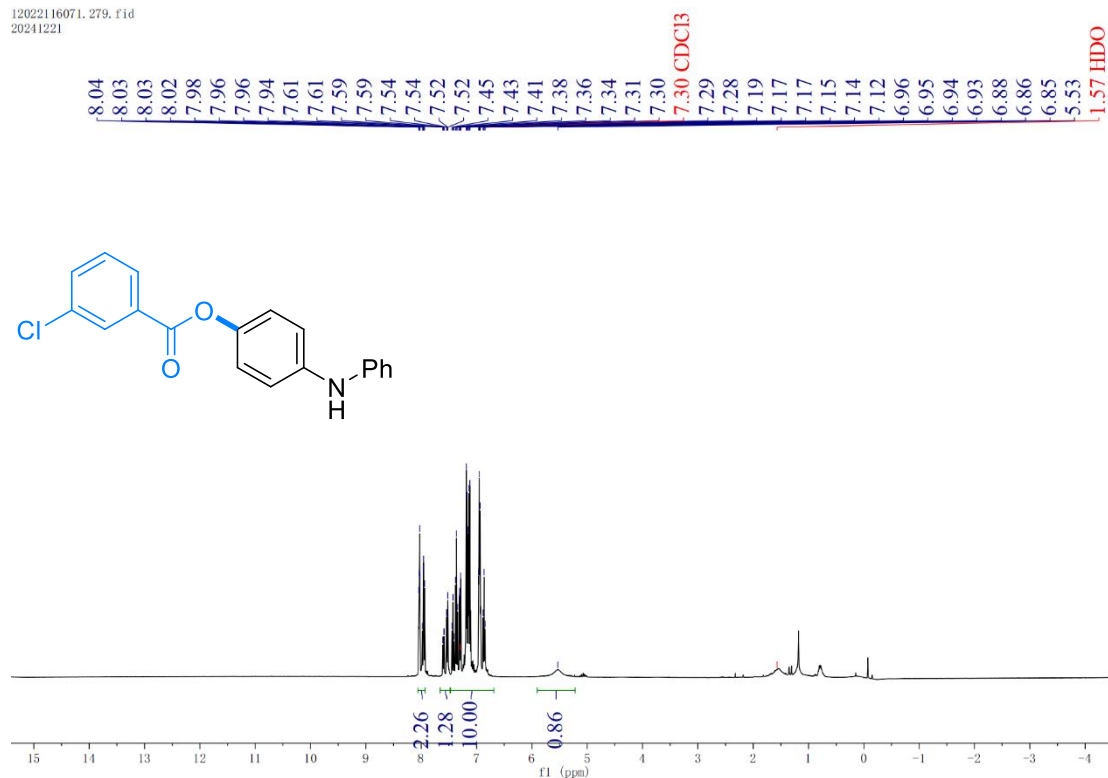

### <sup>1</sup>H-NMR (400 MHz, CDCl<sub>3</sub>) Spectra of compound 3b

12022116071.280.Fid  
20241221

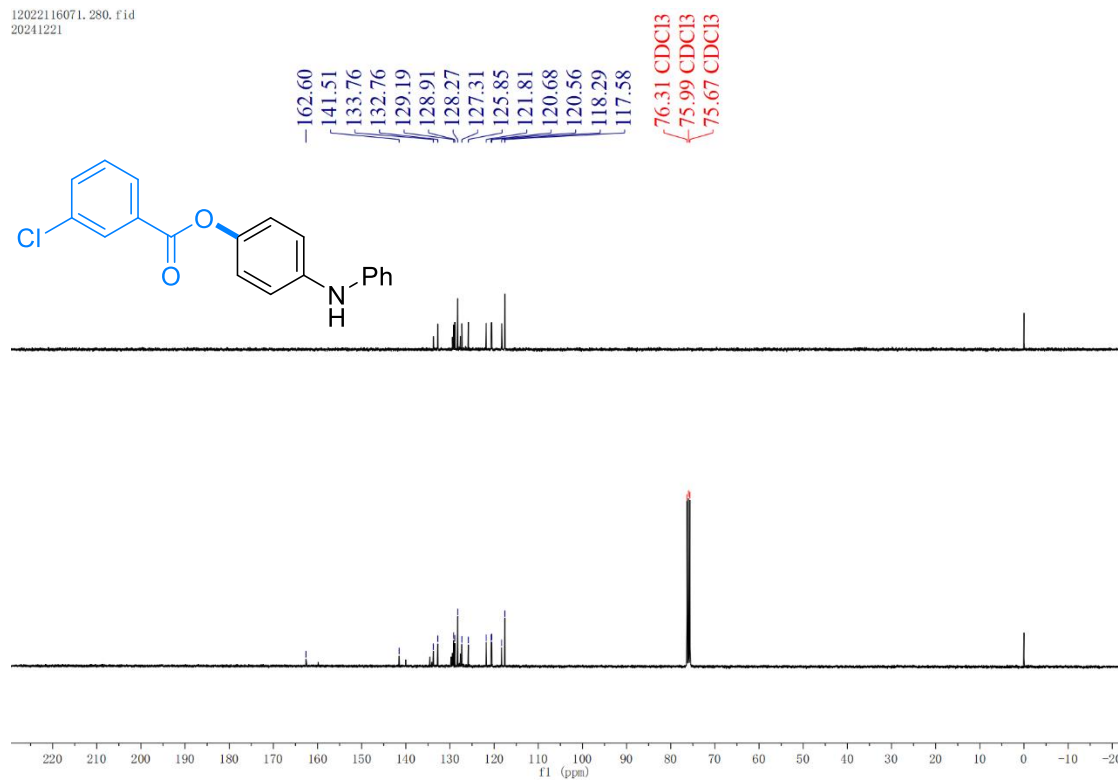

### <sup>13</sup>C-NMR (100 MHz, CDCl<sub>3</sub>) Spectra of compound 3b

12022116071.225.fid  
20240823-25

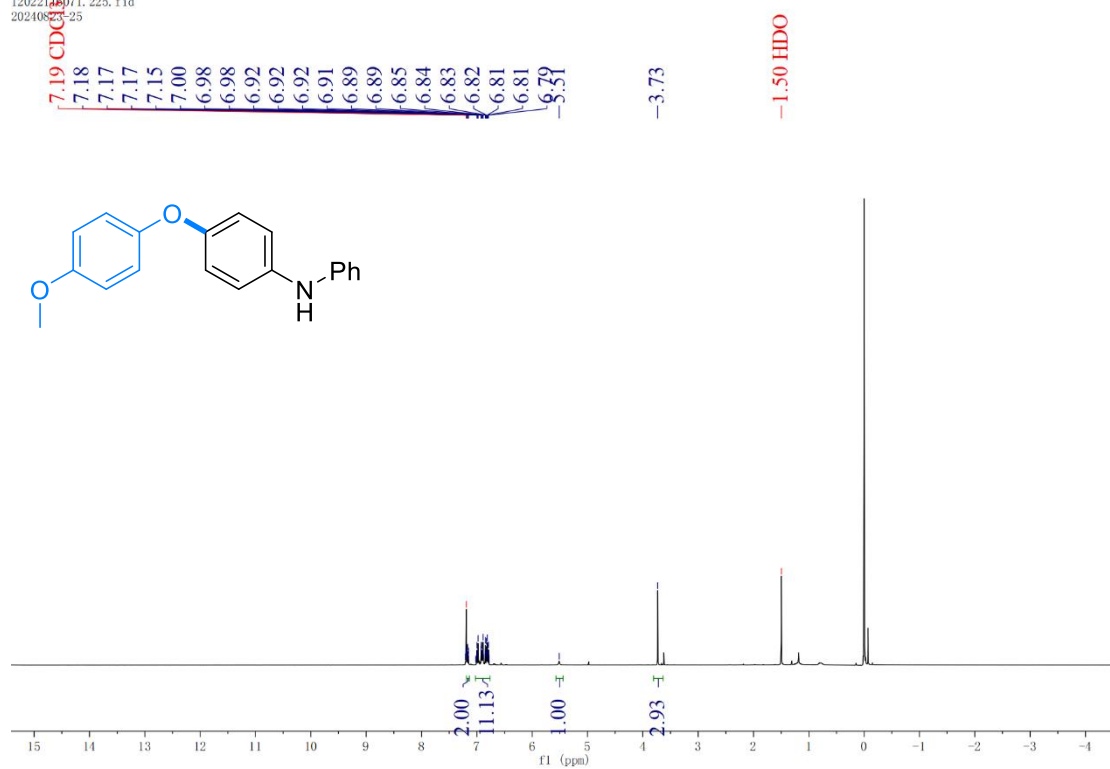

**<sup>1</sup>H-NMR (400 MHz, CDCl<sub>3</sub>) Spectra of compound 3c**

12022116071.576.fid  
20240823-25

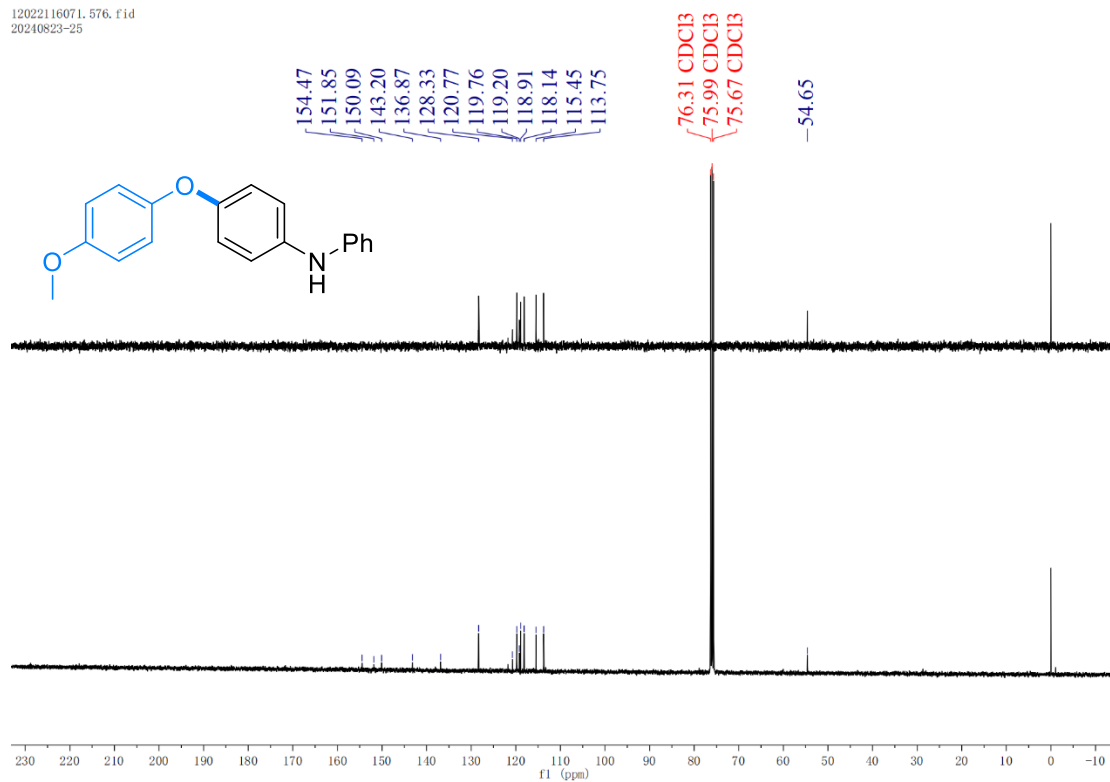

**<sup>13</sup>C-NMR (100 MHz, CDCl<sub>3</sub>) Spectra of compound 3c**



12022116071.346.fid  
20231129-3

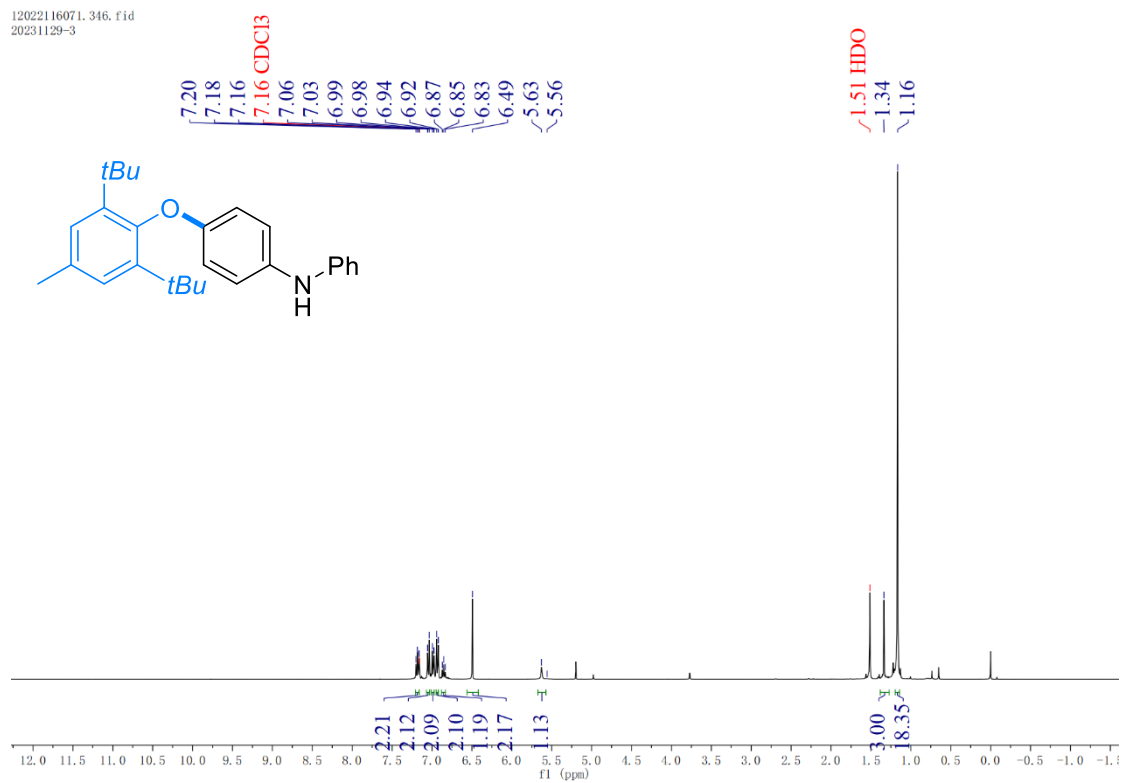

### <sup>1</sup>H-NMR (400 MHz, CDCl<sub>3</sub>) Spectra of compound 3d

12022116071.347.fid  
20231129-3

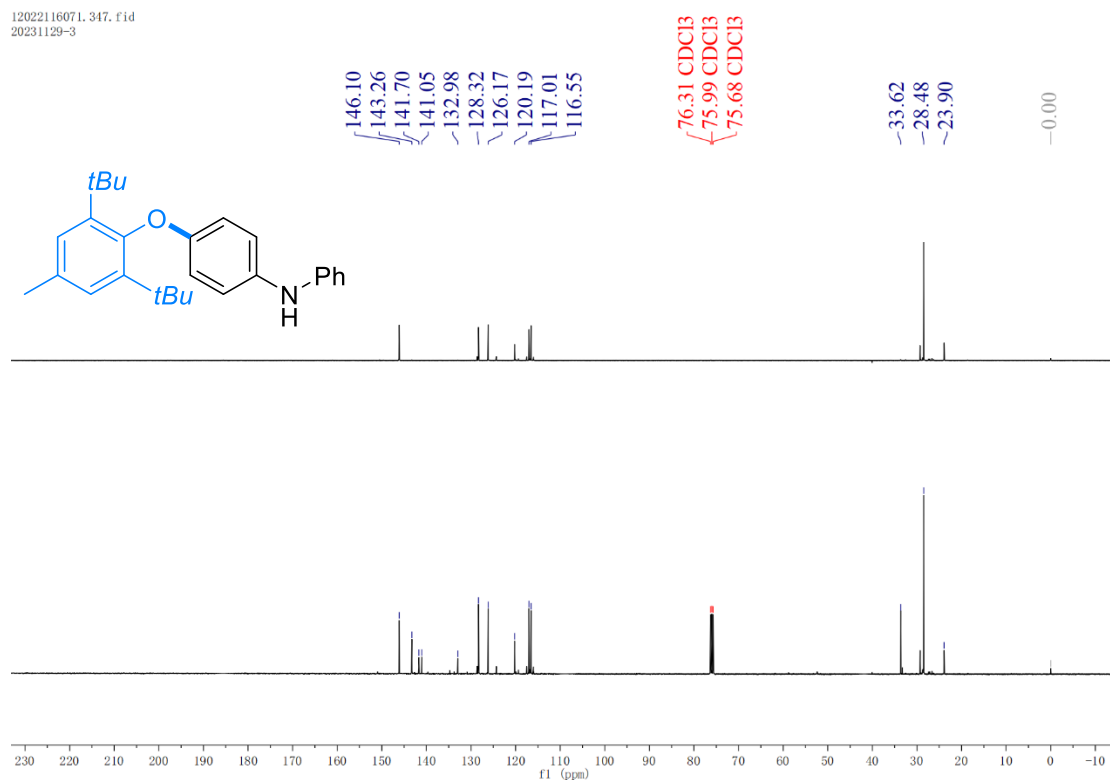

### <sup>13</sup>C-NMR (100 MHz, CDCl<sub>3</sub>) Spectra of compound 3d

12022116071\_202.fid  
20240823-11

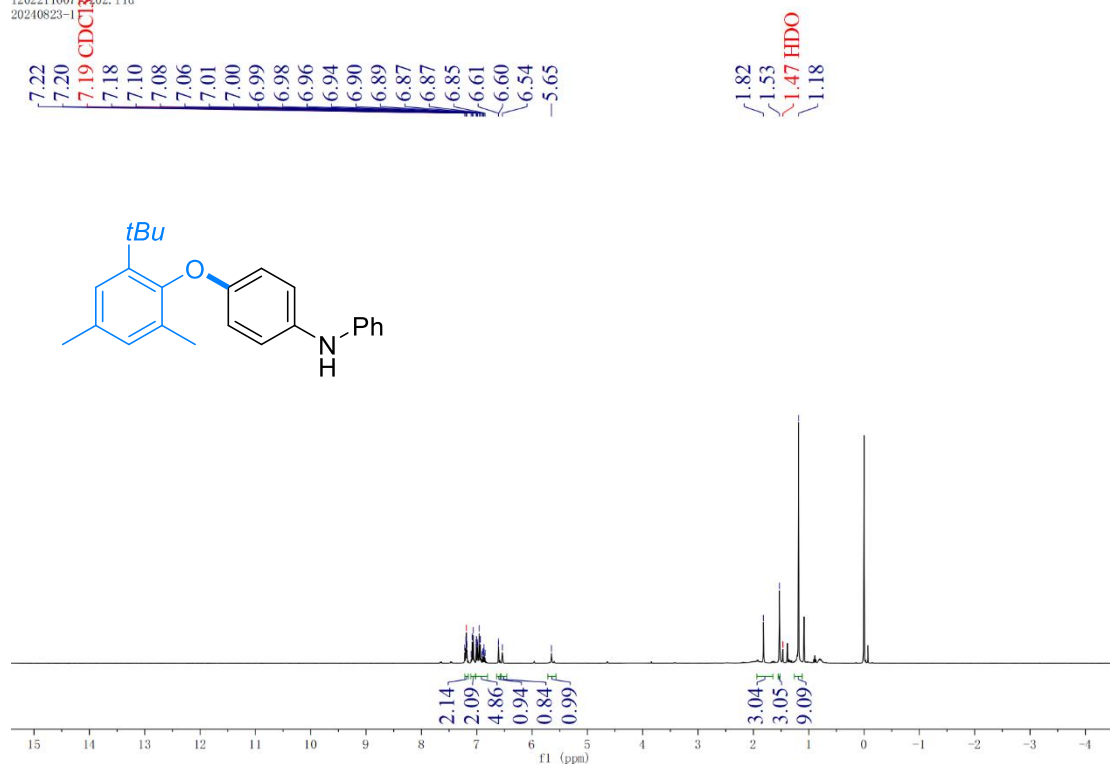

### <sup>1</sup>H-NMR (400 MHz, CDCl<sub>3</sub>) Spectra of compound 3e

12022116071\_203.fid  
20240823-11

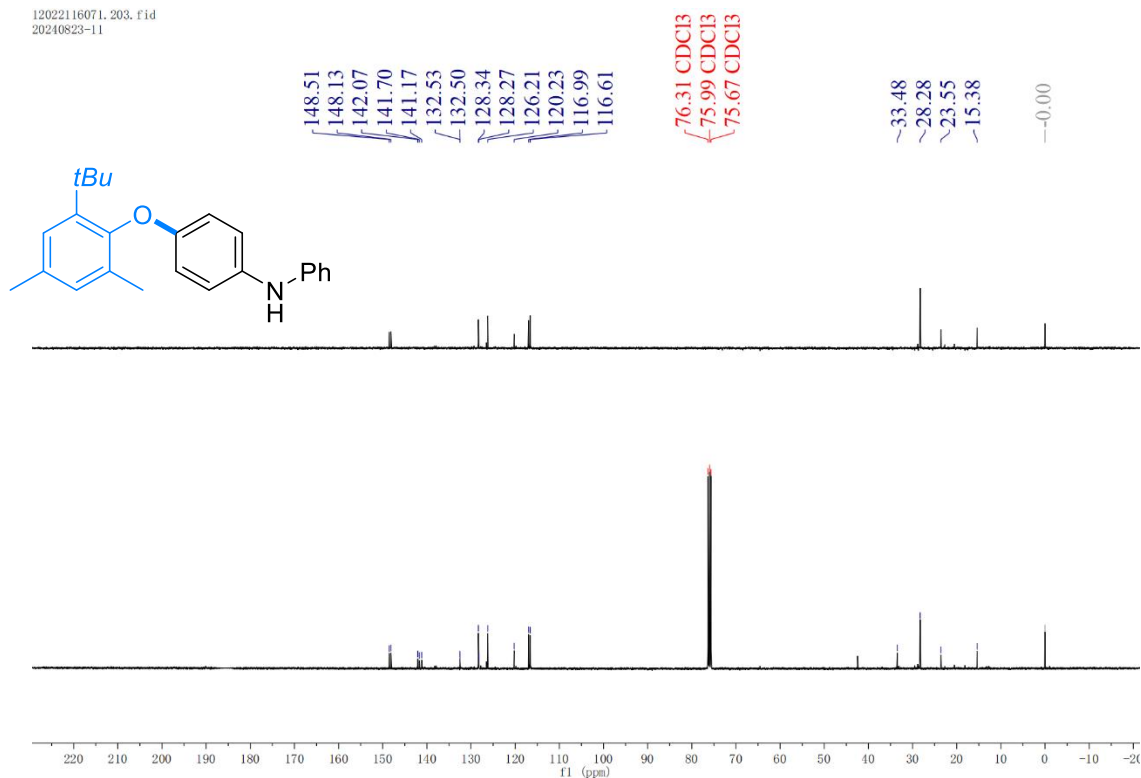

### <sup>13</sup>C-NMR (100 MHz, CDCl<sub>3</sub>) Spectra of compound 3e

12022116071.585.fid  
20240823-1

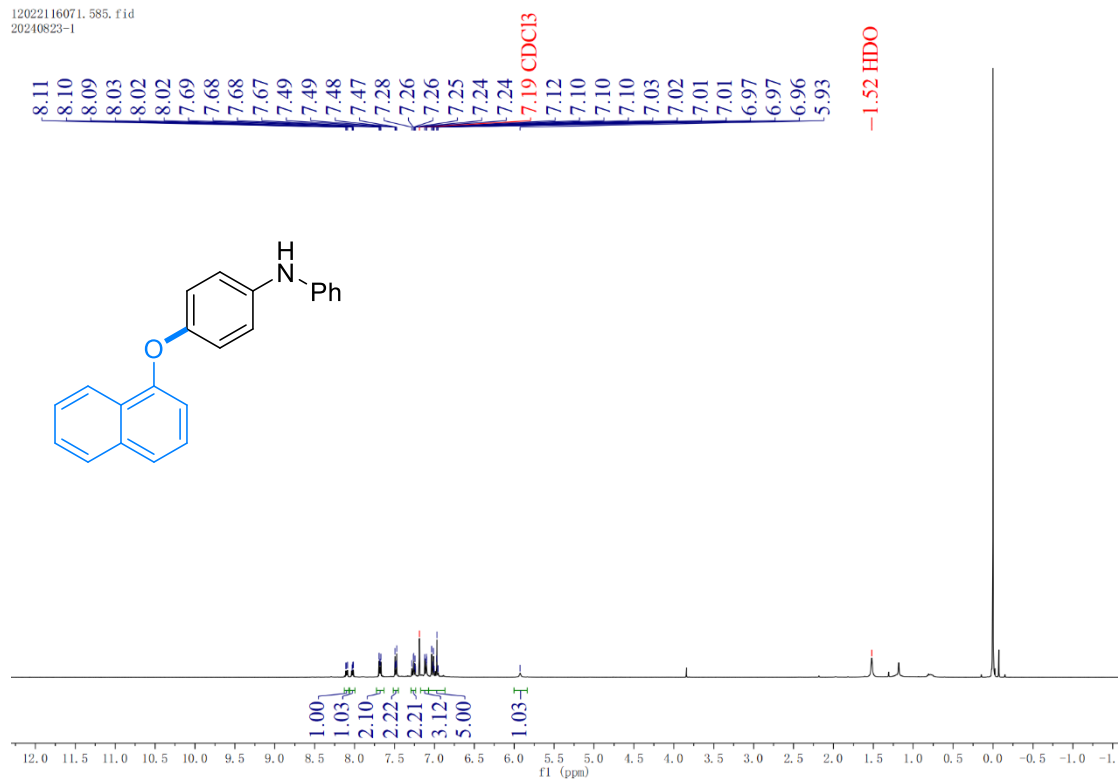

### <sup>1</sup>H-NMR (400 MHz, CDCl<sub>3</sub>) Spectra of compound 3f

12022116071.589.fid  
20240823-1

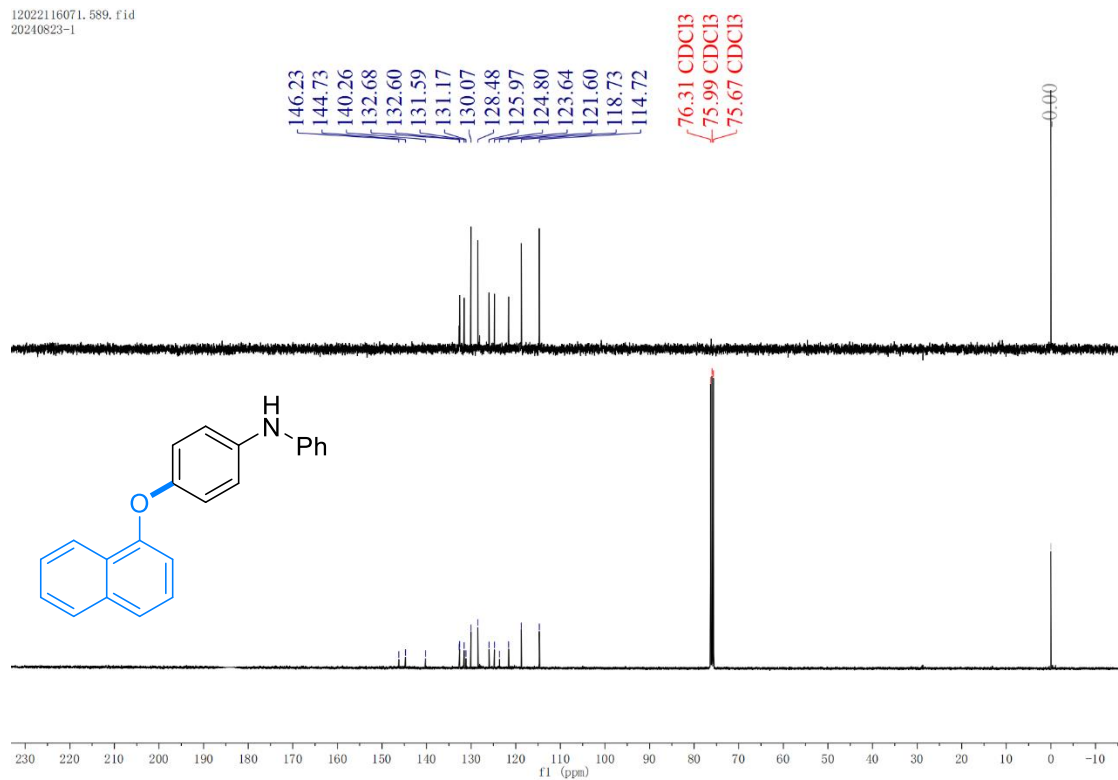

### <sup>13</sup>C-NMR (100 MHz, CDCl<sub>3</sub>) Spectra of compound 3f

12022116071.182.fid  
20230920-1

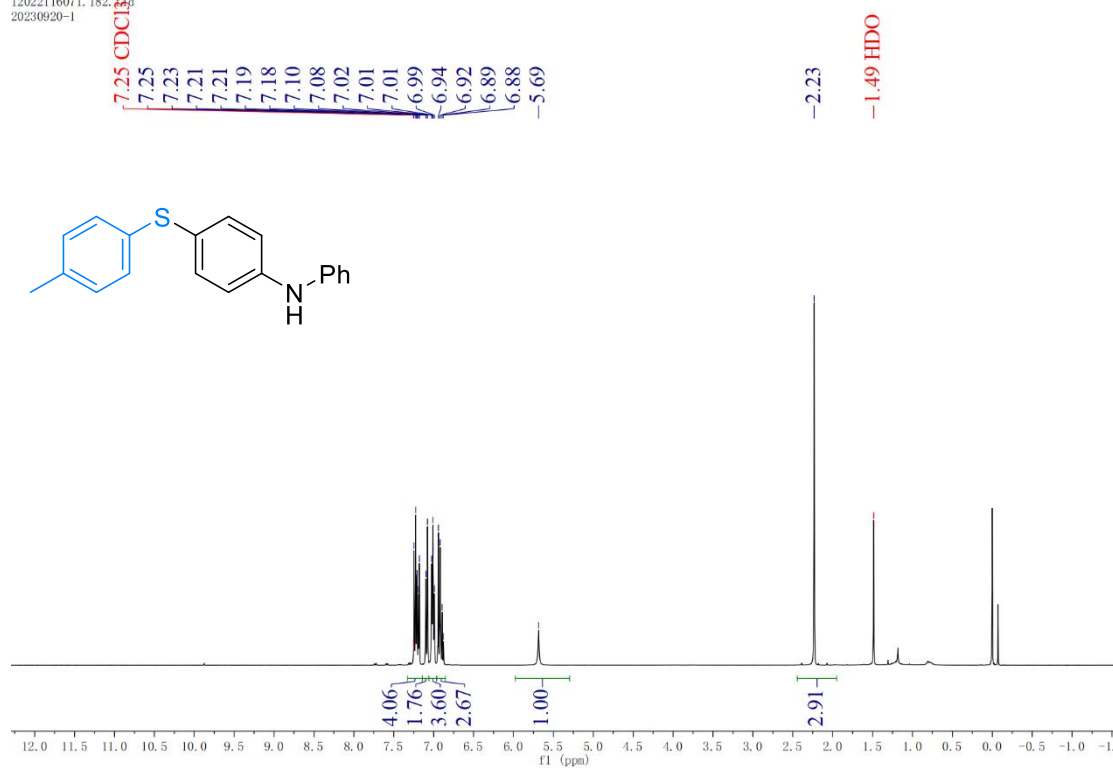

### <sup>1</sup>H-NMR (400 MHz, CDCl<sub>3</sub>) Spectra of compound 5a

12022116071.183.fid  
20230920-1

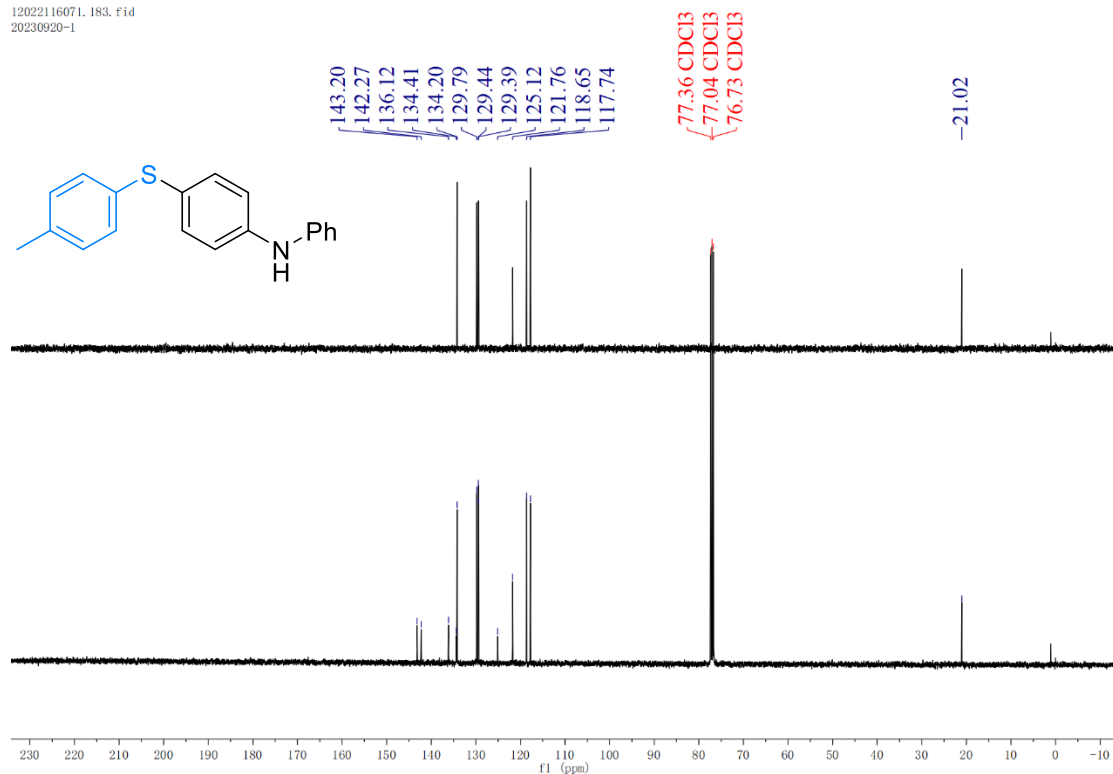

### <sup>13</sup>C-NMR (100 MHz, CDCl<sub>3</sub>) Spectra of compound 5a

12022116071\_155.fid  
20230906-3

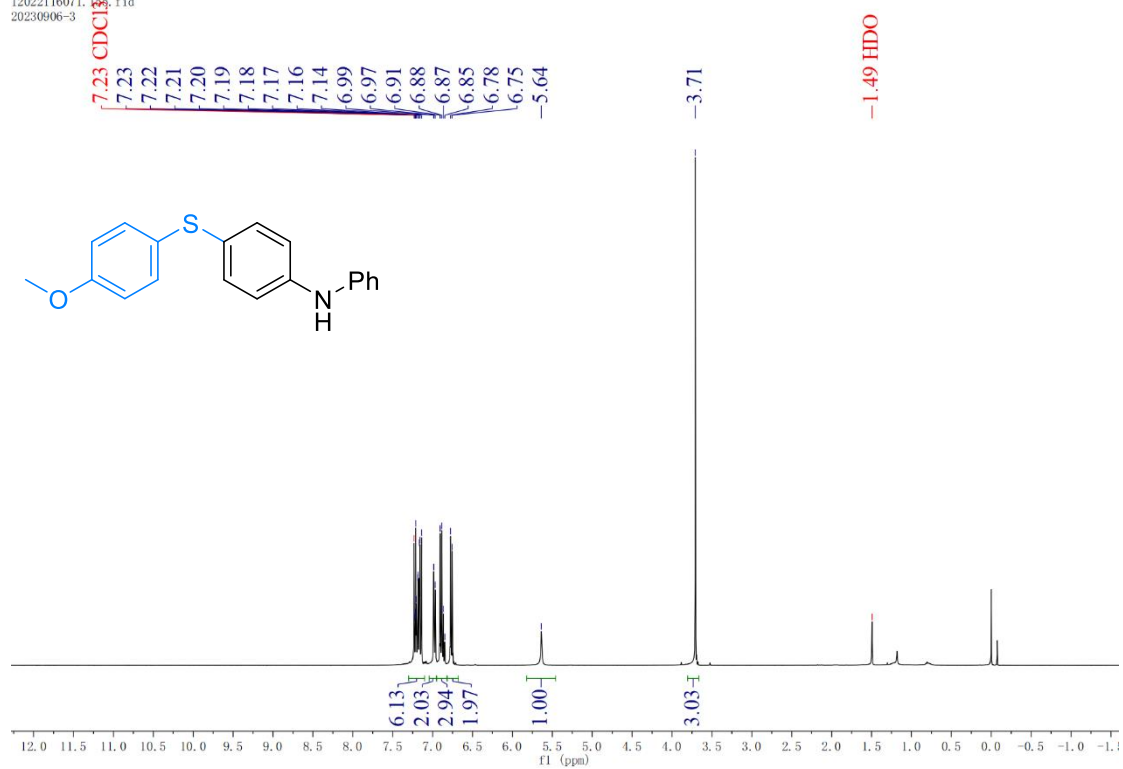

### <sup>1</sup>H-NMR (400 MHz, CDCl<sub>3</sub>) Spectra of compound 5b

12022116071\_156.fid  
20230906-3

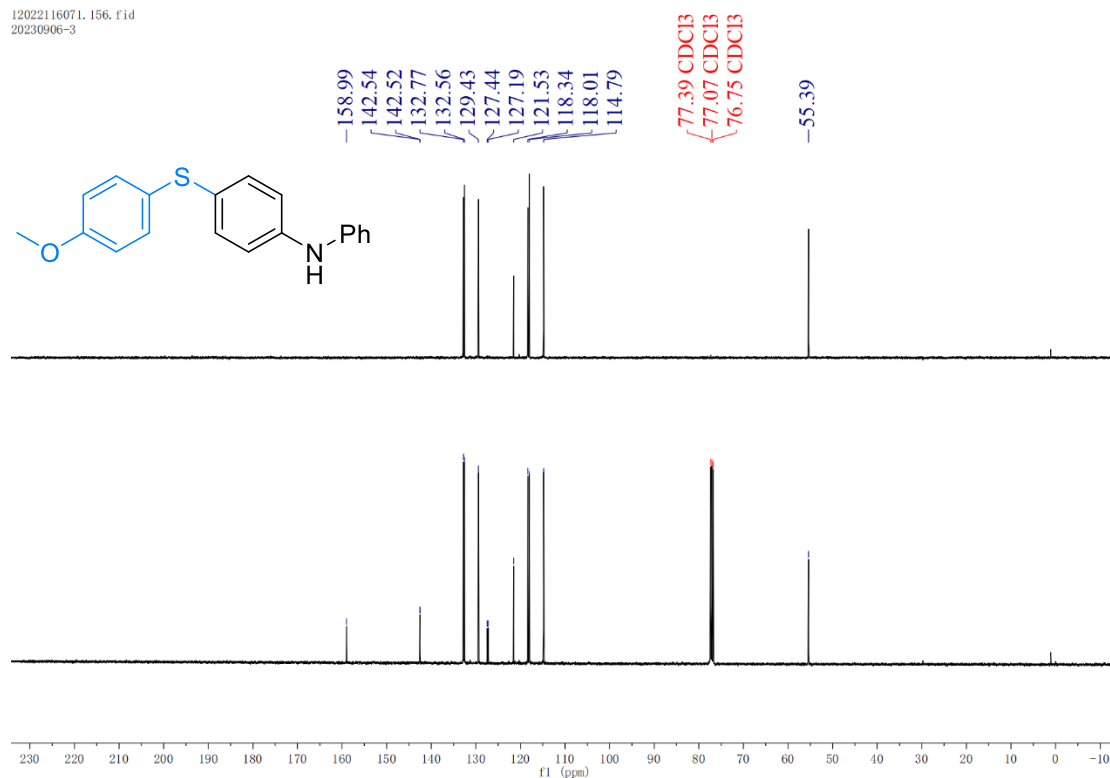

### <sup>13</sup>C-NMR (100 MHz, CDCl<sub>3</sub>) Spectra of compound 5b

12022116071.215.fid  
20230928-1

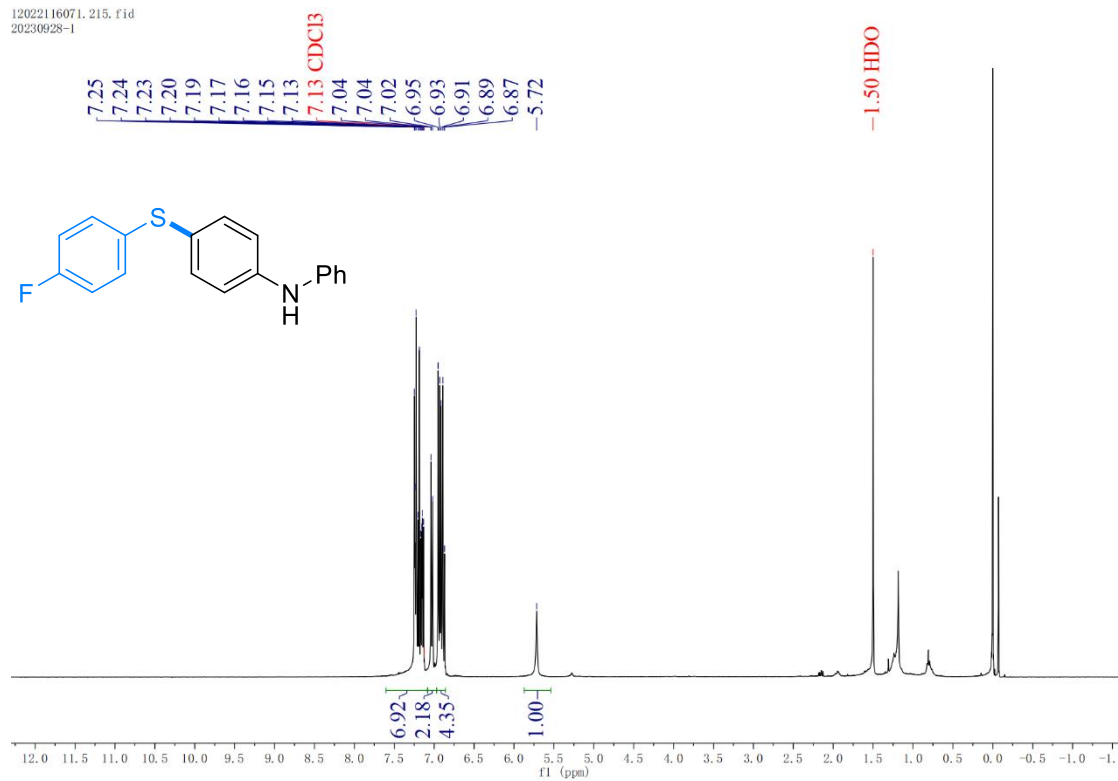

**<sup>1</sup>H-NMR (400 MHz, CDCl<sub>3</sub>) Spectra of compound 5c**

12022116071.216.fid  
20230928-1

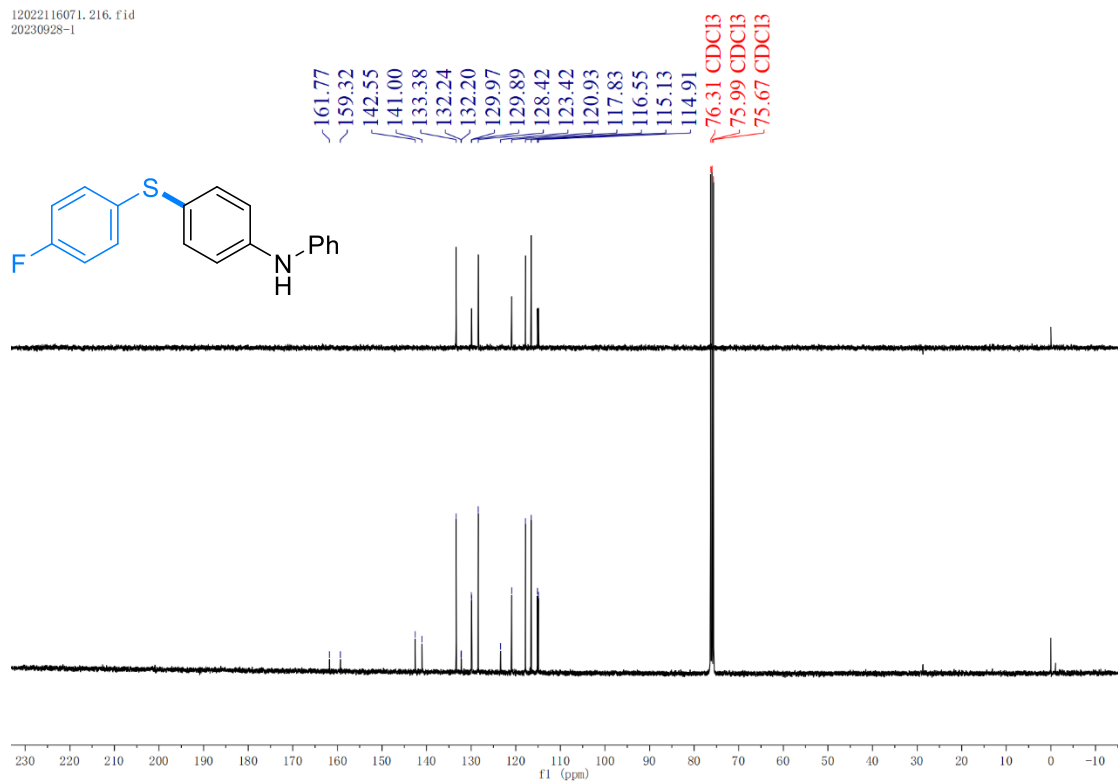

**<sup>13</sup>C-NMR (100 MHz, CDCl<sub>3</sub>) Spectra of compound 5c**

12022116071.53.fid  
20230928-1

-116.29

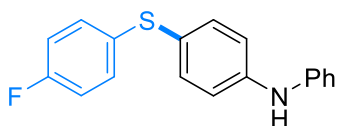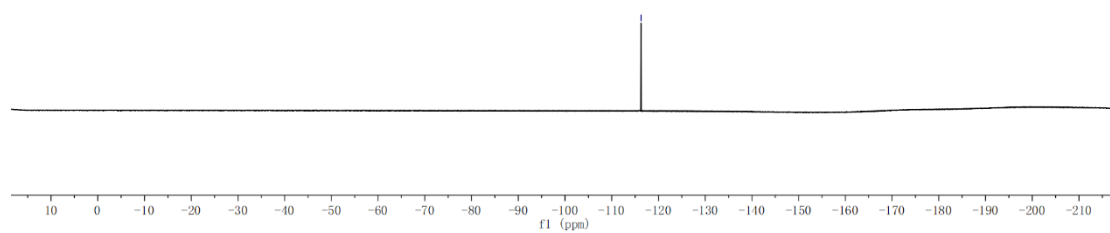

### $^{19}\text{F}$ NMR (376 MHz, $\text{CDCl}_3$ ) Spectrum of compound 5c

12022116071.191.fid  
20230921-1

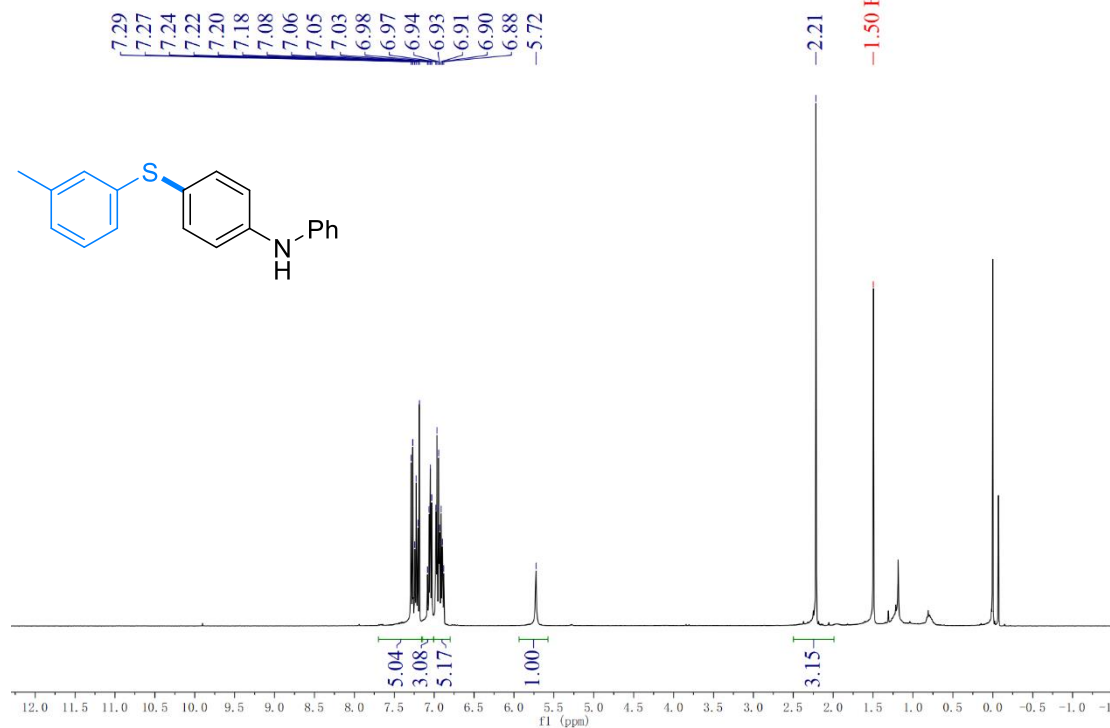

### $^1\text{H}$ -NMR (400 MHz, $\text{CDCl}_3$ ) Spectra of compound 5d

12022116071.192.fid  
20230921-1

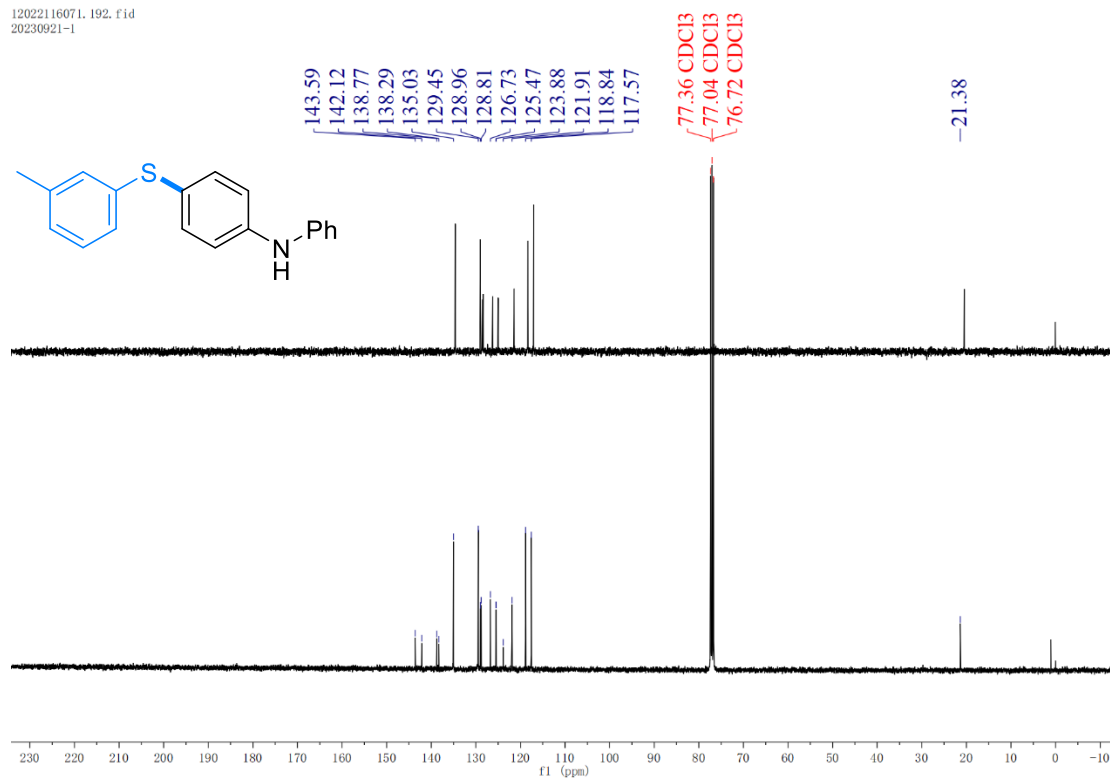

<sup>13</sup>C-NMR (100 MHz, CDCl<sub>3</sub>) Spectra of compound 5d

12022116071.239.fid  
20231010-1

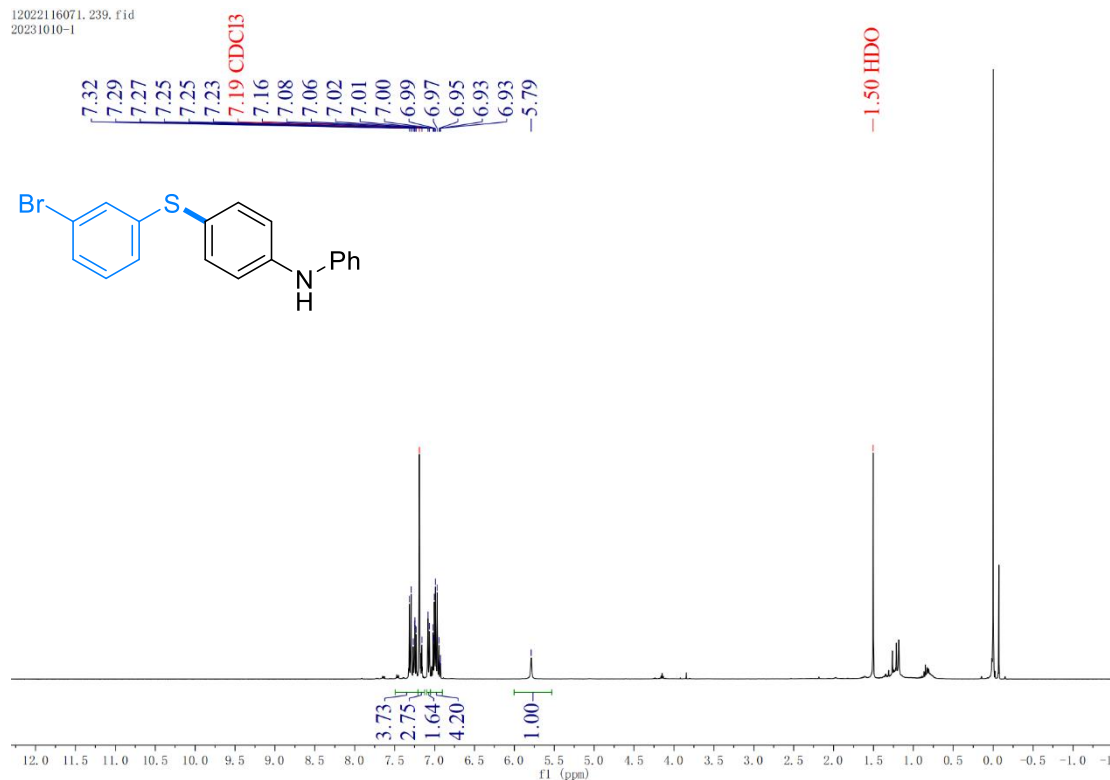

<sup>1</sup>H-NMR (400 MHz, CDCl<sub>3</sub>) Spectra of compound 5e



12022116071.240.fid  
20231010-1

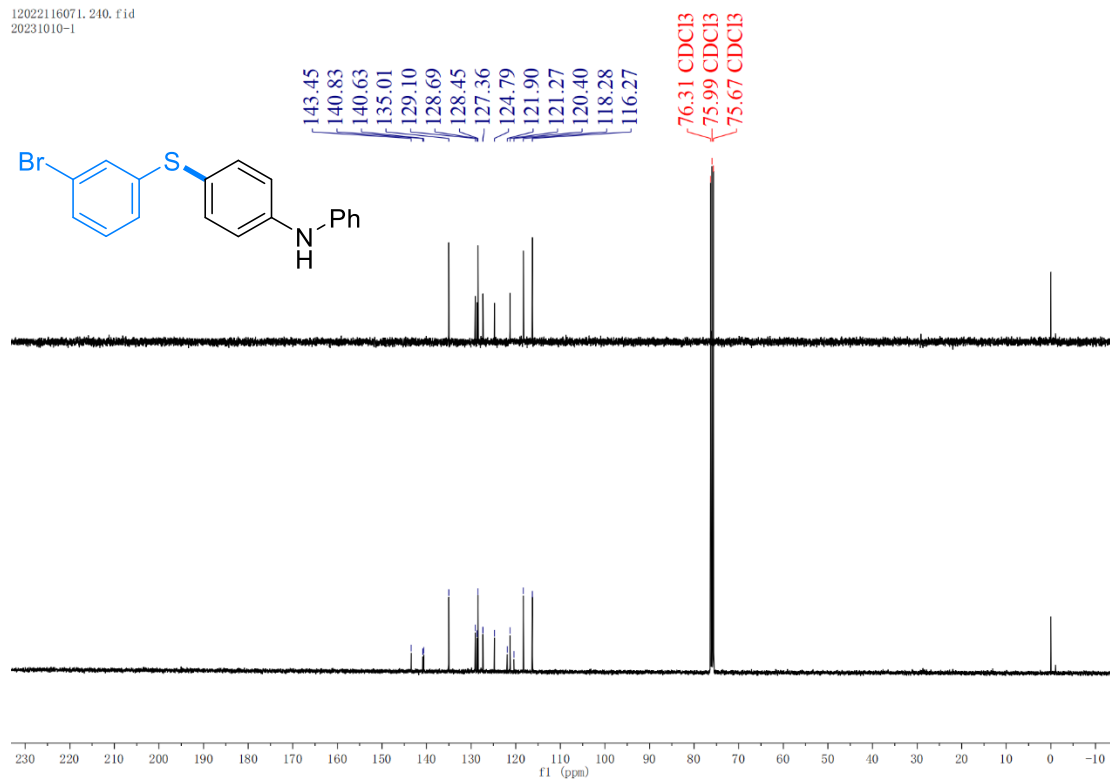

<sup>13</sup>C-NMR (100 MHz, CDCl<sub>3</sub>) Spectra of compound 5e

12022116071.194.fid  
20230921-2

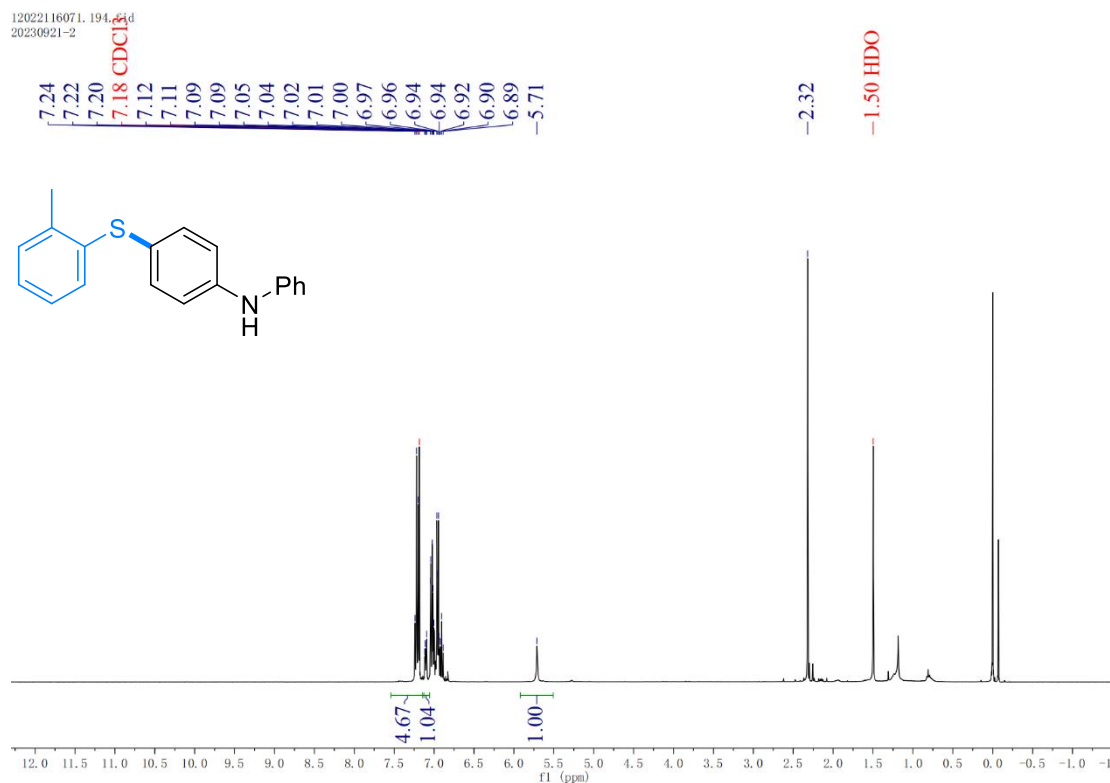

<sup>1</sup>H-NMR (400 MHz, CDCl<sub>3</sub>) Spectra of compound 5f

12022116071\_195.fid  
20230921-2

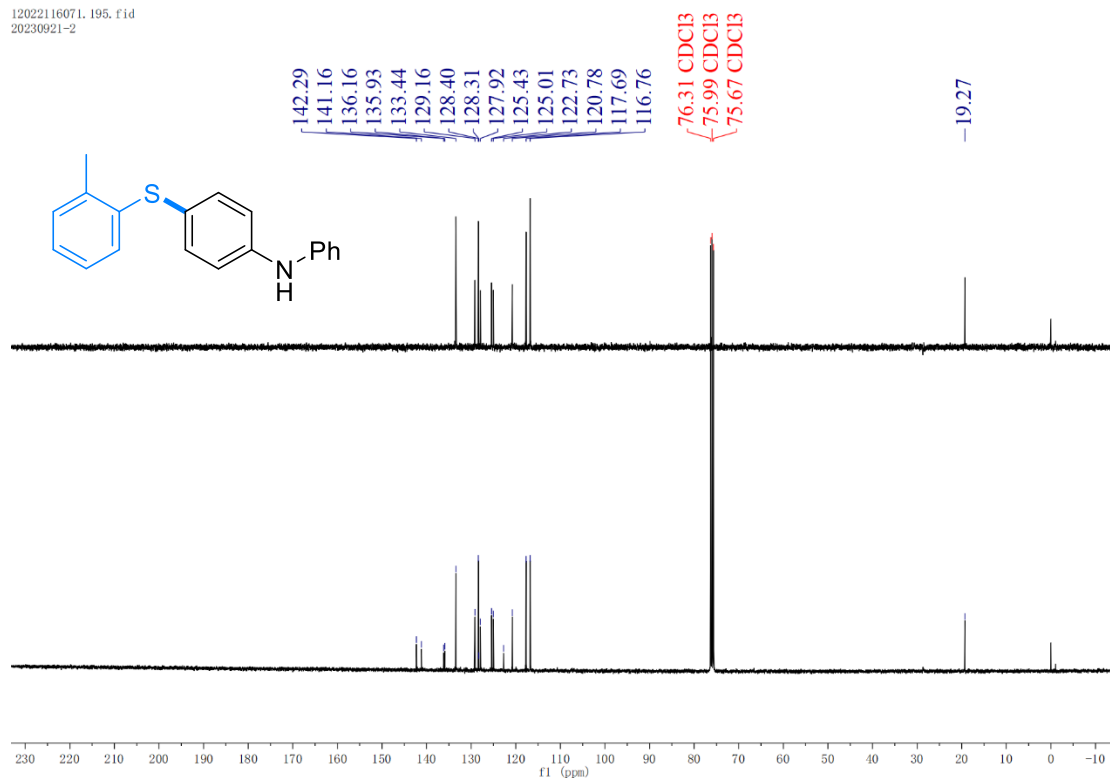

<sup>13</sup>C-NMR (100 MHz, CDCl<sub>3</sub>) Spectra of compound 5f

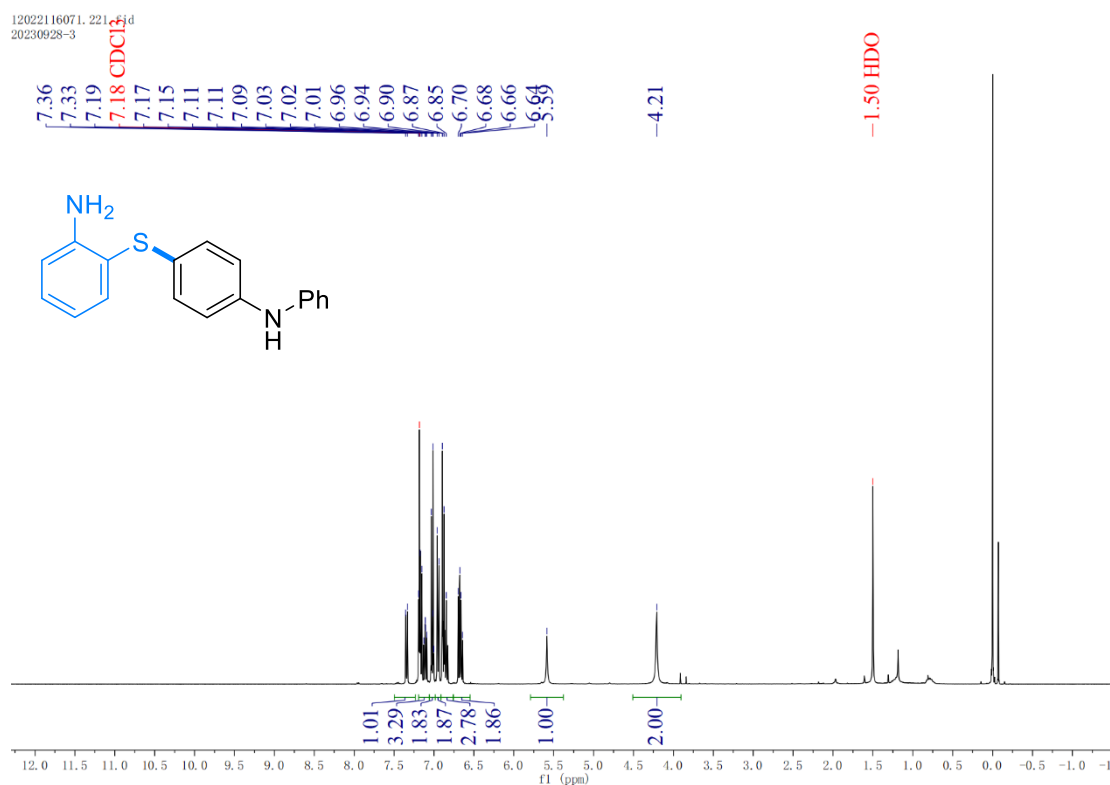

<sup>1</sup>H-NMR (400 MHz, CDCl<sub>3</sub>) Spectra of compound 5g

12022116071.222.fid  
20230928-3

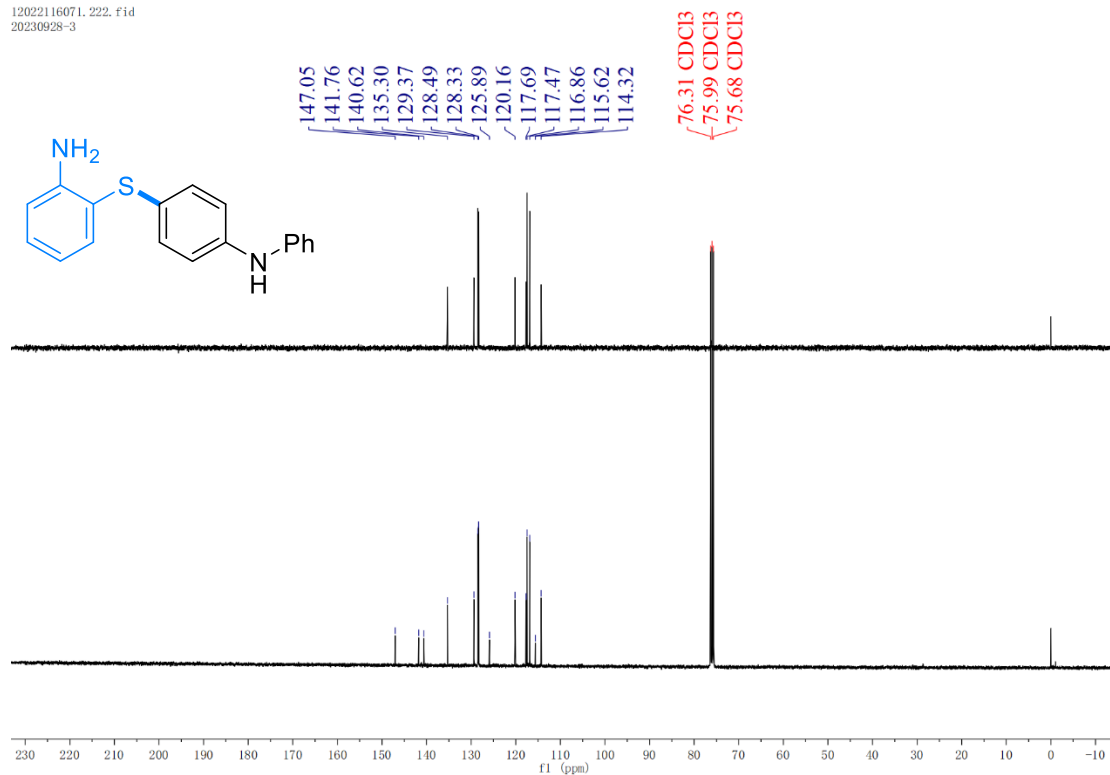

<sup>13</sup>C-NMR (100 MHz, CDCl<sub>3</sub>) Spectra of compound 5g

12022116071.364.fid  
20231218-1-2

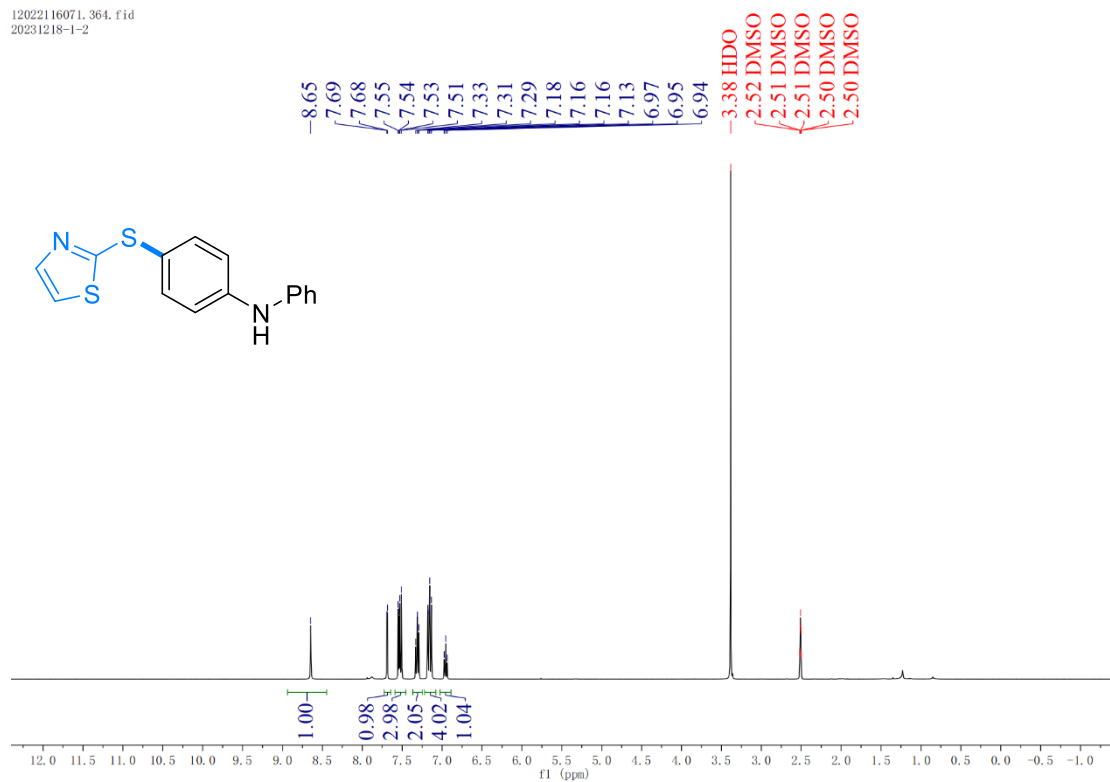

<sup>1</sup>H-NMR (400 MHz, DMSO-d<sub>6</sub>) Spectra of compound 5h

12022116071.365.fid  
20231218-1-2

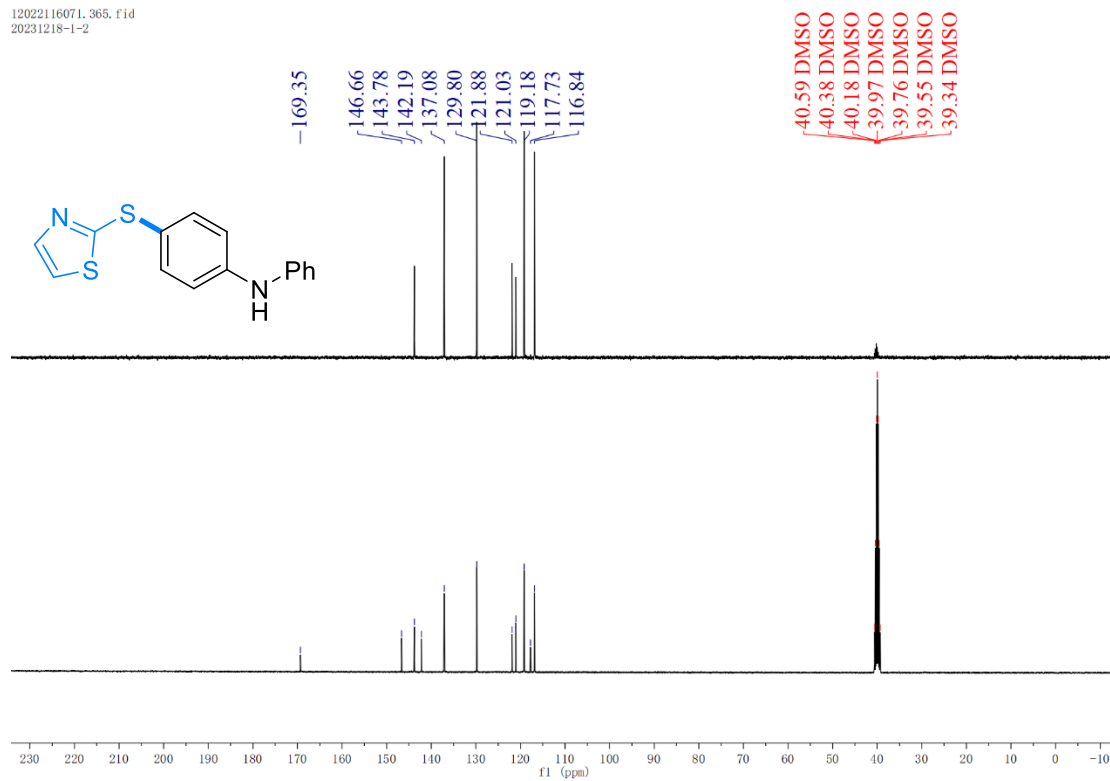

### <sup>13</sup>C-NMR (100 MHz, DMSO-*d*<sub>6</sub>) Spectra of compound 5h

12022116071.370.fid  
20231214-1

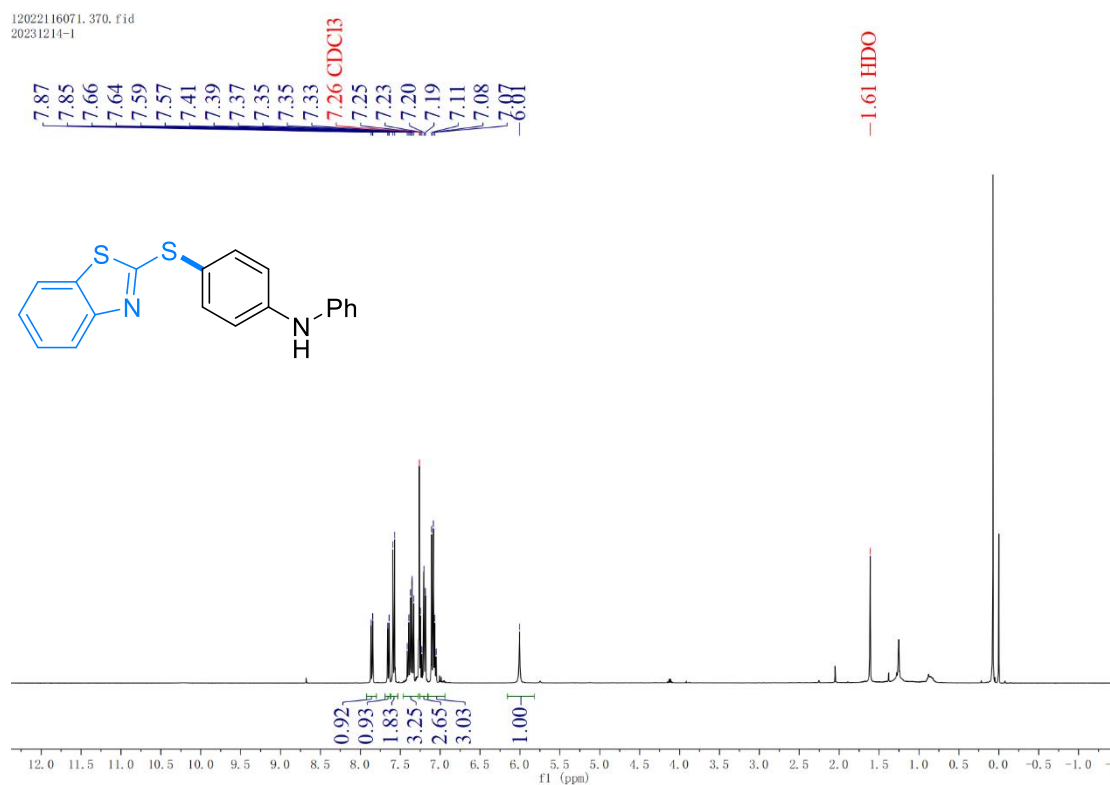

### <sup>1</sup>H-NMR (400 MHz, CDCl<sub>3</sub>) Spectra of compound 5i

12022116071.371.fid  
20231214-1

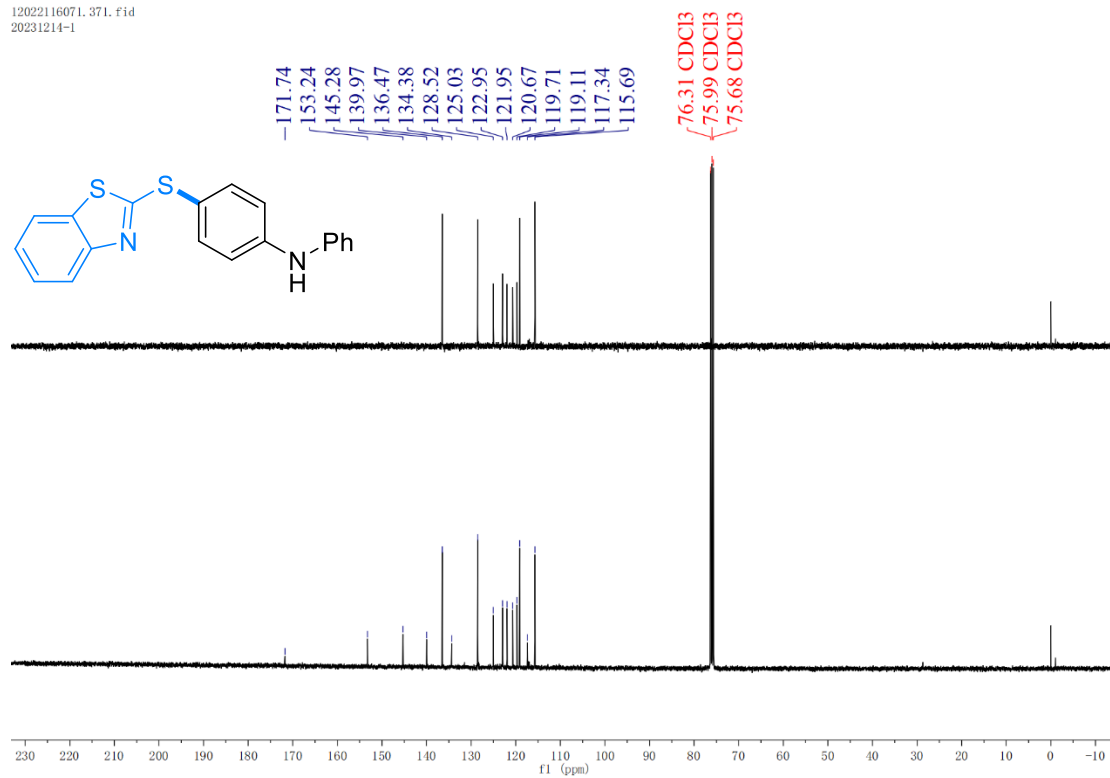

### <sup>13</sup>C-NMR (100 MHz, CDCl<sub>3</sub>) Spectra of compound 5i

12022116071.279.fid  
20231023-1

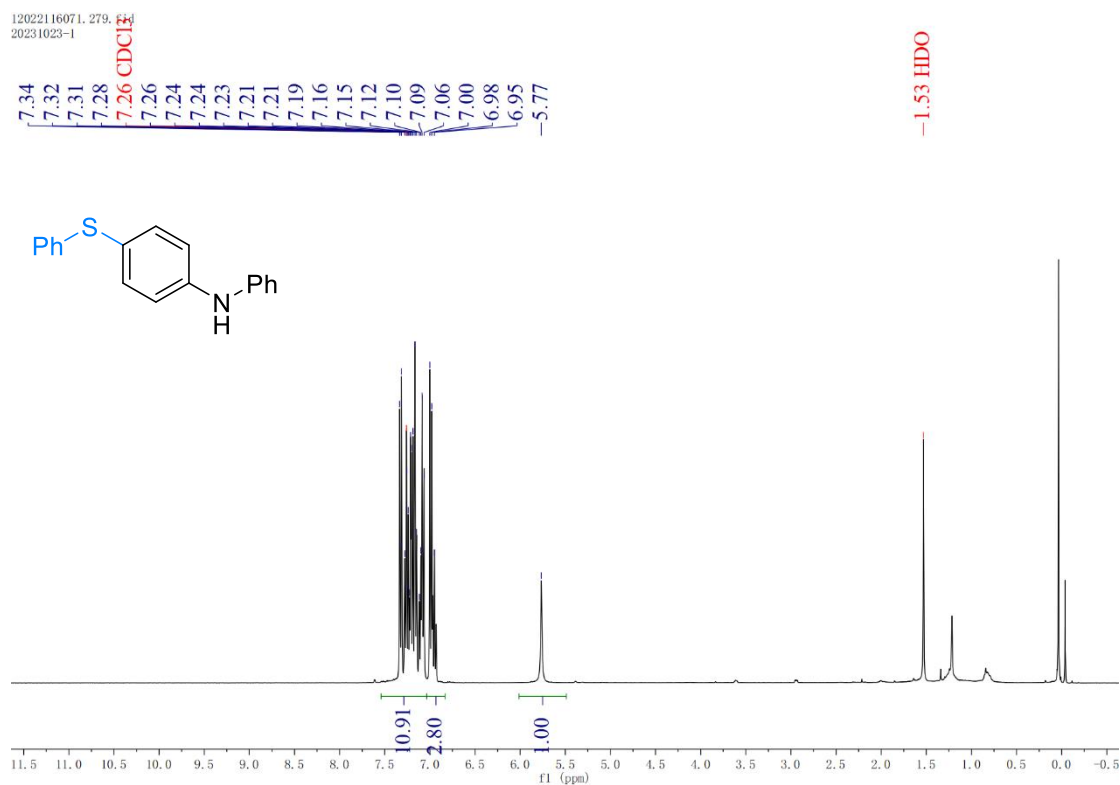

### <sup>1</sup>H-NMR (400 MHz, CDCl<sub>3</sub>) Spectra of compound 6a

12022116071\_280.fid  
20231023-1

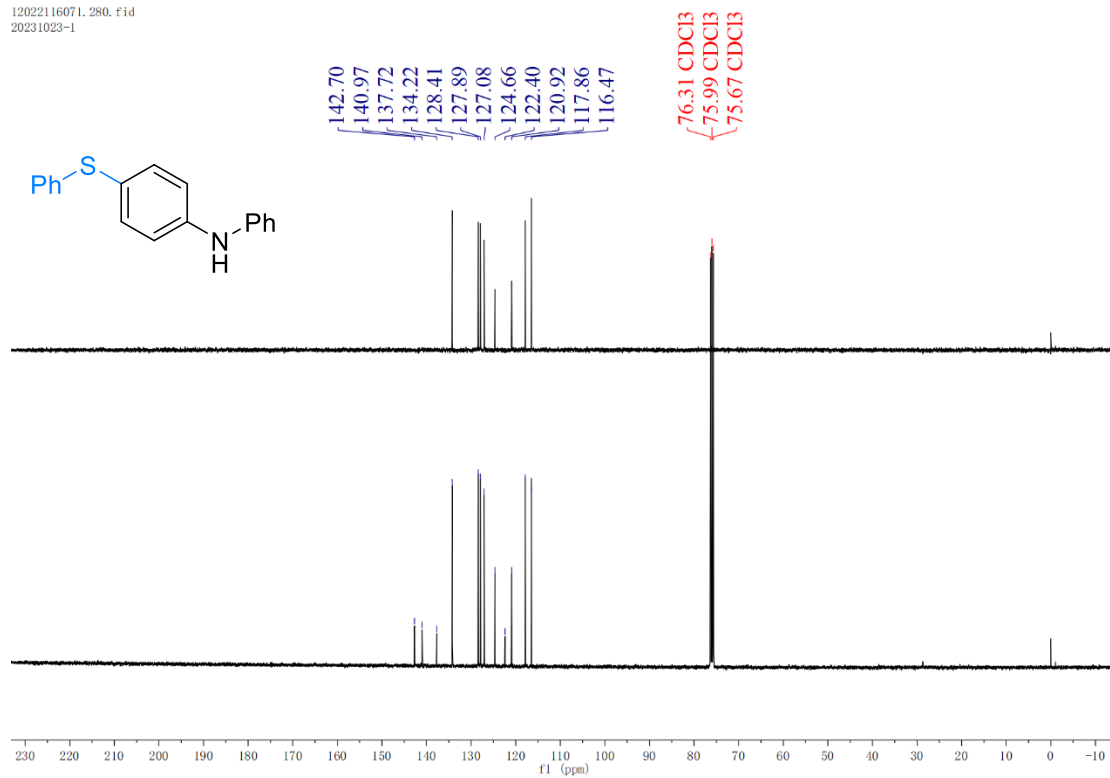

### $^{13}\text{C-NMR}$ (100 MHz, $\text{CDCl}_3$ ) Spectra of compound 6a

12022116071\_281.fid  
20231025-2

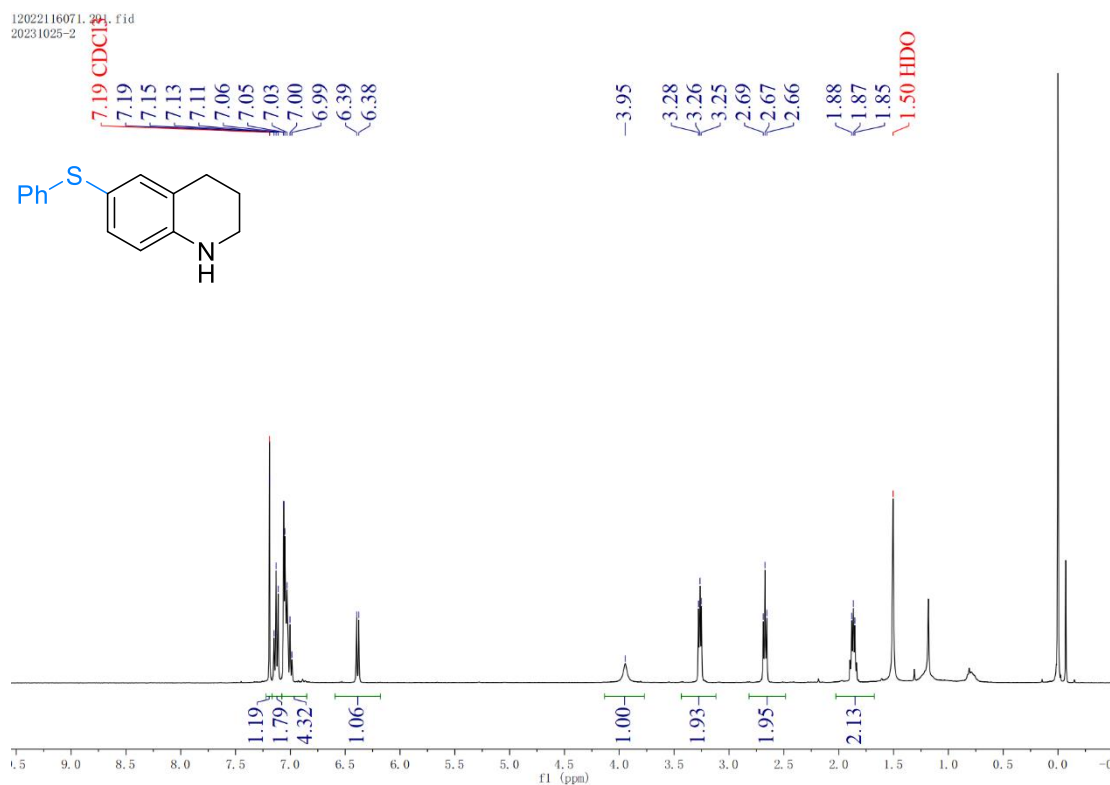

### $^1\text{H-NMR}$ (400 MHz, $\text{CDCl}_3$ ) Spectra of compound 6b

12022116071\_292.fid  
20231025-2

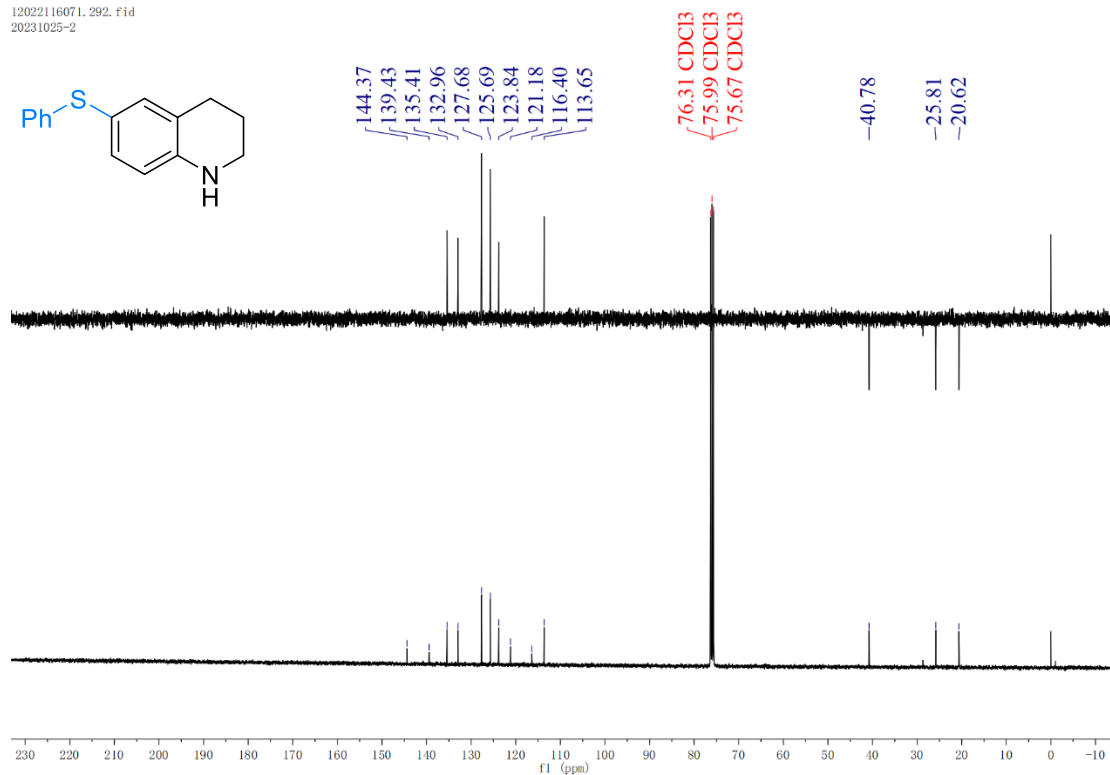

<sup>13</sup>C-NMR (100 MHz, CDCl<sub>3</sub>) Spectra of compound 6b

12022116071\_294.fid  
20231030-1

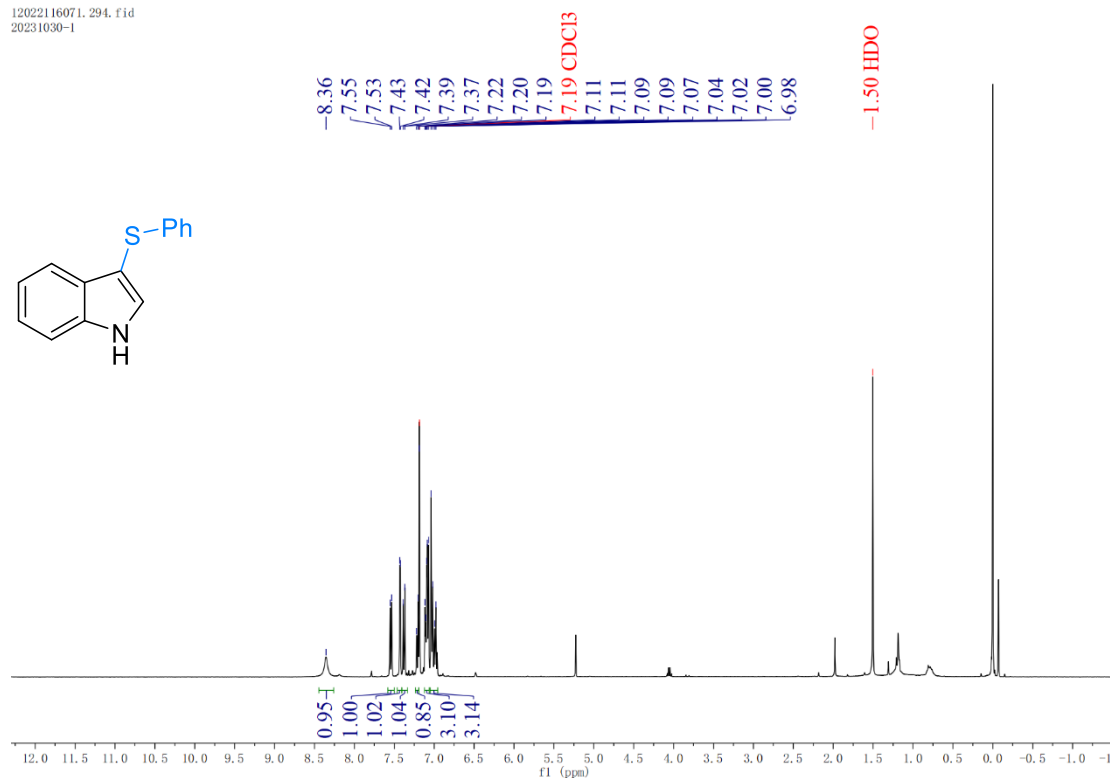

<sup>1</sup>H-NMR (400 MHz, CDCl<sub>3</sub>) Spectra of compound 6c

12022116071.295.fid  
20231030-1

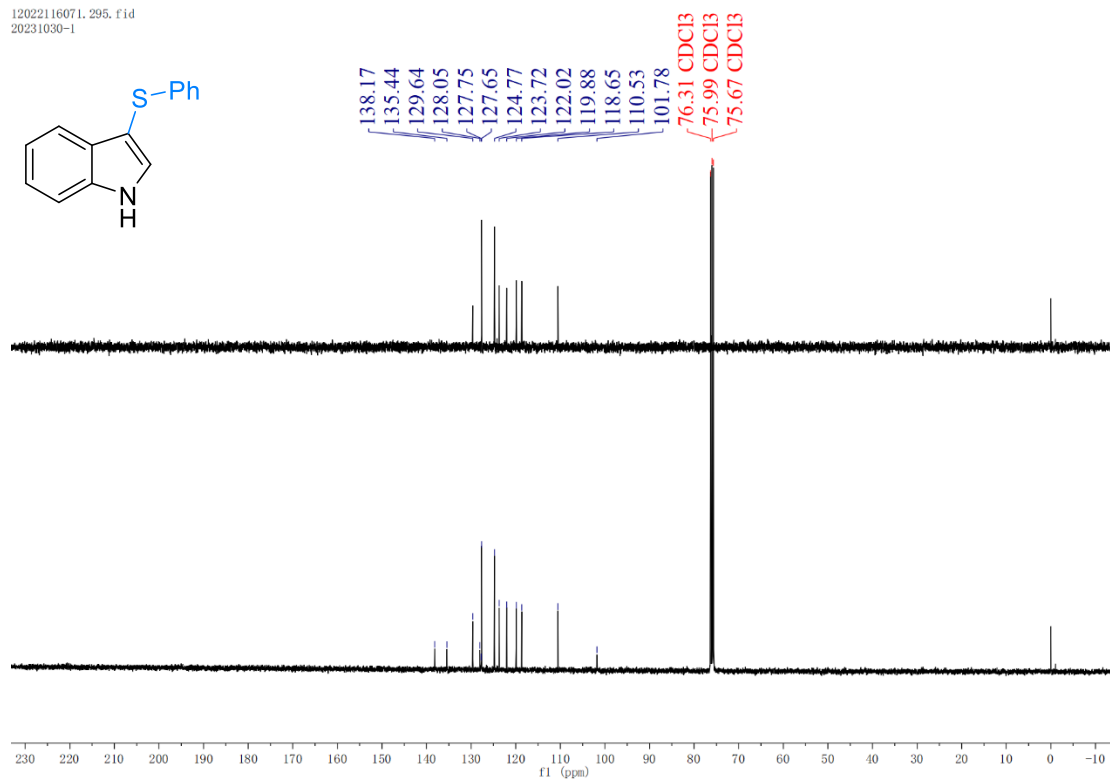

<sup>13</sup>C-NMR (100 MHz, CDCl<sub>3</sub>) Spectra of compound 6c

12022116071.306.fid  
20231101-2

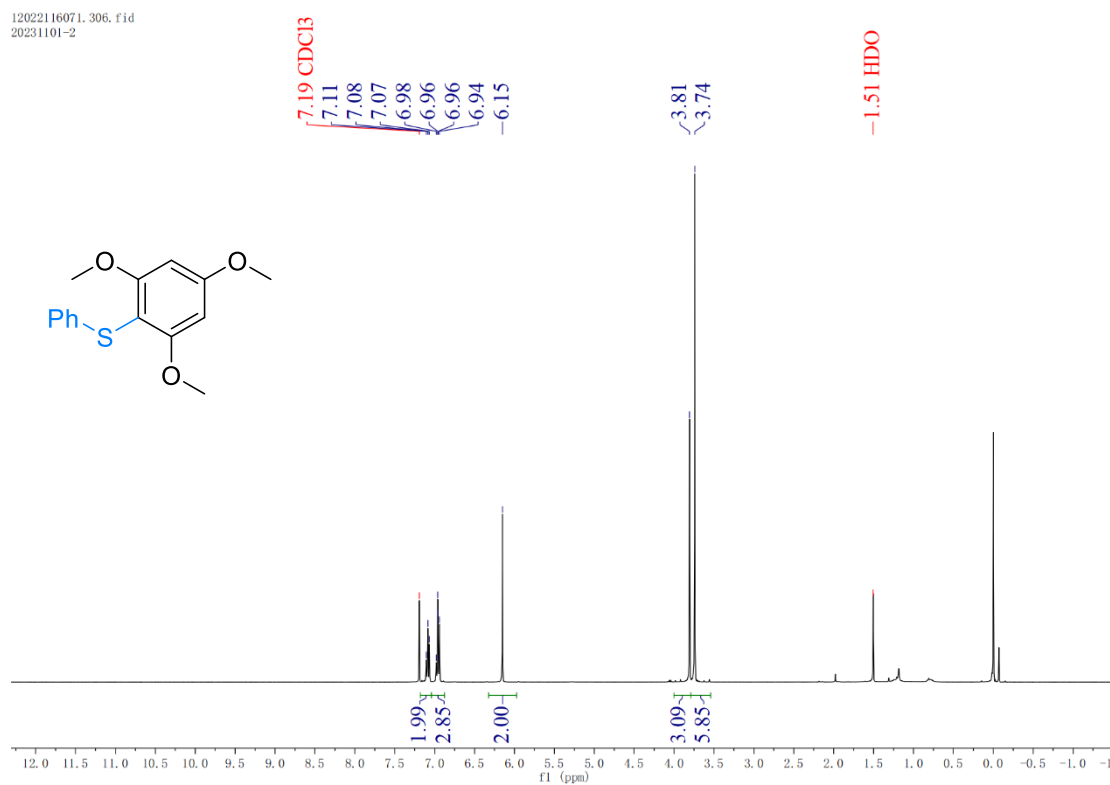

<sup>1</sup>H-NMR (400 MHz, CDCl<sub>3</sub>) Spectra of compound 6d



12022116071.307.fid  
20231101-2

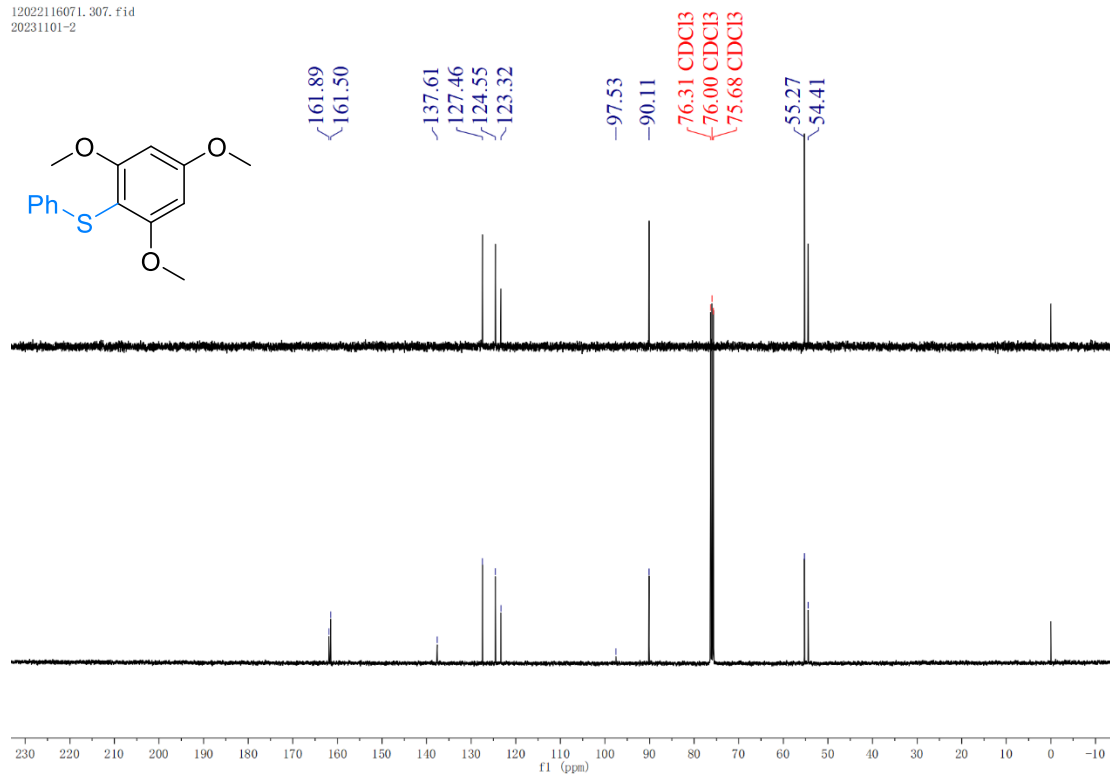

<sup>13</sup>C-NMR (100 MHz, CDCl<sub>3</sub>) Spectra of compound 6d

12022116071.100.fid  
20230718-1

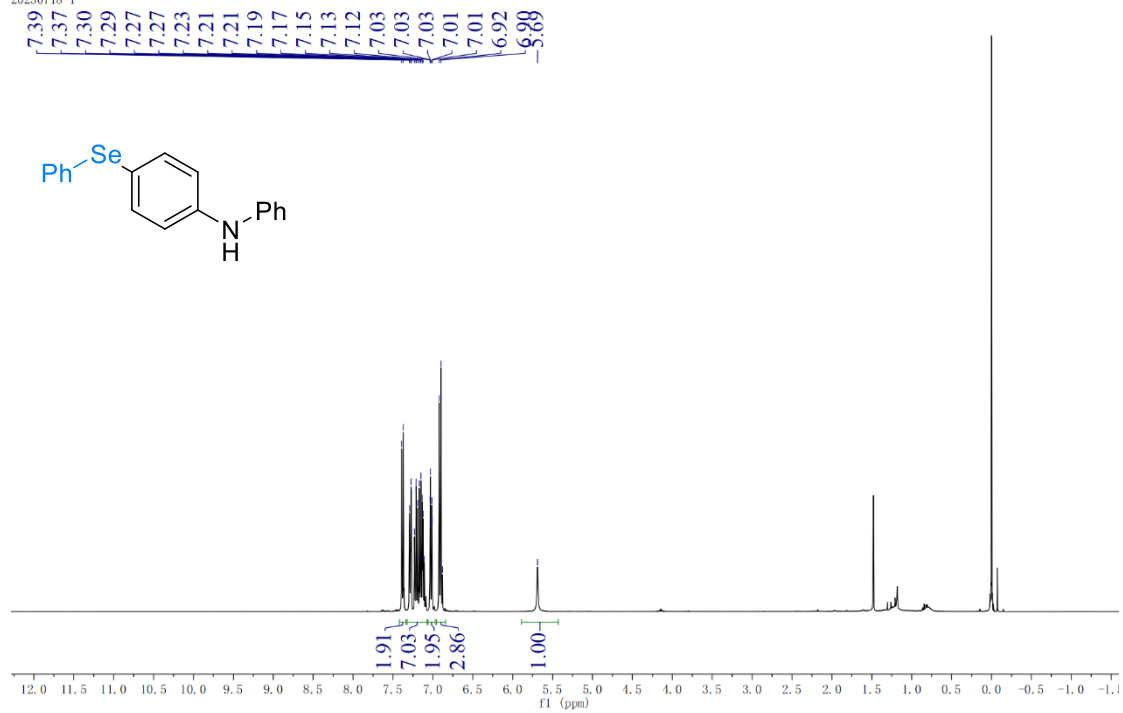

<sup>1</sup>H-NMR (400 MHz, CDCl<sub>3</sub>) Spectra of compound 8a

12022116071.102.fid  
20230718-1

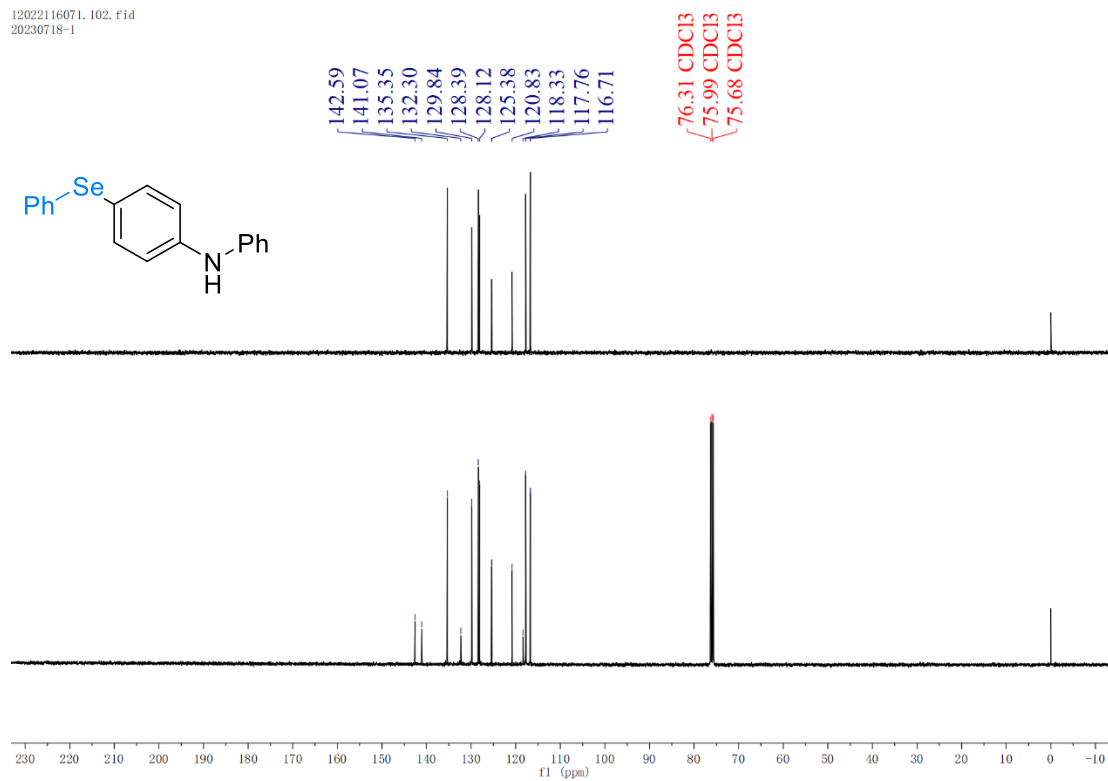

<sup>1</sup>H-NMR (400 MHz, CDCl<sub>3</sub>) Spectra of compound 8a

12022116071.94.fid  
20230610-2

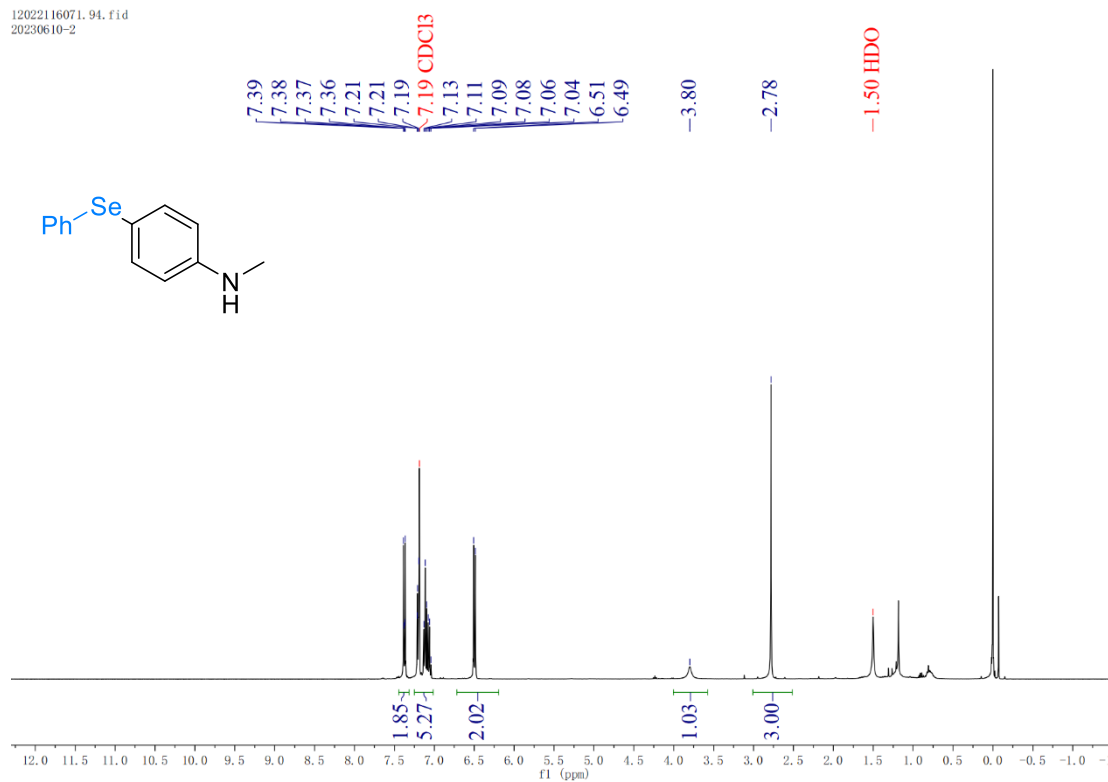

<sup>1</sup>H-NMR (400 MHz, CDCl<sub>3</sub>) Spectra of compound 8b

12022116071.95.fid  
20230610-2

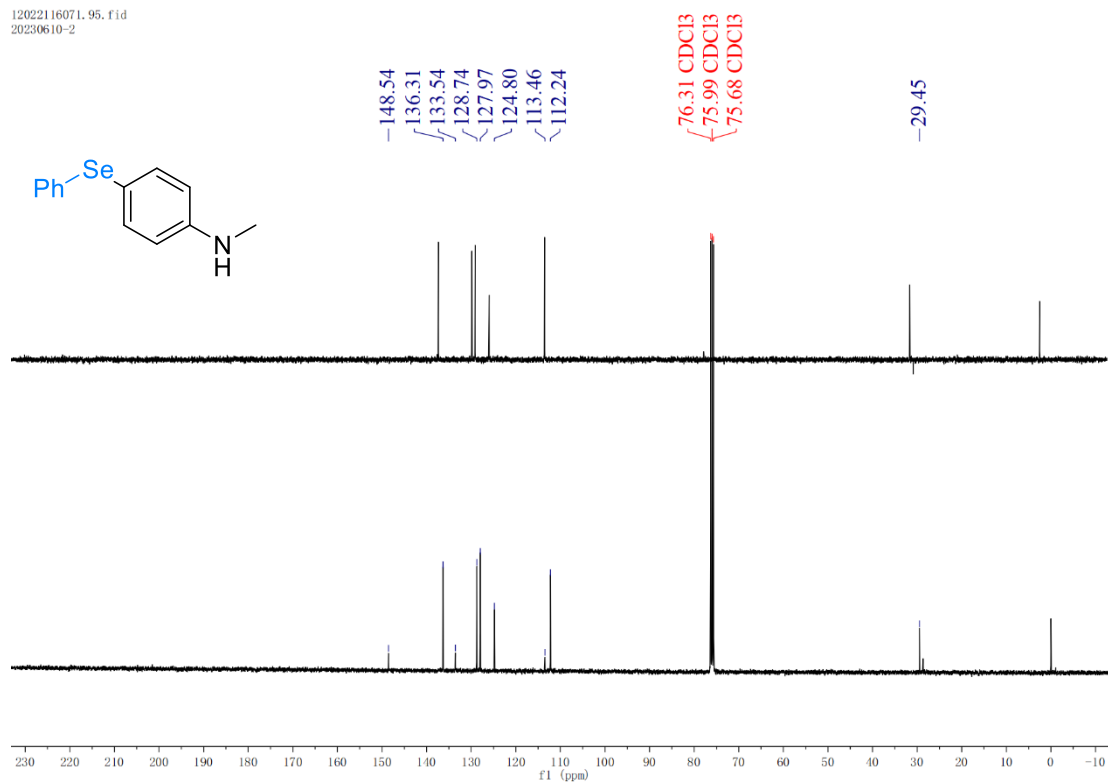

<sup>13</sup>C-NMR (100 MHz, CDCl<sub>3</sub>) Spectra of compound 8b

12022116071.106.fid  
20230723-2

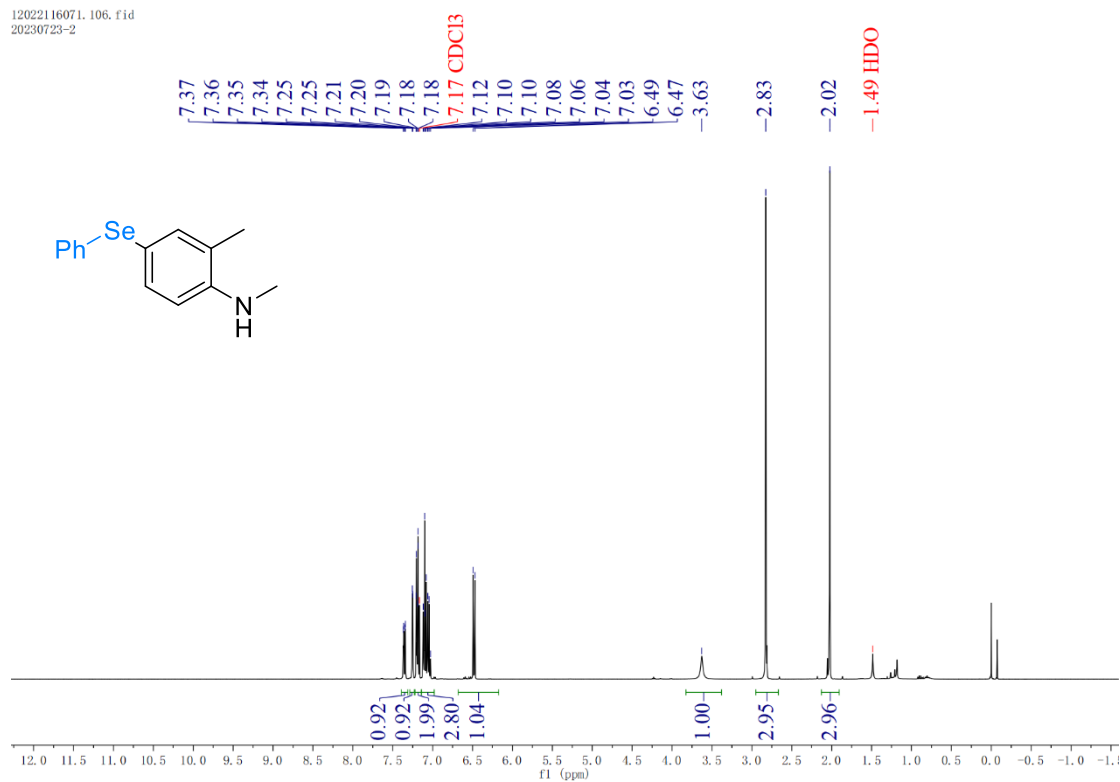

<sup>1</sup>H-NMR (400 MHz, CDCl<sub>3</sub>) Spectra of compound 8c

12022116071.107.fid  
20230723-2

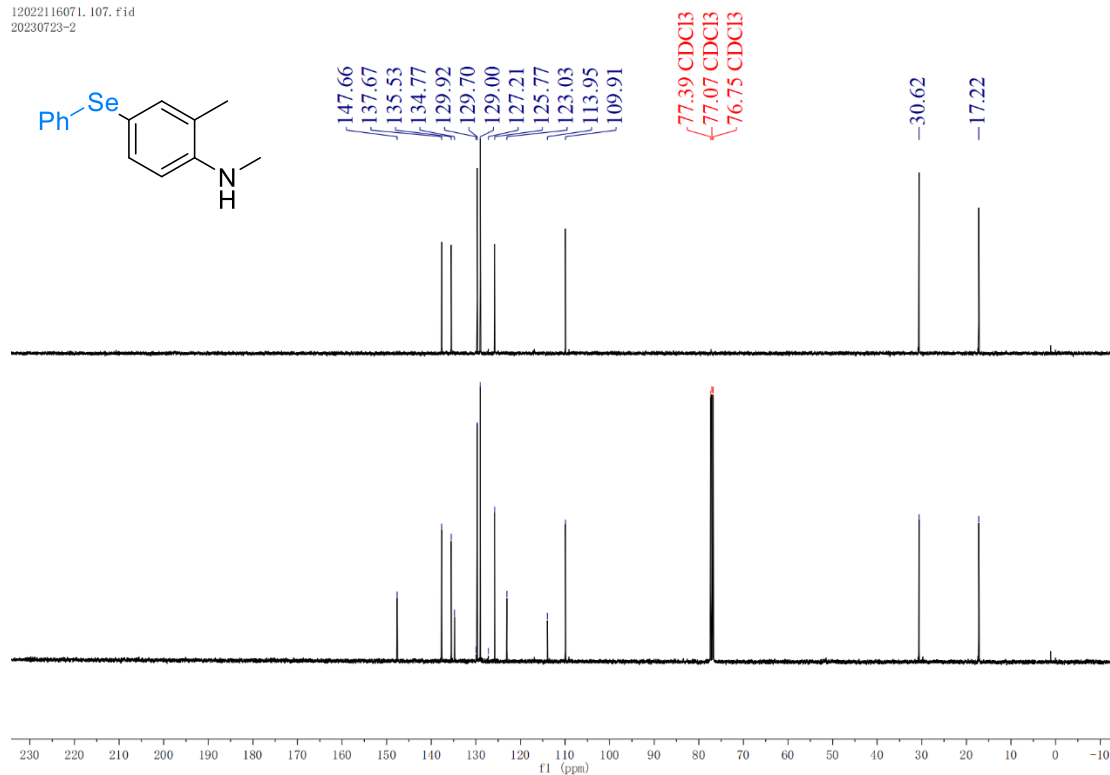

### <sup>13</sup>C-NMR (100 MHz, CDCl<sub>3</sub>) Spectra of compound 8c

12022116071.273.fid  
20231024-3

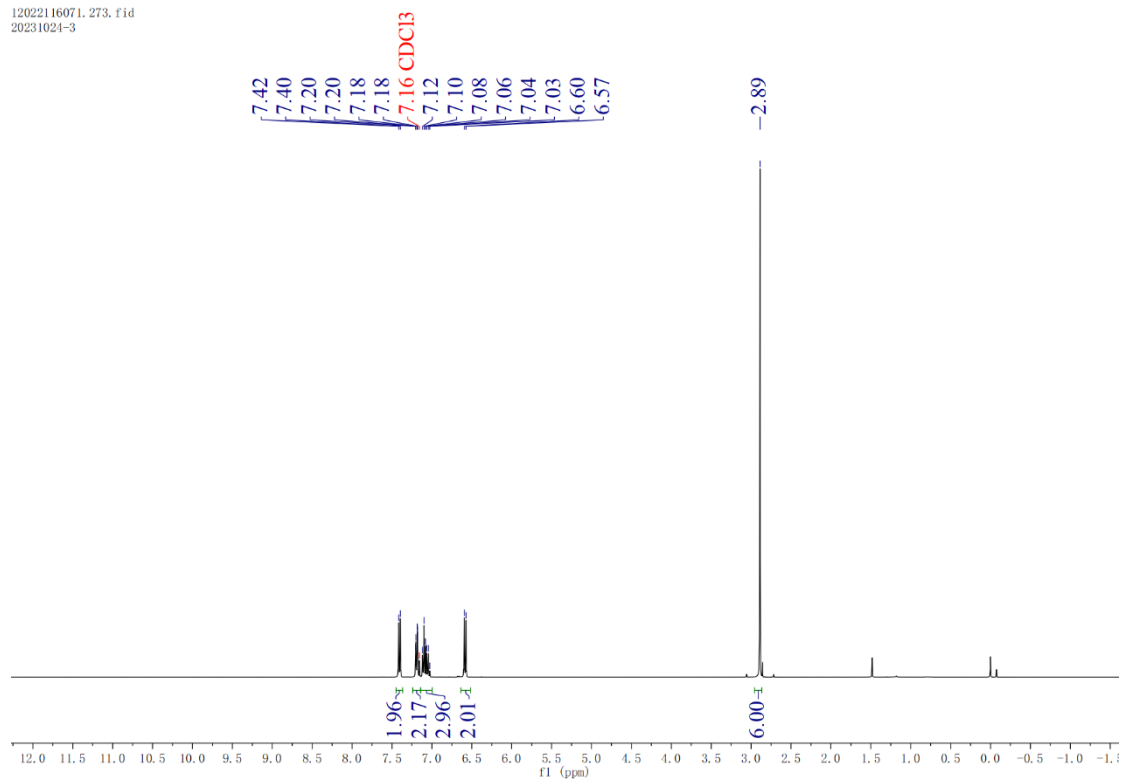

### <sup>1</sup>H-NMR (400 MHz, CDCl<sub>3</sub>) Spectra of compound 8d

12022116071.274.fid  
20231024-3

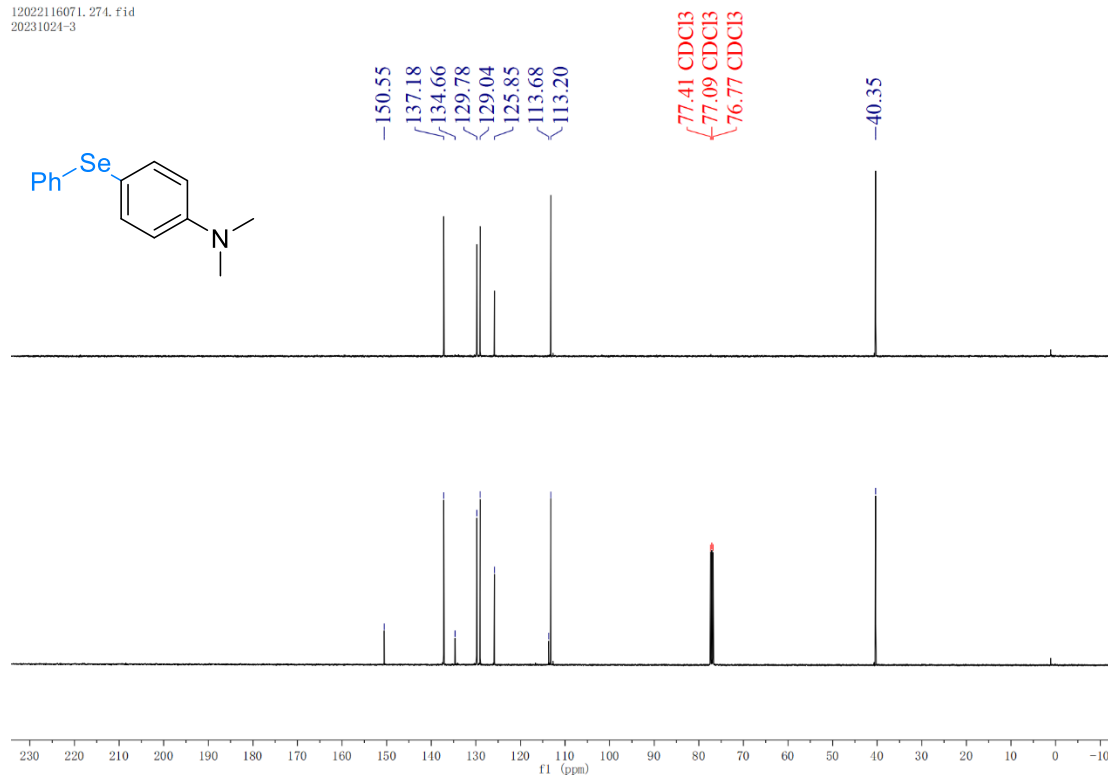

<sup>13</sup>C-NMR (100 MHz, CDCl<sub>3</sub>) Spectra of compound 8d

12022116071.180.fid  
20230726-2

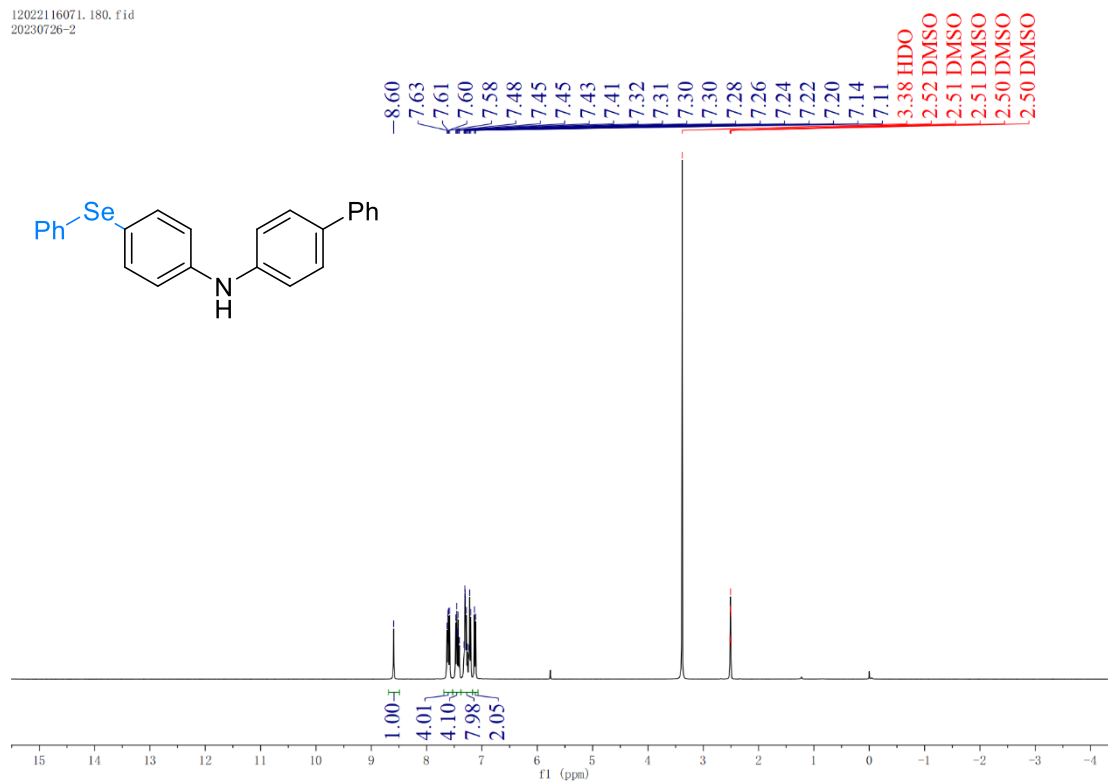

<sup>1</sup>H-NMR (400 MHz, DMSO) Spectra of compound 8e

12022116071.122.fid  
20230726-2

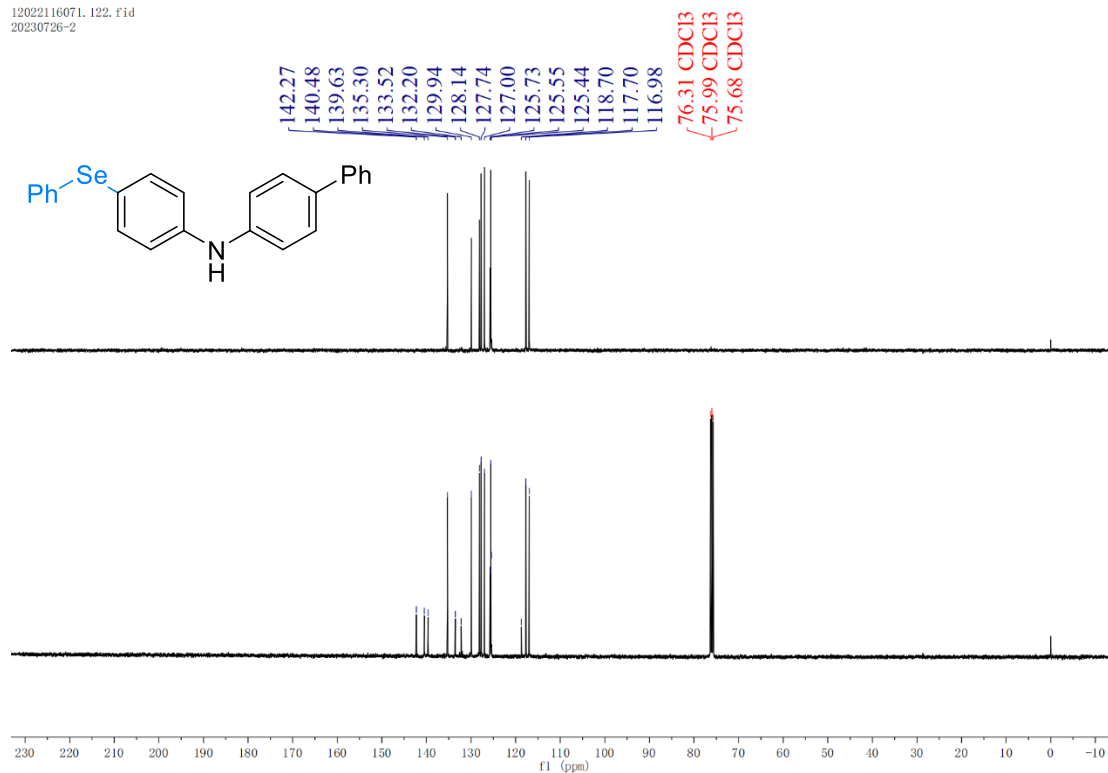

<sup>13</sup>C-NMR (100 MHz, CDCl<sub>3</sub>) Spectra of compound 8e

12022116071.264.fid  
20231018-2

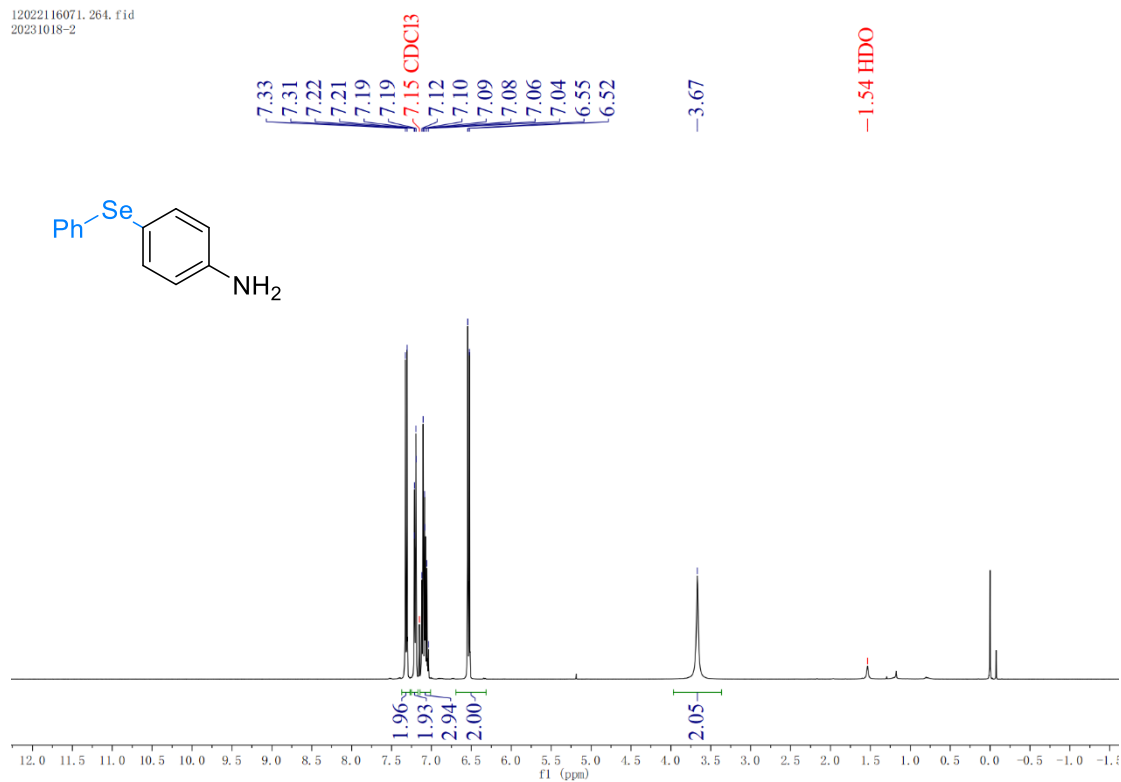

<sup>1</sup>H-NMR (400 MHz, CDCl<sub>3</sub>) Spectra of compound 8f

12022116071.265.fid  
20231018-2

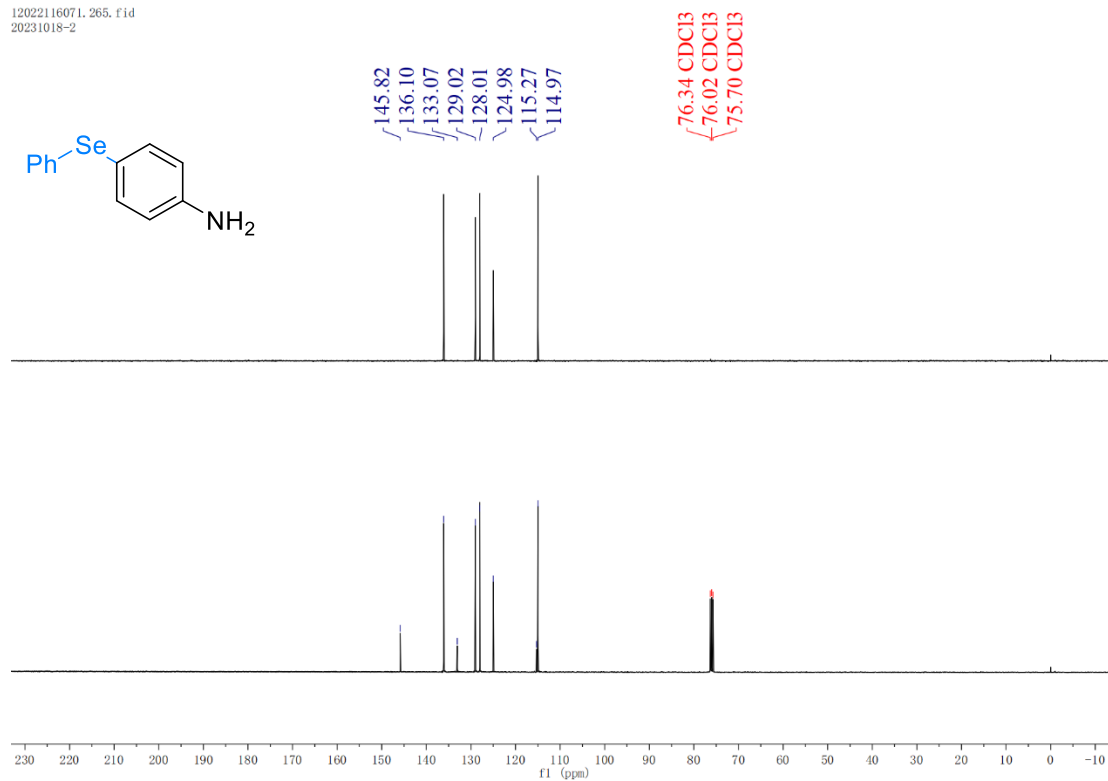

### <sup>13</sup>C-NMR (100 MHz, CDCl<sub>3</sub>) Spectra of compound 8f

12022116071.400.fid  
20240111-9

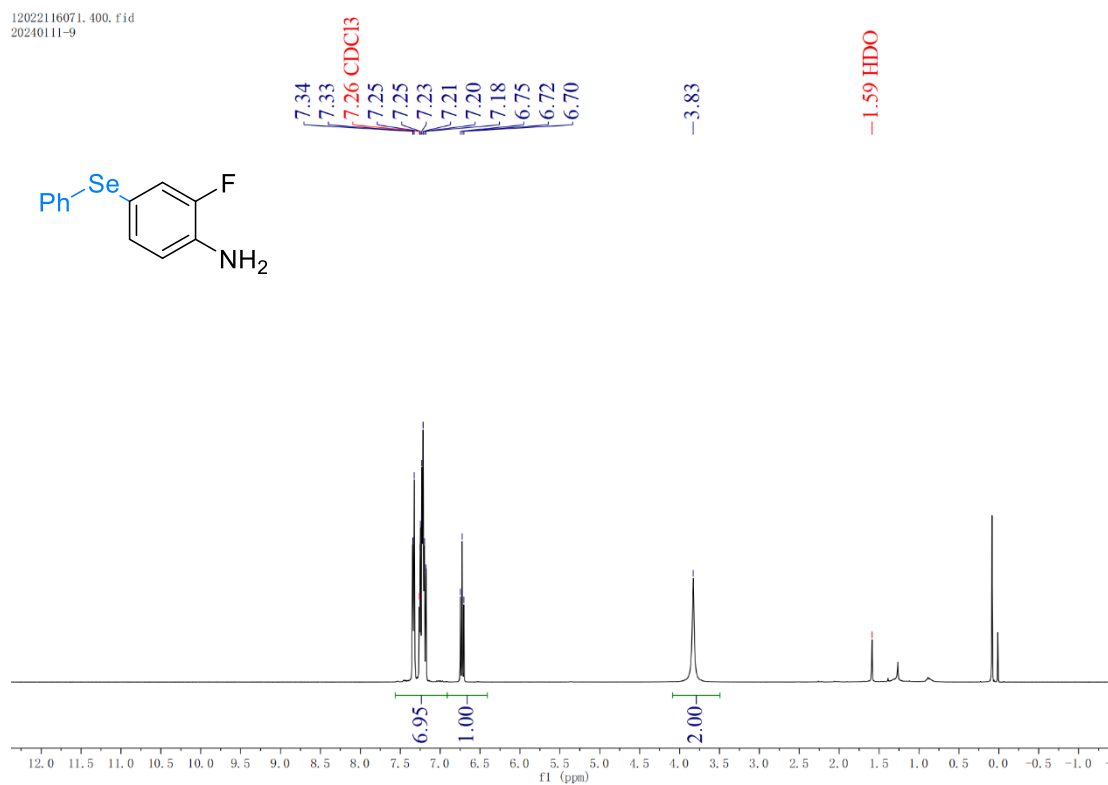

### <sup>1</sup>H-NMR (400 MHz, CDCl<sub>3</sub>) Spectra of compound 8g

12022116071.401.fid  
20240111-9

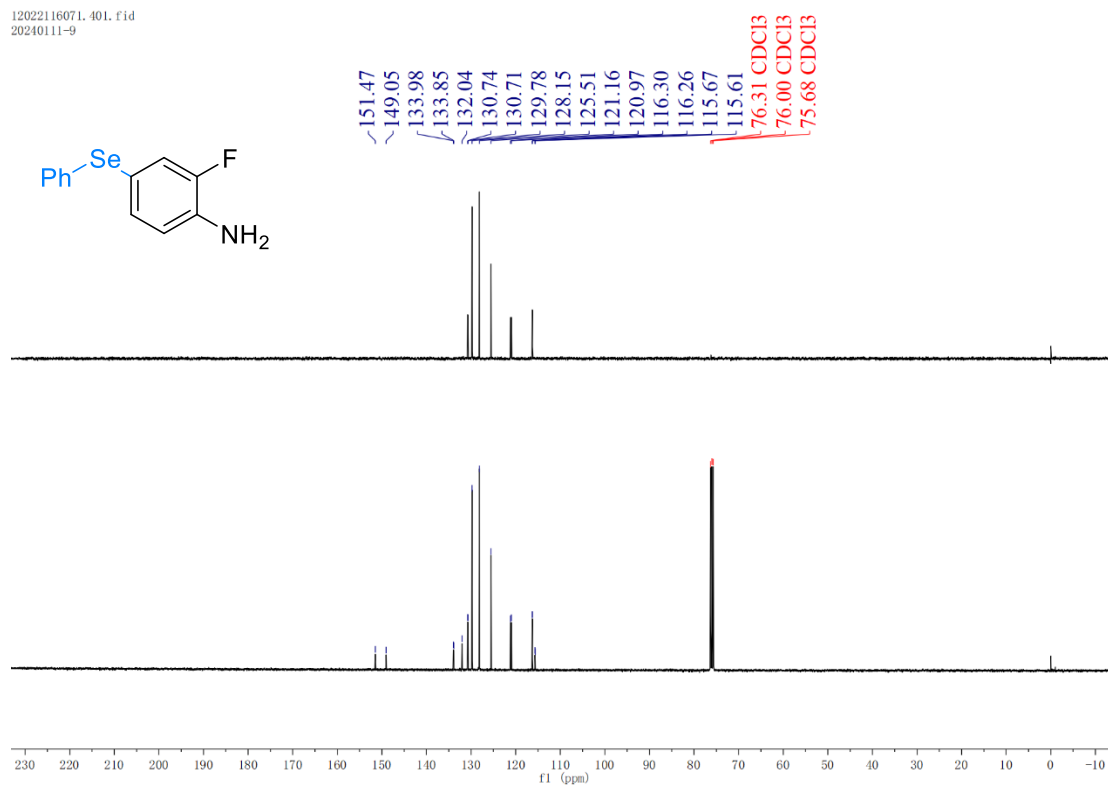

12022116071.403.fid  
20240111-9

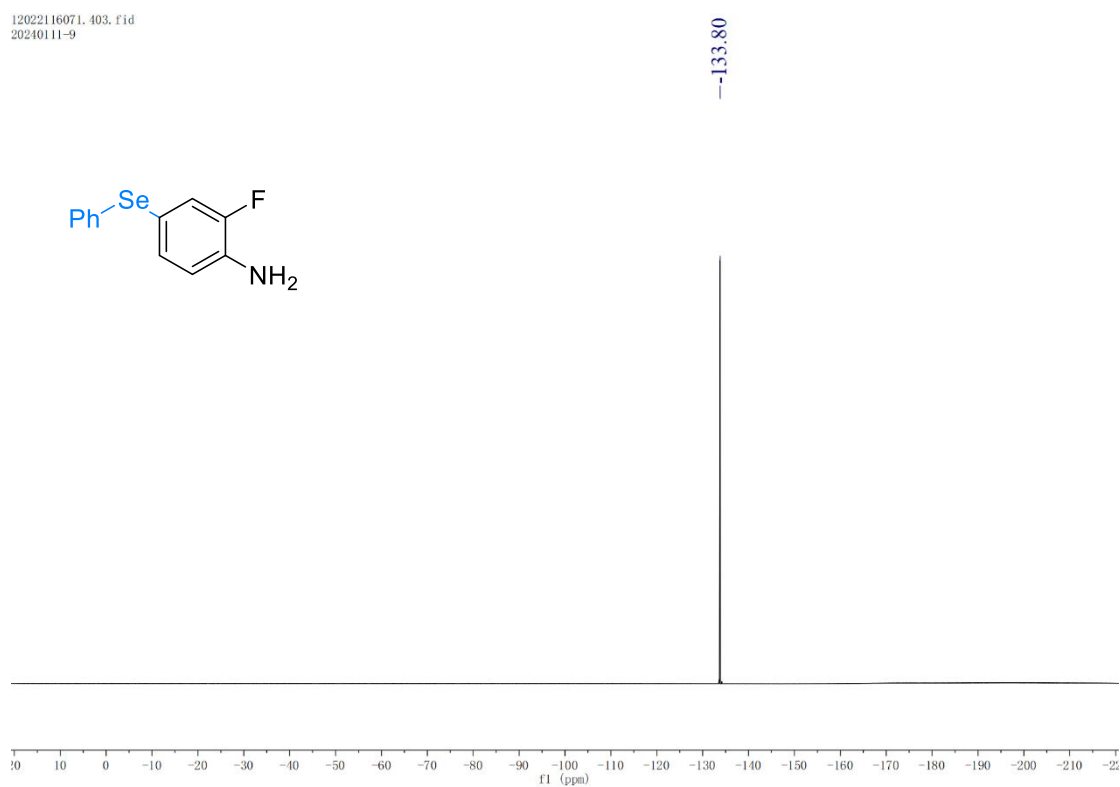



12022116071.133.fid  
20230730-2

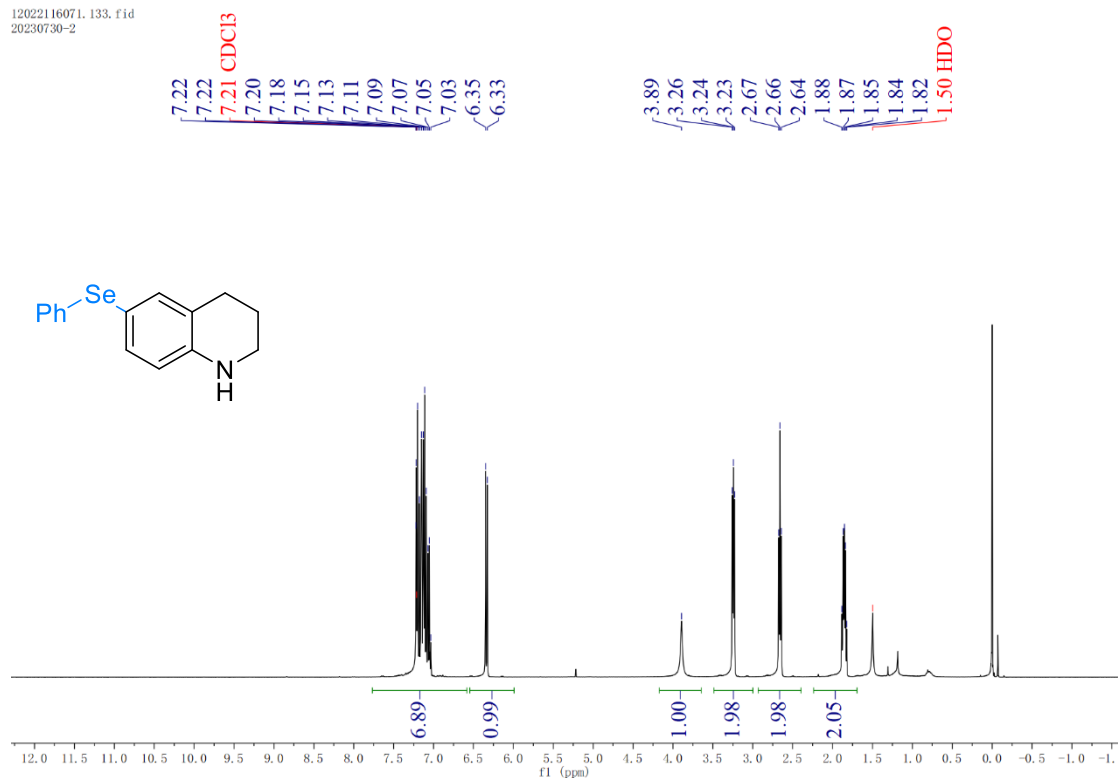

**<sup>1</sup>H-NMR (400 MHz, CDCl<sub>3</sub>) Spectra of compound 8h**

12022116071.134.fid  
20230730-2

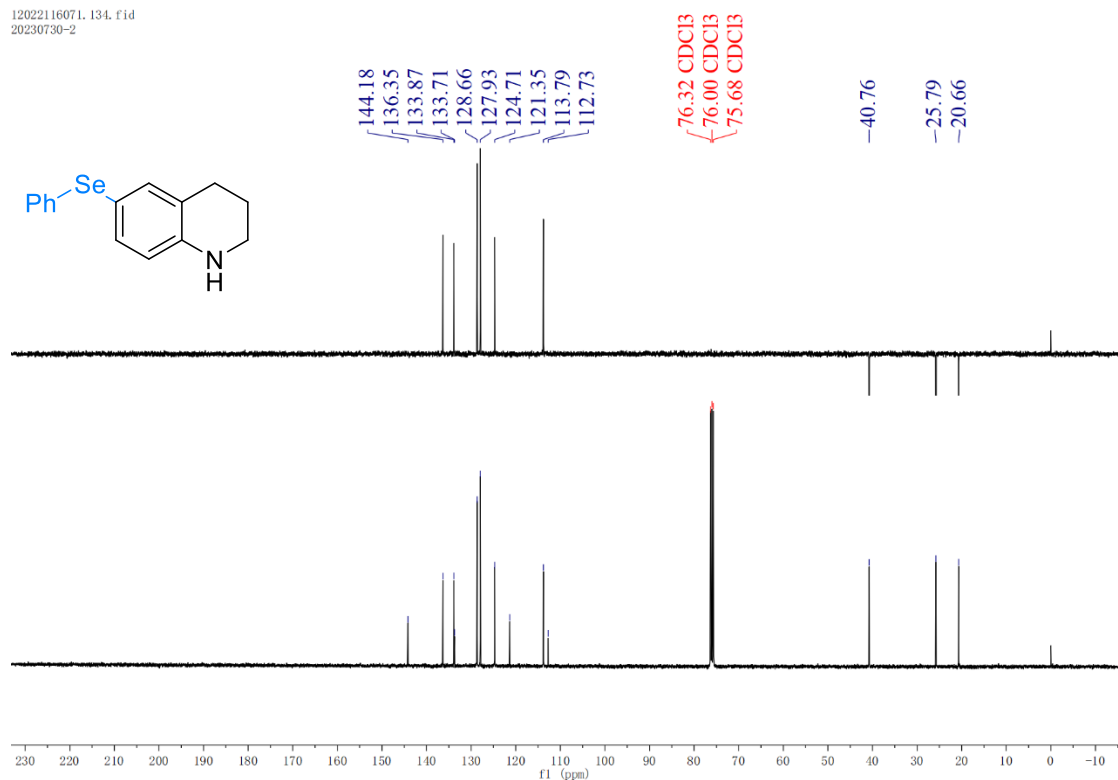

**<sup>13</sup>C-NMR (100 MHz, CDCl<sub>3</sub>) Spectra of compound 8h**

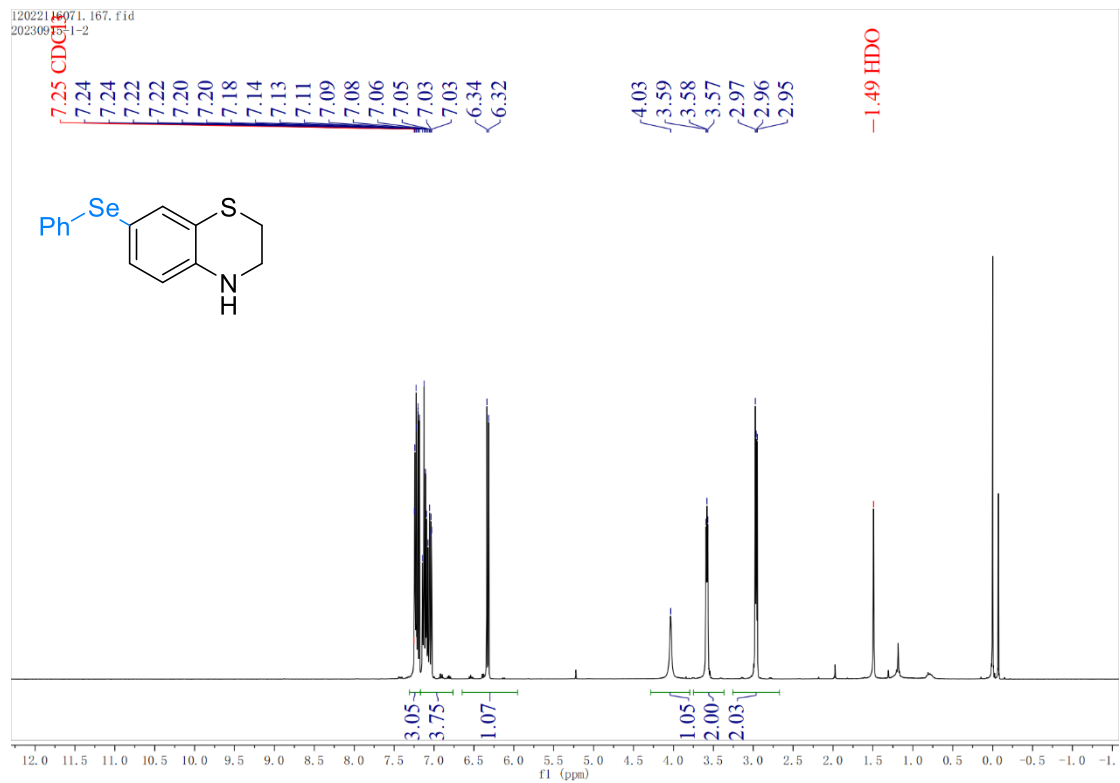

**$^1\text{H-NMR}$  (400 MHz,  $\text{CDCl}_3$ ) Spectra of compound 8i**

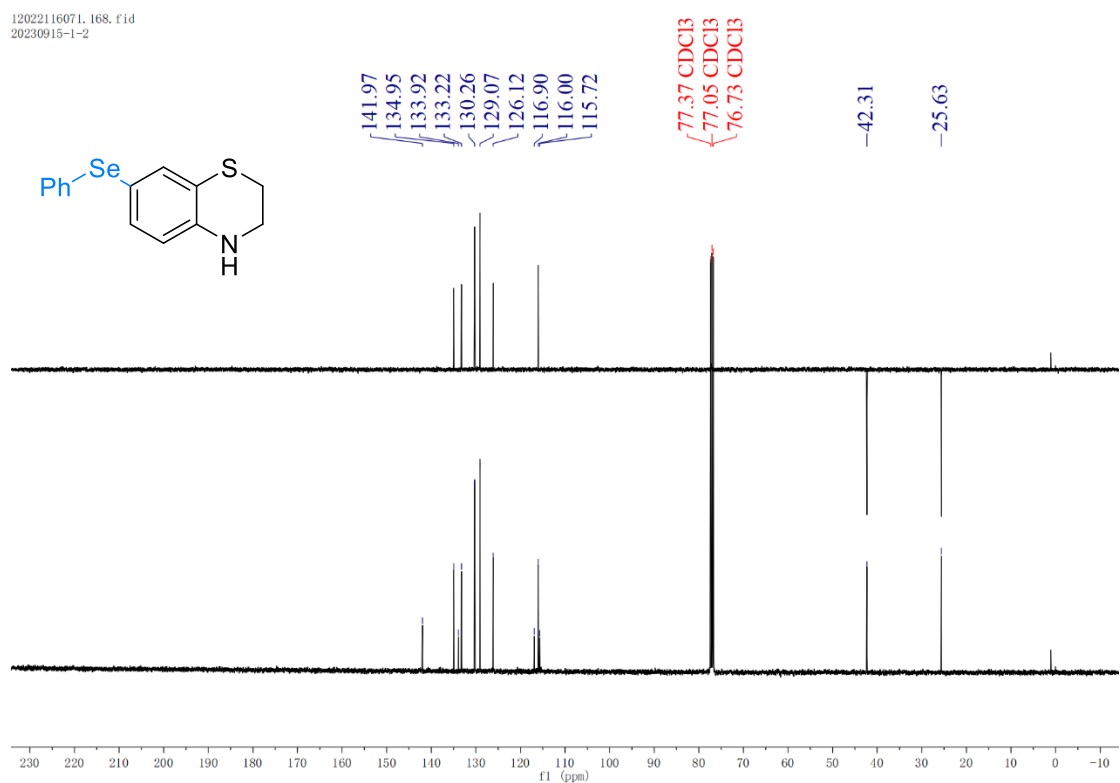

**$^{13}\text{C-NMR}$  (100 MHz,  $\text{CDCl}_3$ ) Spectra of compound 8i**

12022116071.318.fid  
20230919-1

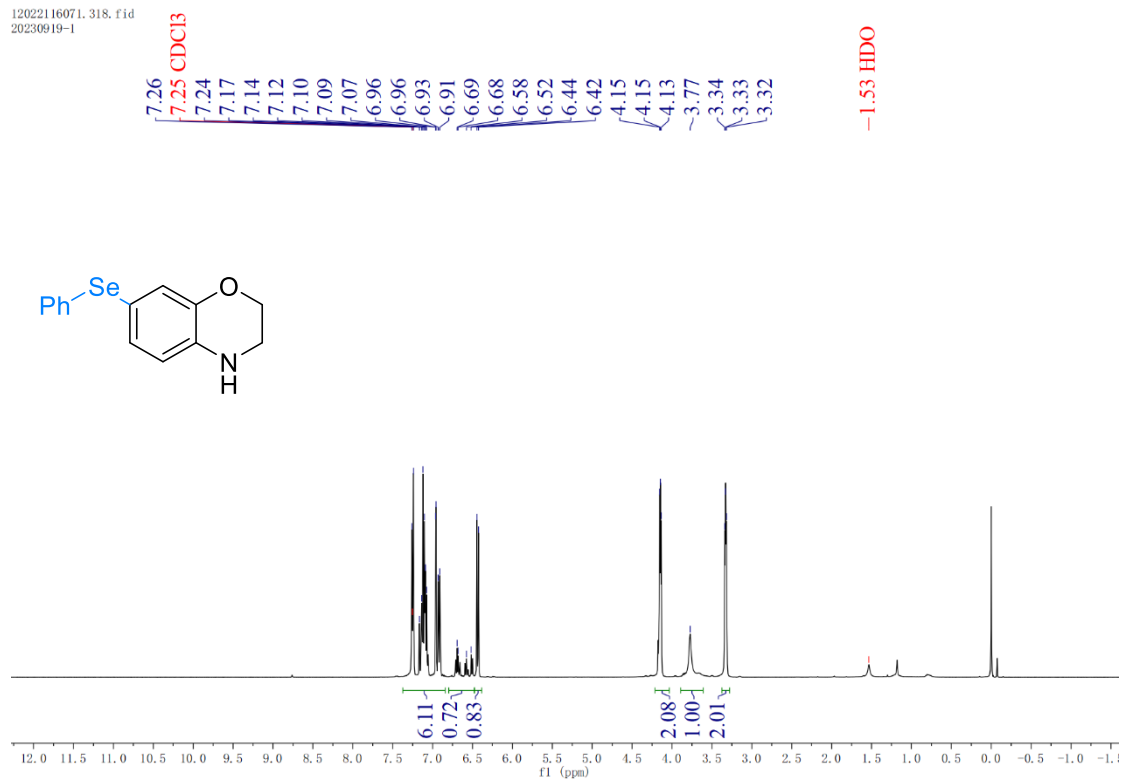

### <sup>1</sup>H-NMR (400 MHz, CDCl<sub>3</sub>) Spectra of compound 8j

12022116071.319.fid  
20230919-1

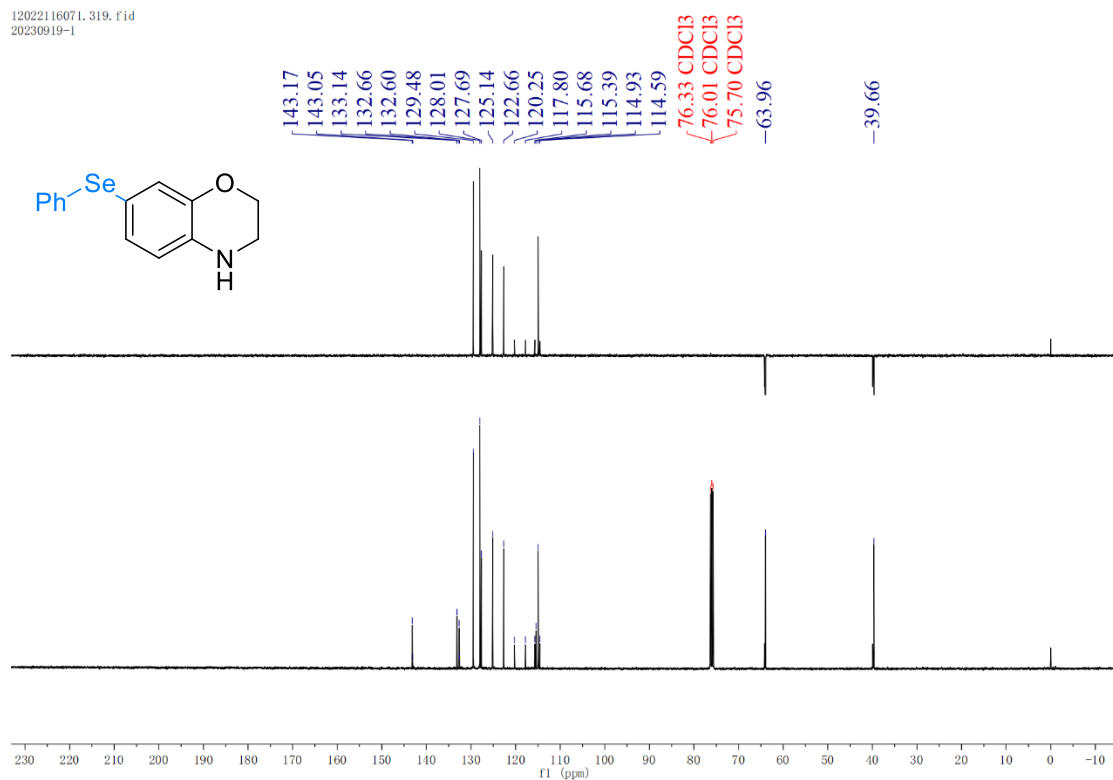

### <sup>13</sup>C-NMR (100 MHz, CDCl<sub>3</sub>) Spectra of compound 8j

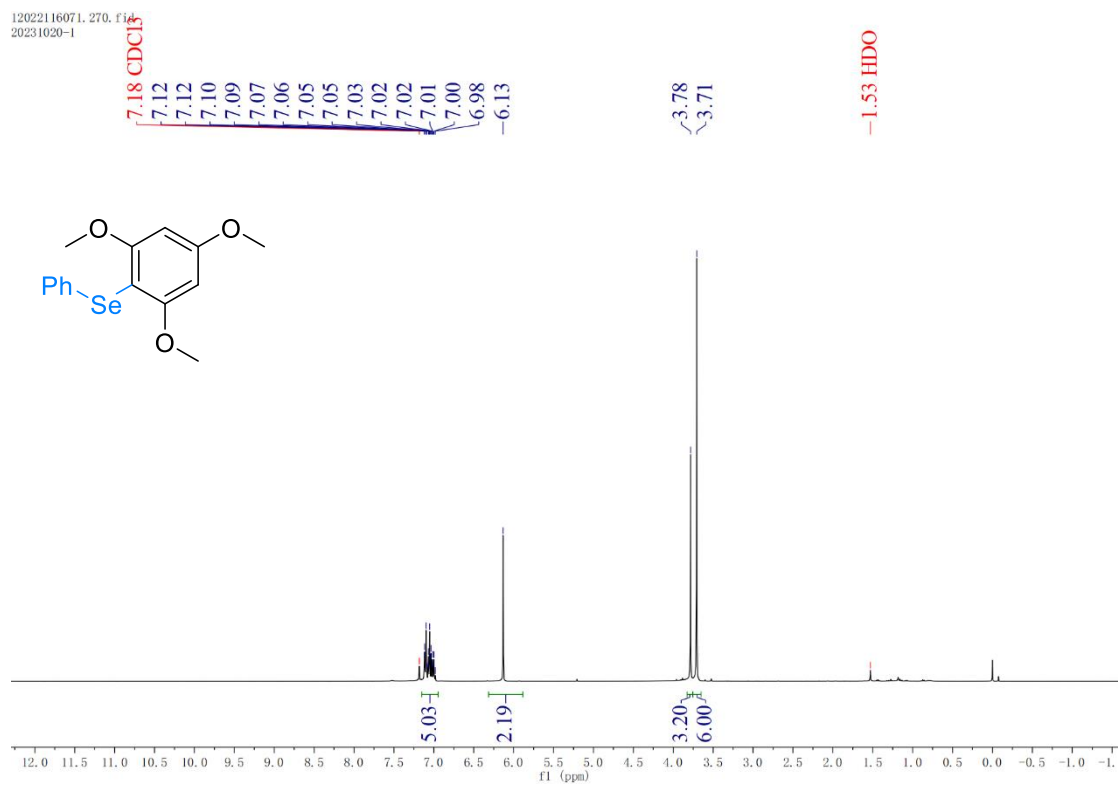

**<sup>1</sup>H-NMR (400 MHz, CDCl<sub>3</sub>) Spectra of compound 8k**

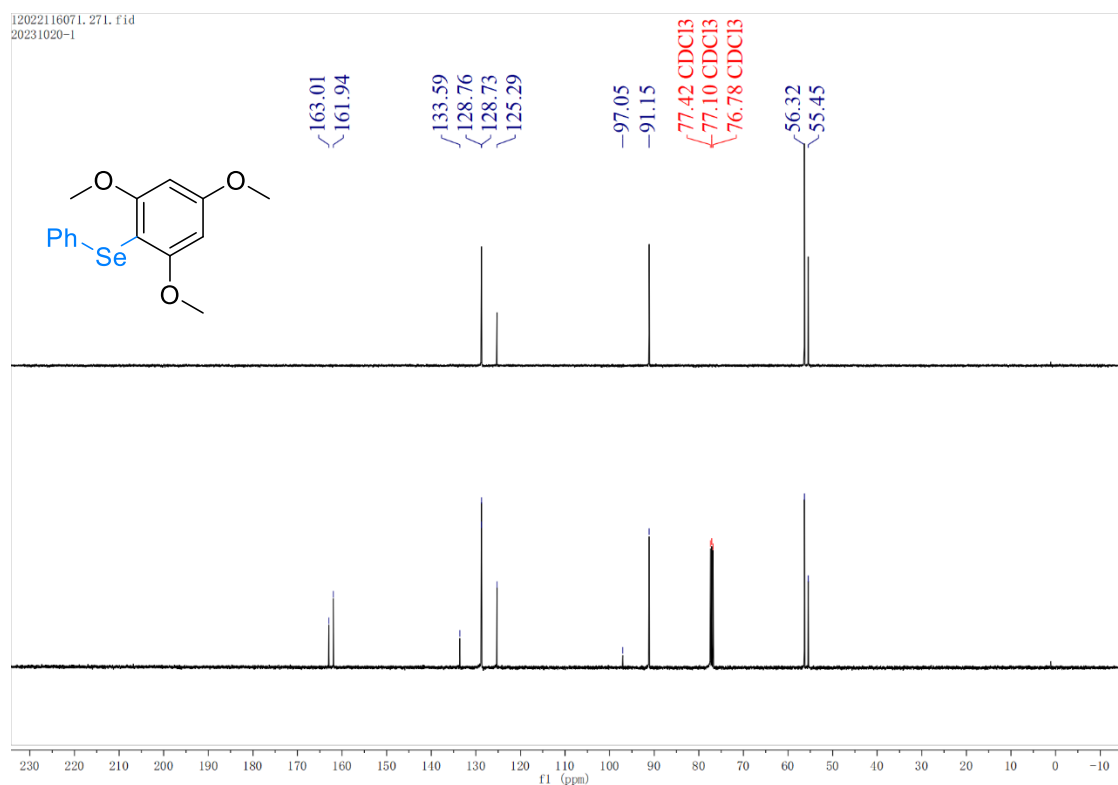

**<sup>13</sup>C-NMR (100 MHz, CDCl<sub>3</sub>) Spectra of compound 8k**

12022116071.336.fid  
20231117-1

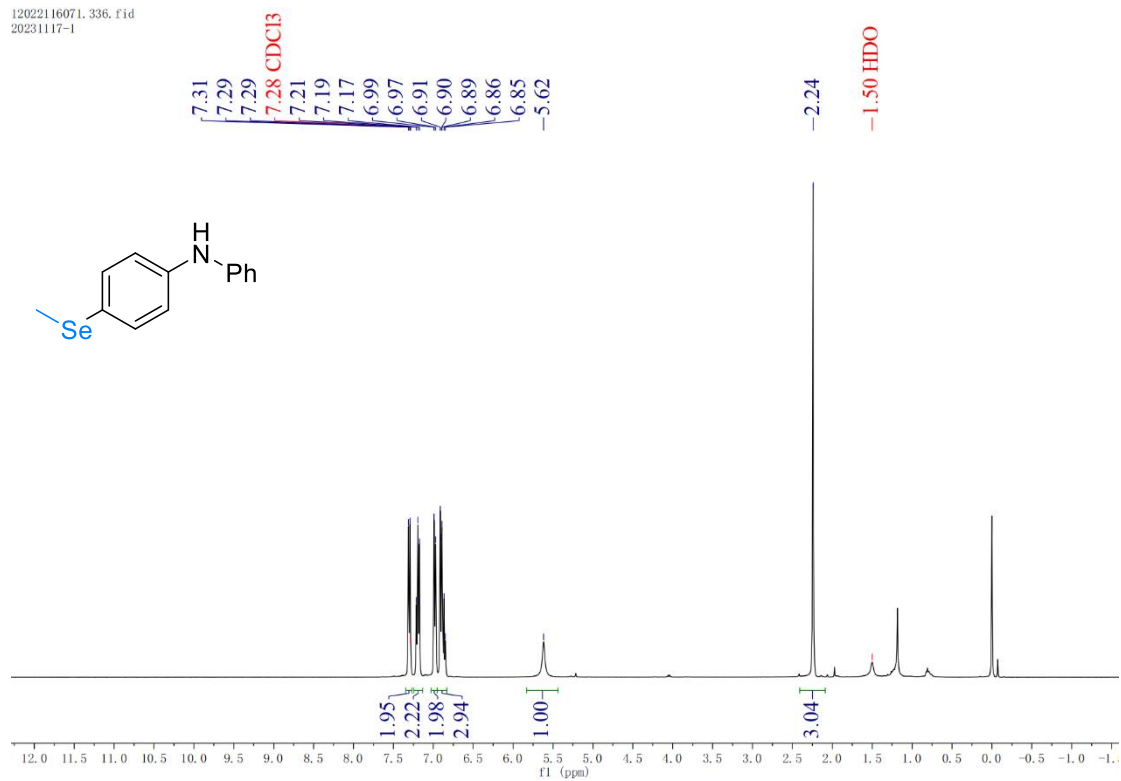

### <sup>1</sup>H-NMR (400 MHz, CDCl<sub>3</sub>) Spectra of compound 8l

12022116071.337.fid  
20231117-1

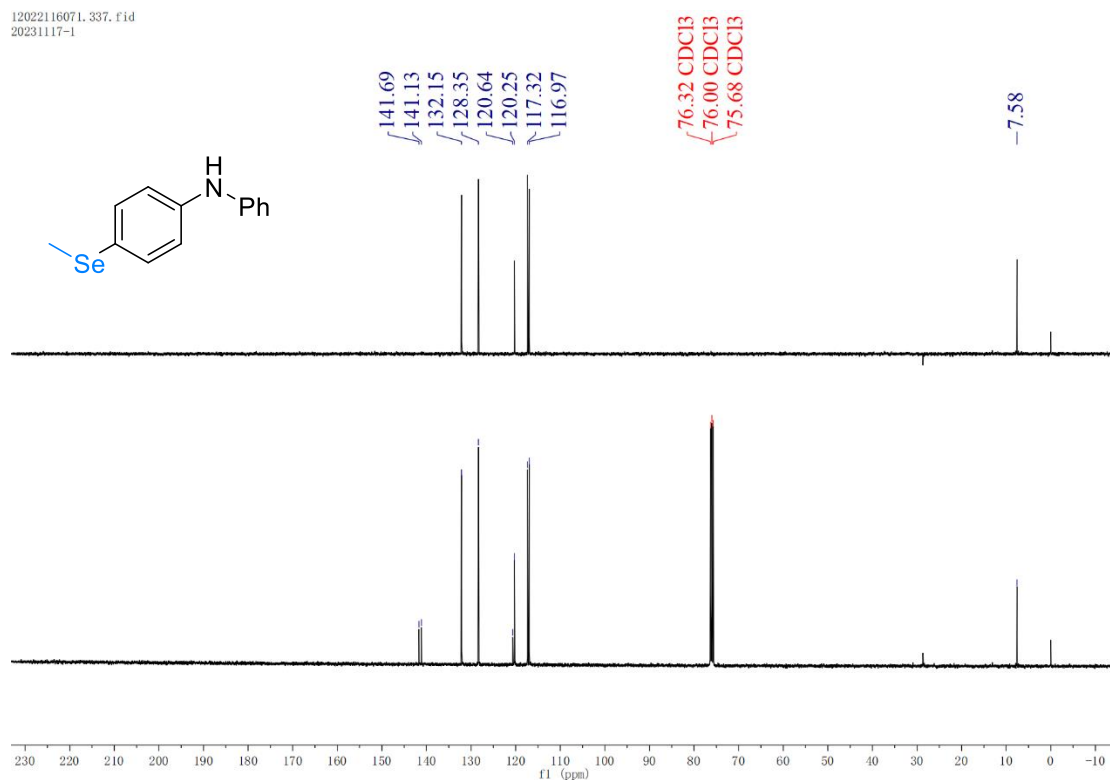

### <sup>13</sup>C-NMR (100 MHz, CDCl<sub>3</sub>) Spectra of compound 8l

12022116071.200.fid  
20230925-3

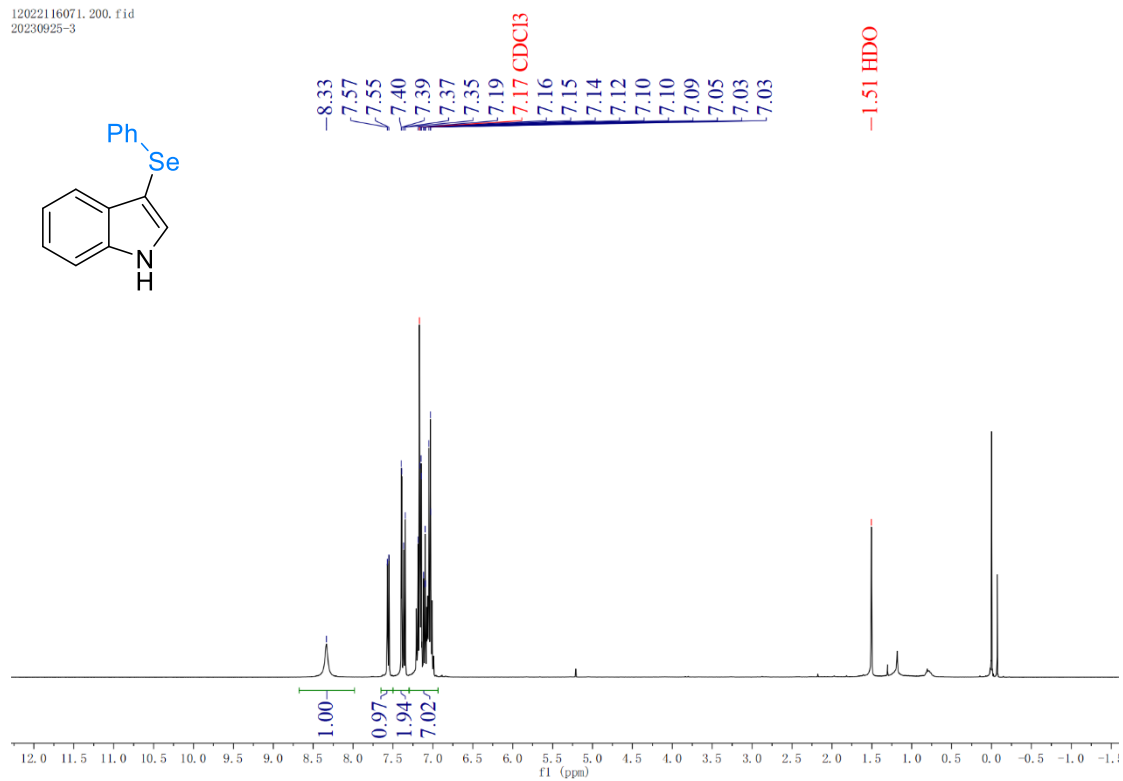

**<sup>1</sup>H-NMR (400 MHz, CDCl<sub>3</sub>) Spectra of compound 9a**

12022116071.201.fid  
20230925-3

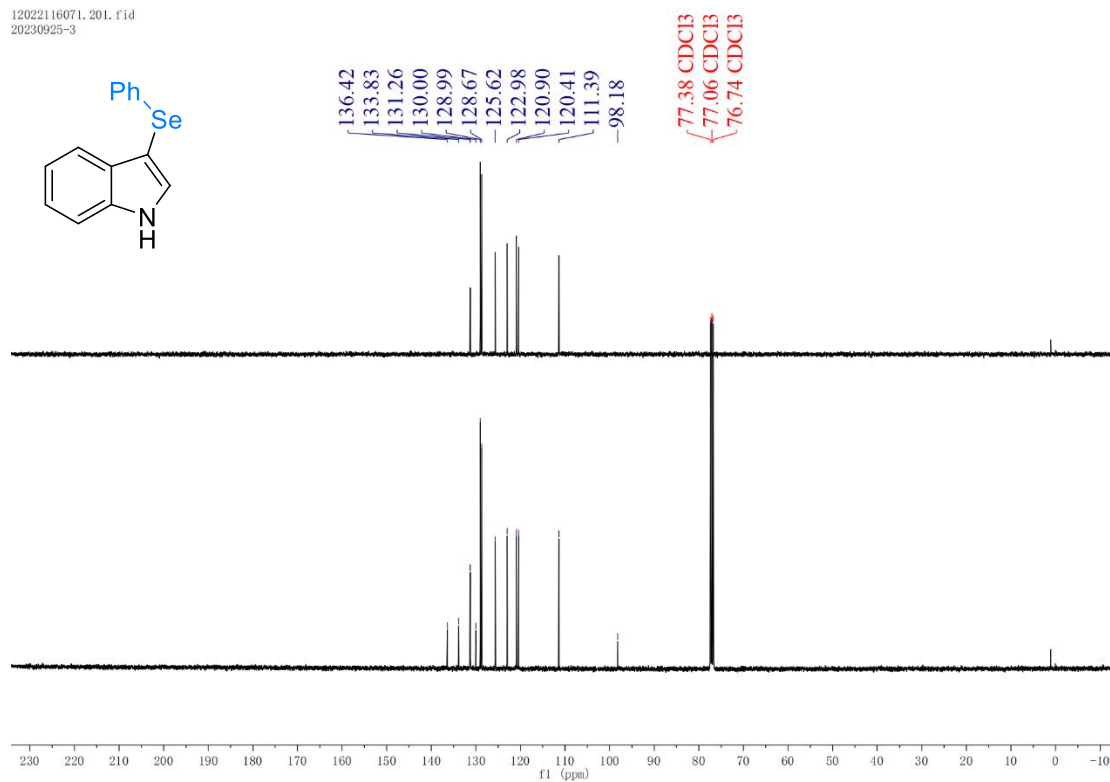

**<sup>13</sup>C-NMR (100 MHz, CDCl<sub>3</sub>) Spectra of compound 9a**

12022116071.242.fid  
20231013-1

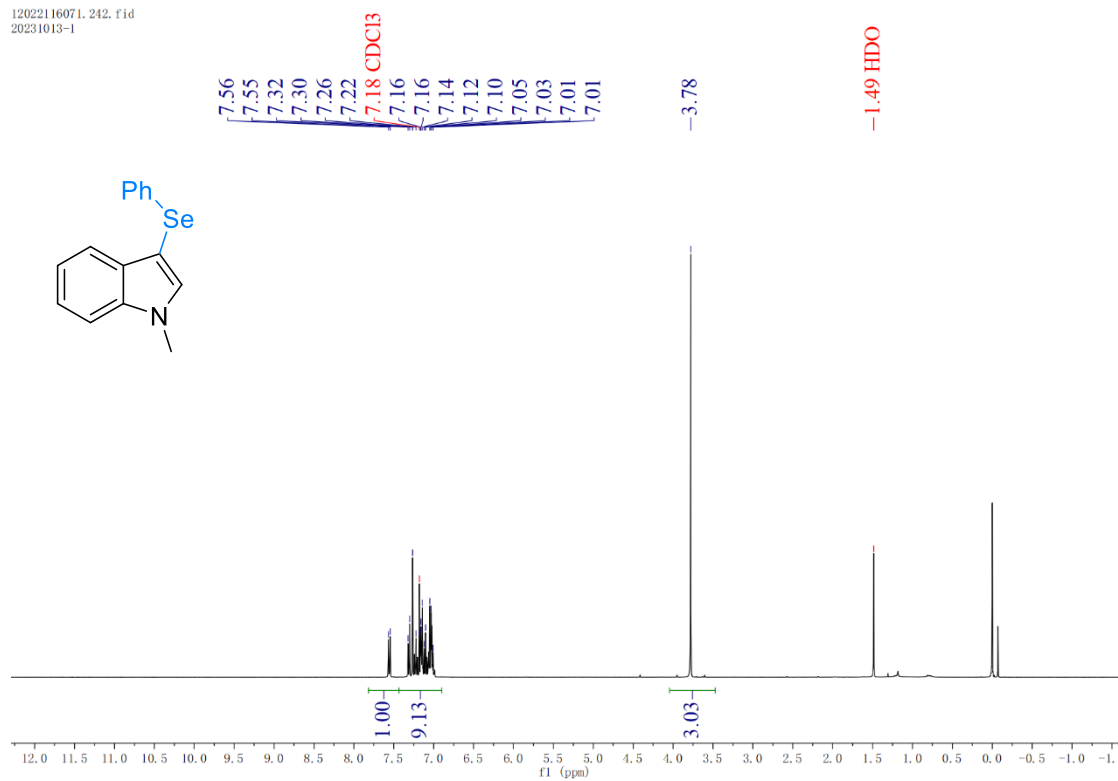

### <sup>1</sup>H-NMR (400 MHz, CDCl<sub>3</sub>) Spectra of compound 9b

12022116071.243.fid  
20231013-1

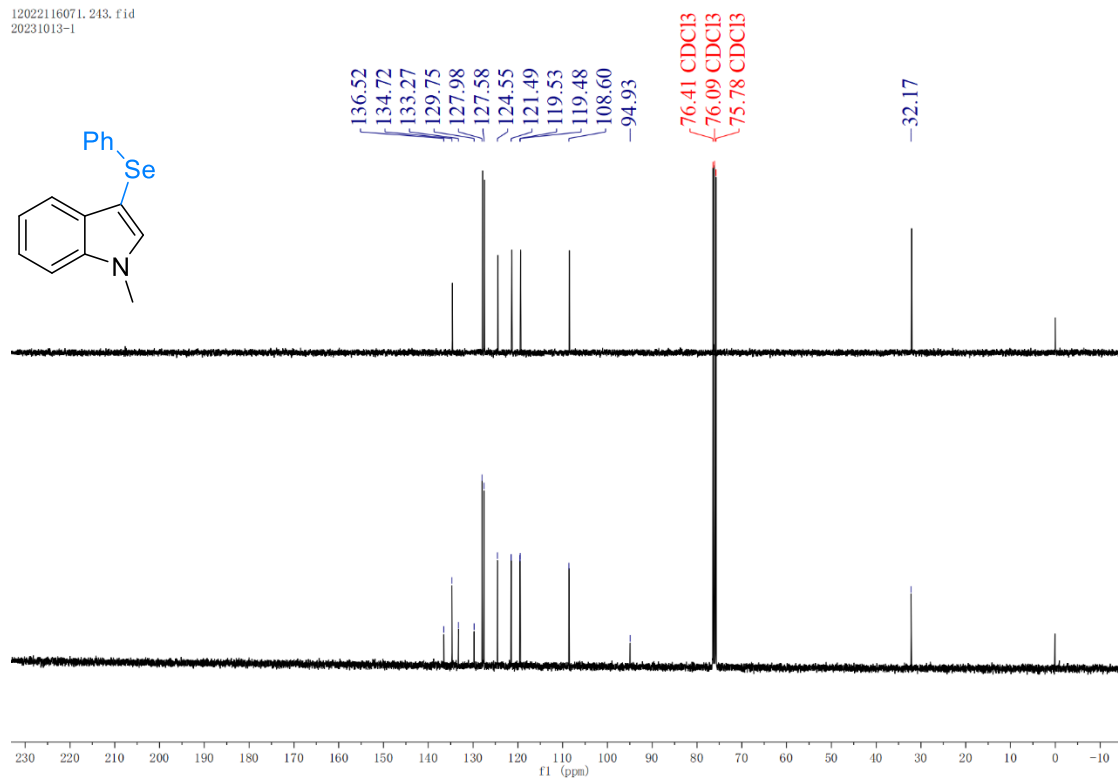

### <sup>13</sup>C-NMR (100 MHz, CDCl<sub>3</sub>) Spectra of compound 9b

12022116071.236.fid  
20231012-2

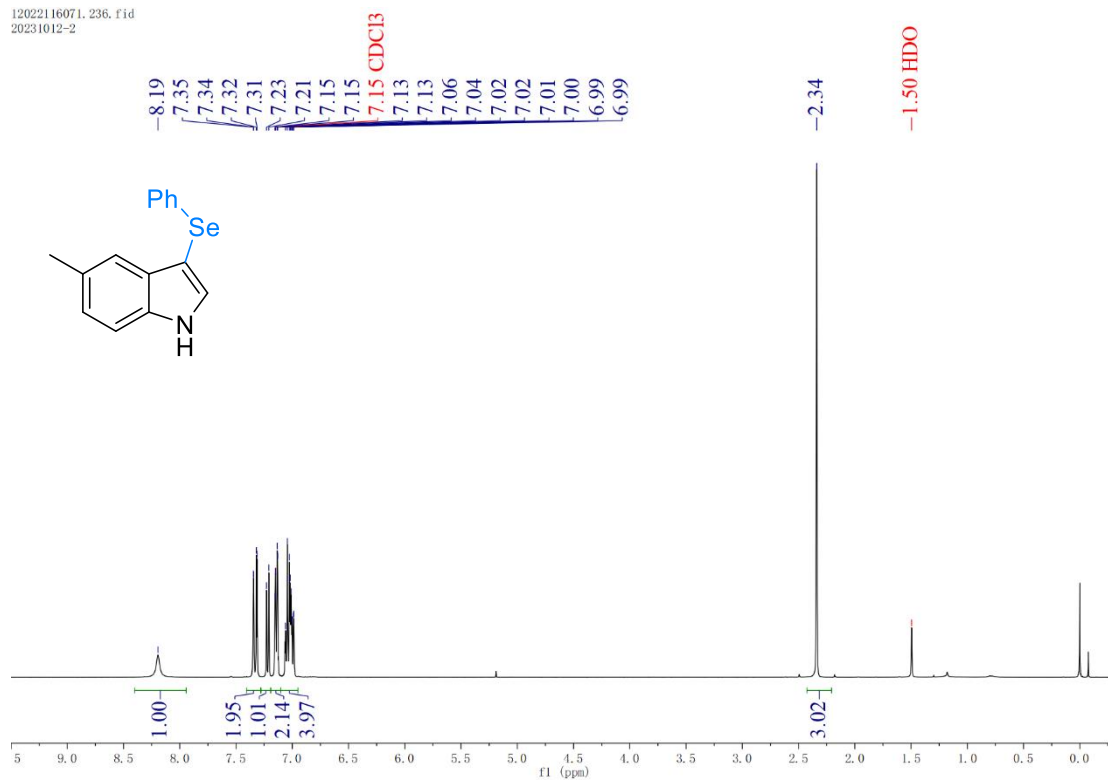

**<sup>1</sup>H-NMR (400 MHz, CDCl<sub>3</sub>) Spectra of compound 9c**

12022116071.237.fid  
20231012-2

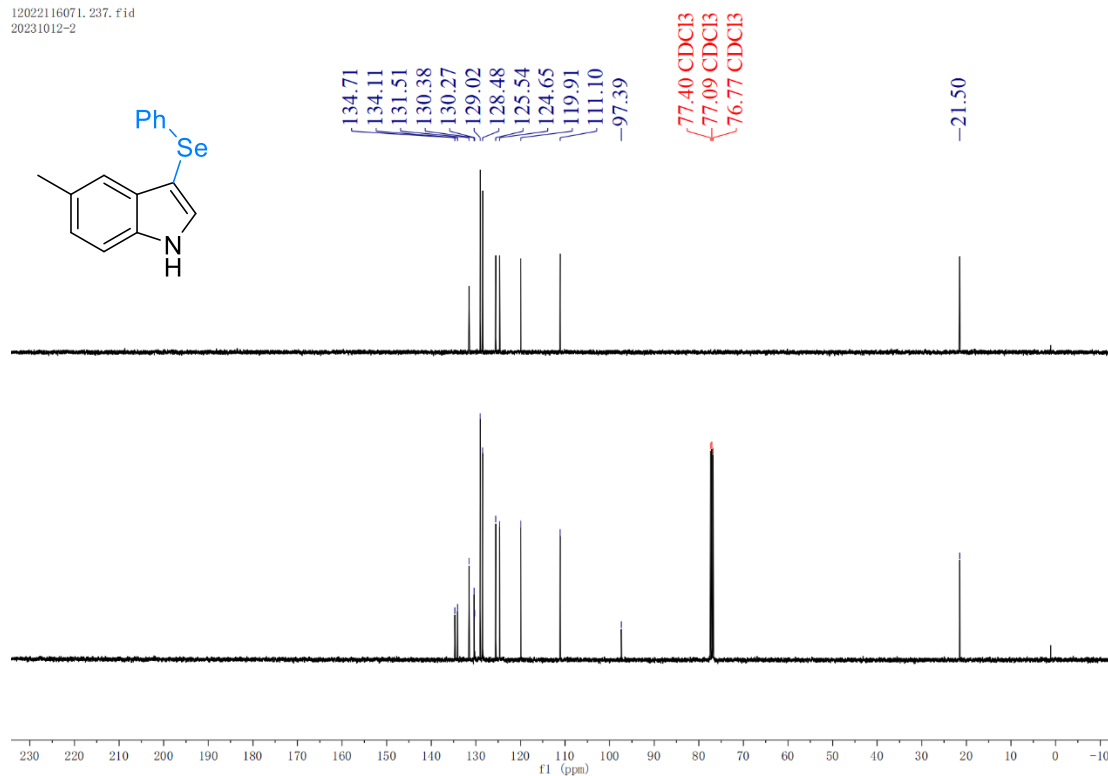

**<sup>13</sup>C-NMR (100 MHz, CDCl<sub>3</sub>) Spectra of compound 9c**



12022116071.254.fid  
20231016-1

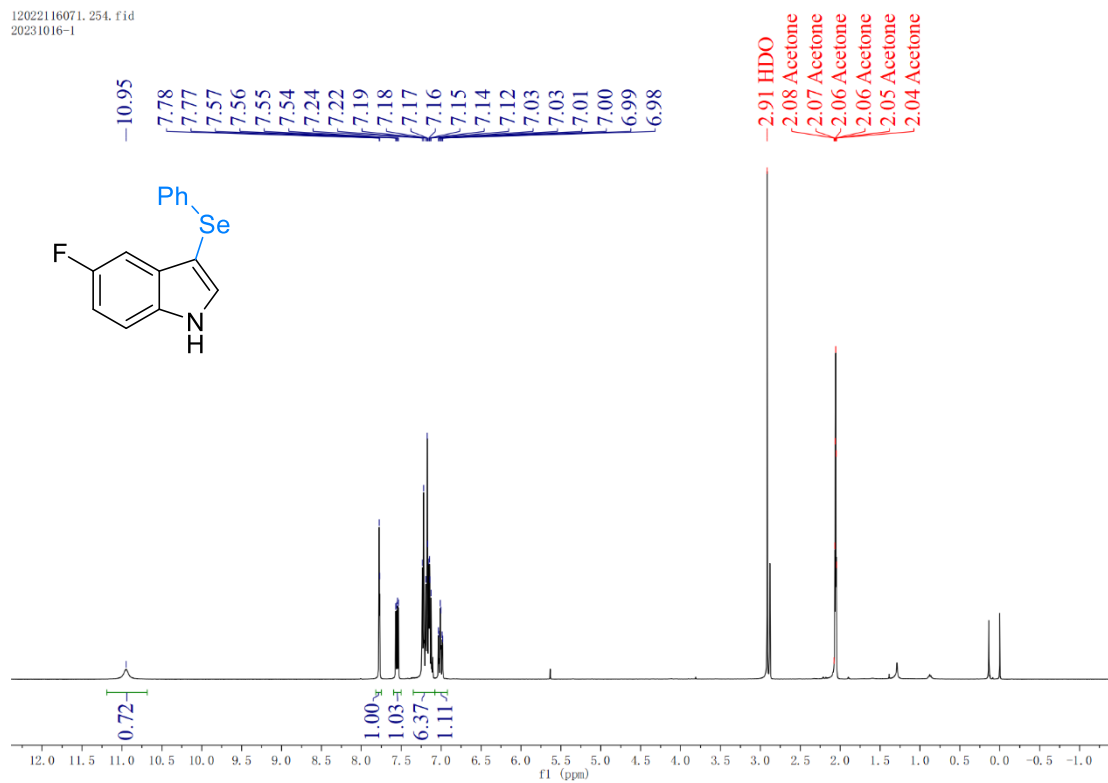

<sup>1</sup>H-NMR (400 MHz, Acetone-d<sub>6</sub>) Spectra of compound 9d

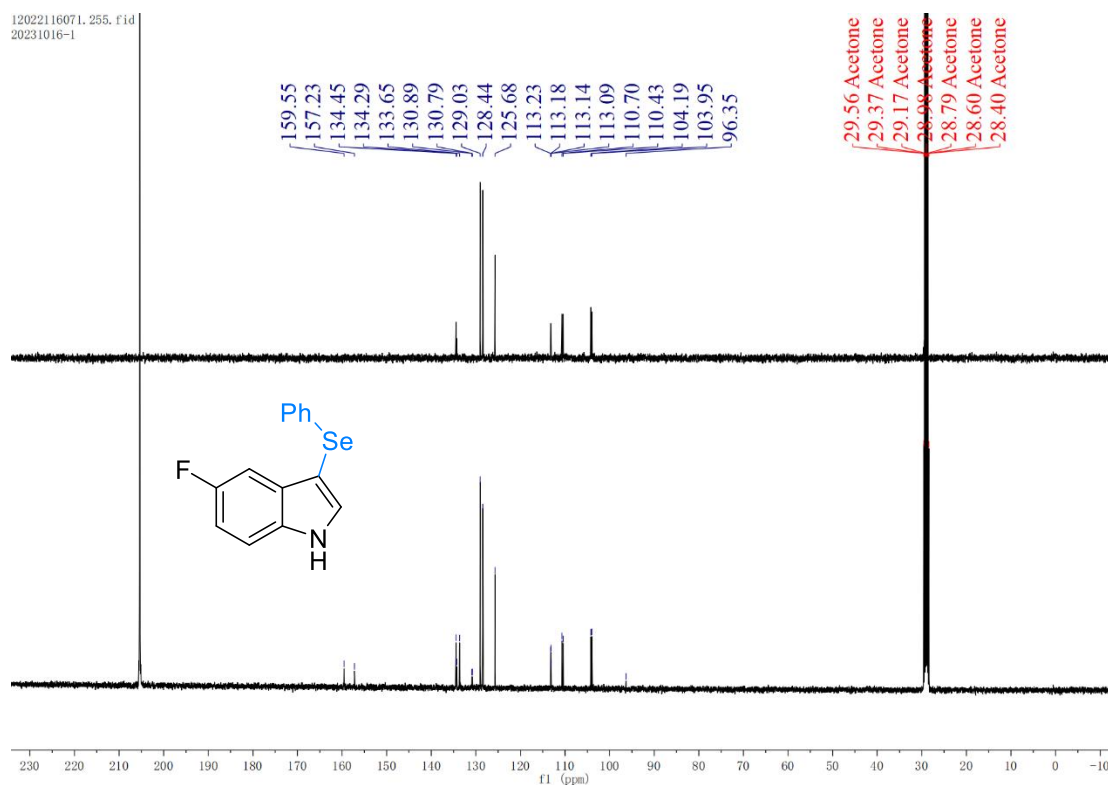

<sup>13</sup>C-NMR (100 MHz, CDCl<sub>3</sub>) Spectra of compound 9d

12022116071.257.fid  
20231016-1

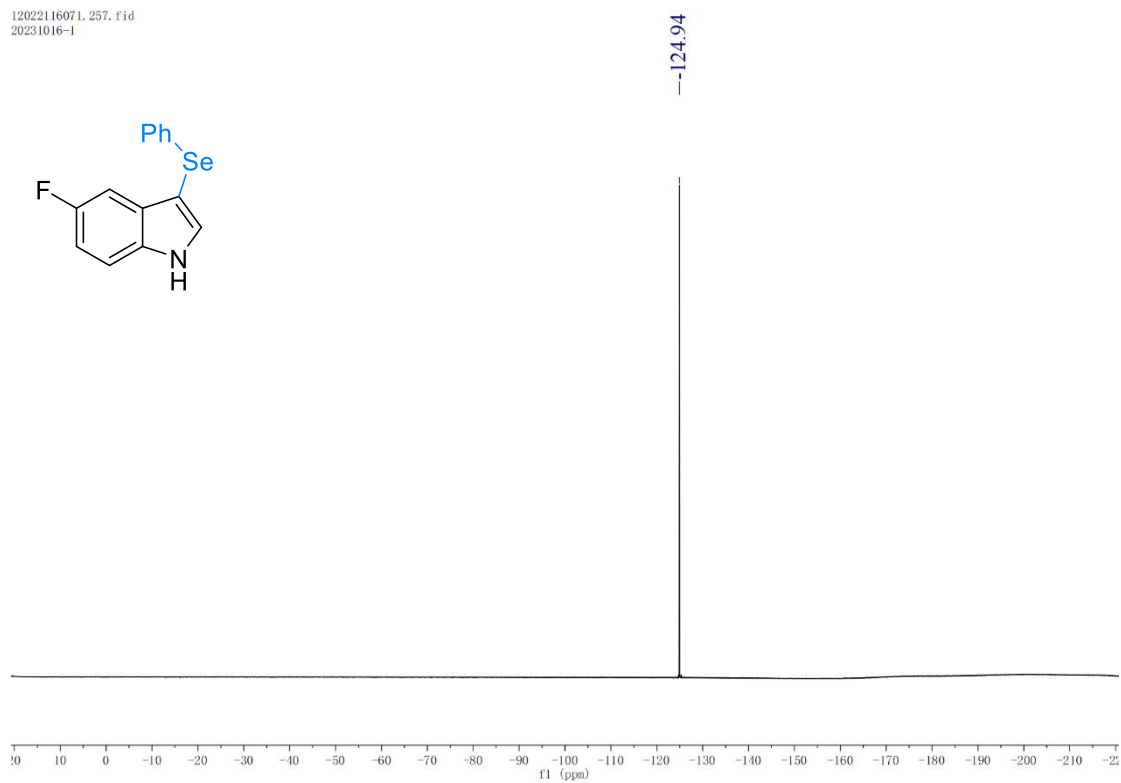

### $^{19}\text{F}$ NMR (376 MHz, $\text{CDCl}_3$ ) Spectrum of compound 9d

12022116071.233.fid  
20231012-1

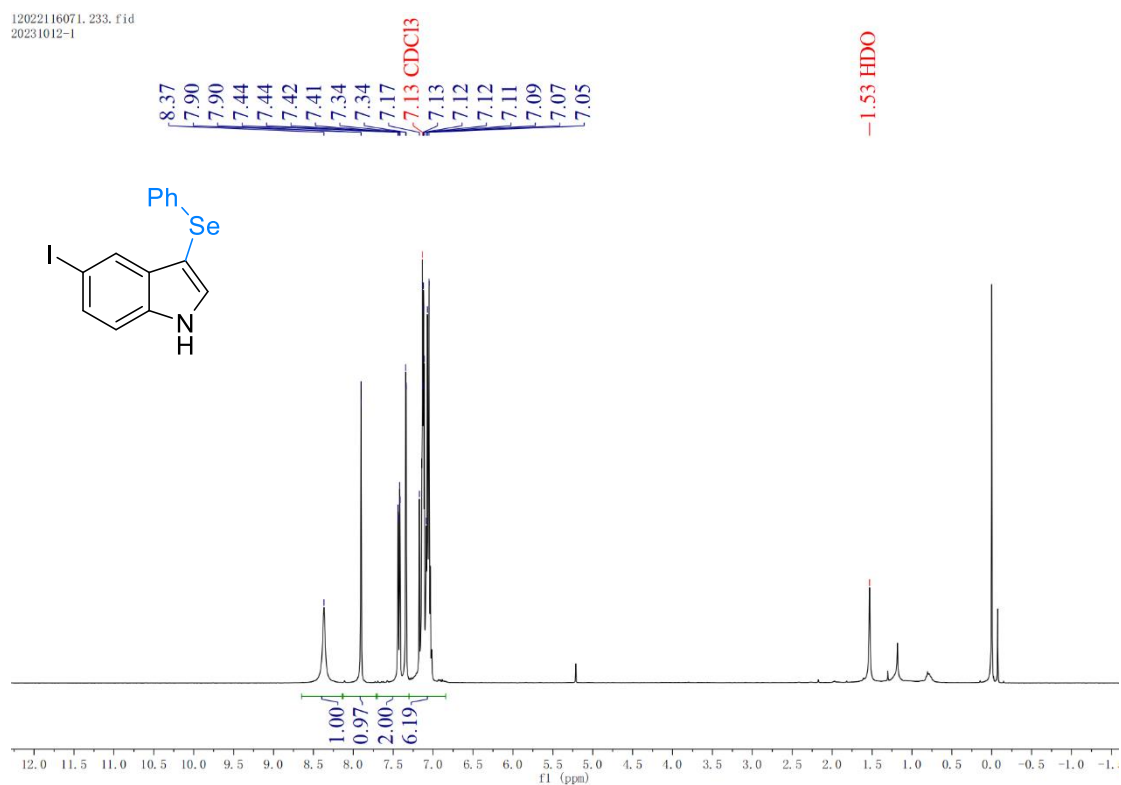

### $^1\text{H}$ -NMR (400 MHz, $\text{CDCl}_3$ ) Spectra of compound 9e

12022116071.234.fid  
20231012-1

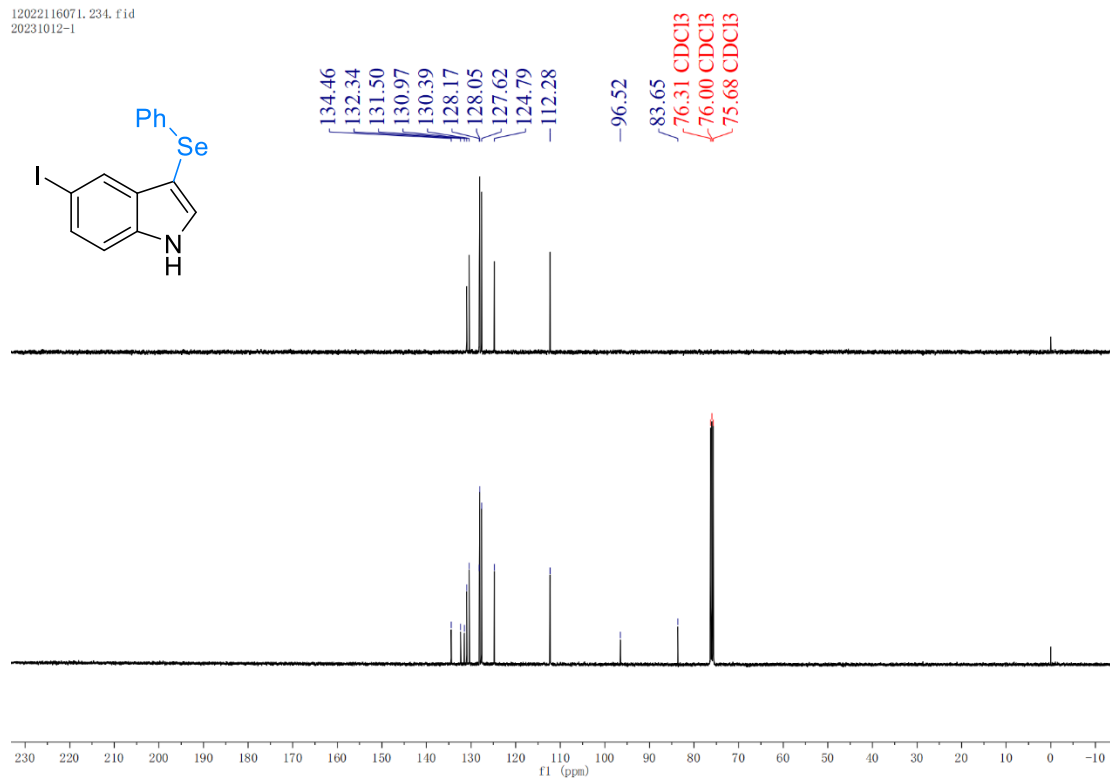

12022116071.267.fid  
20231018-1

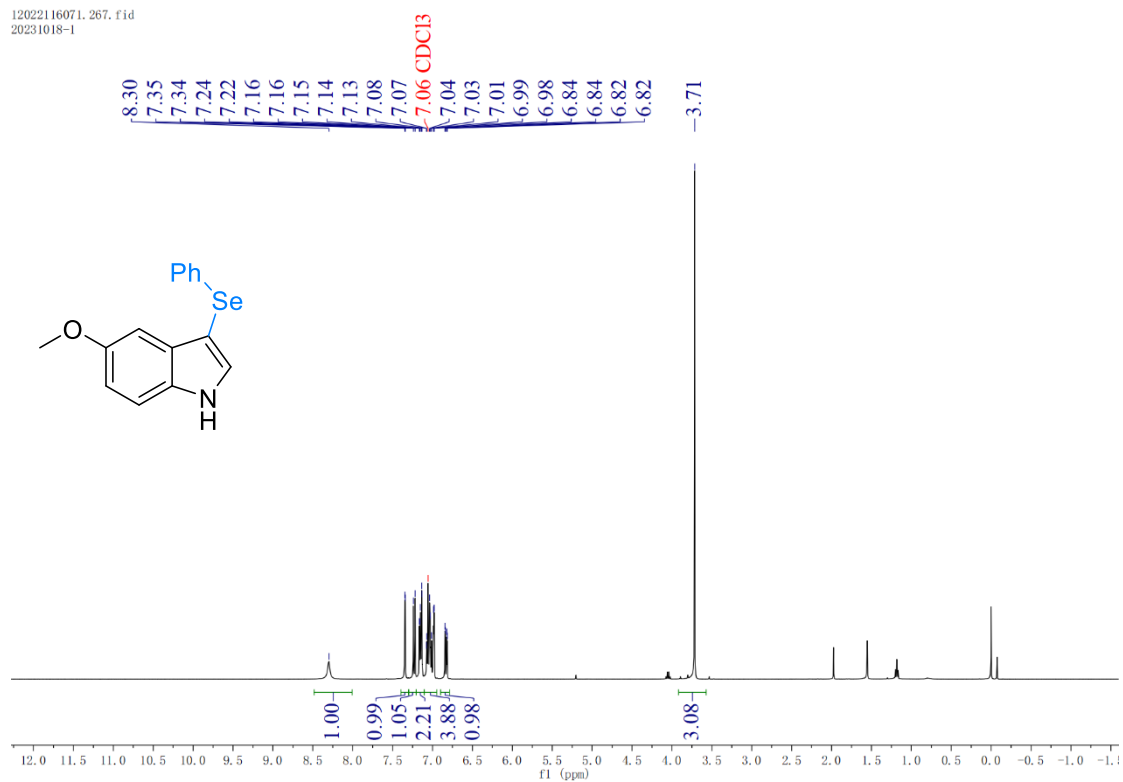

12022116071.268.fid  
20231018-1

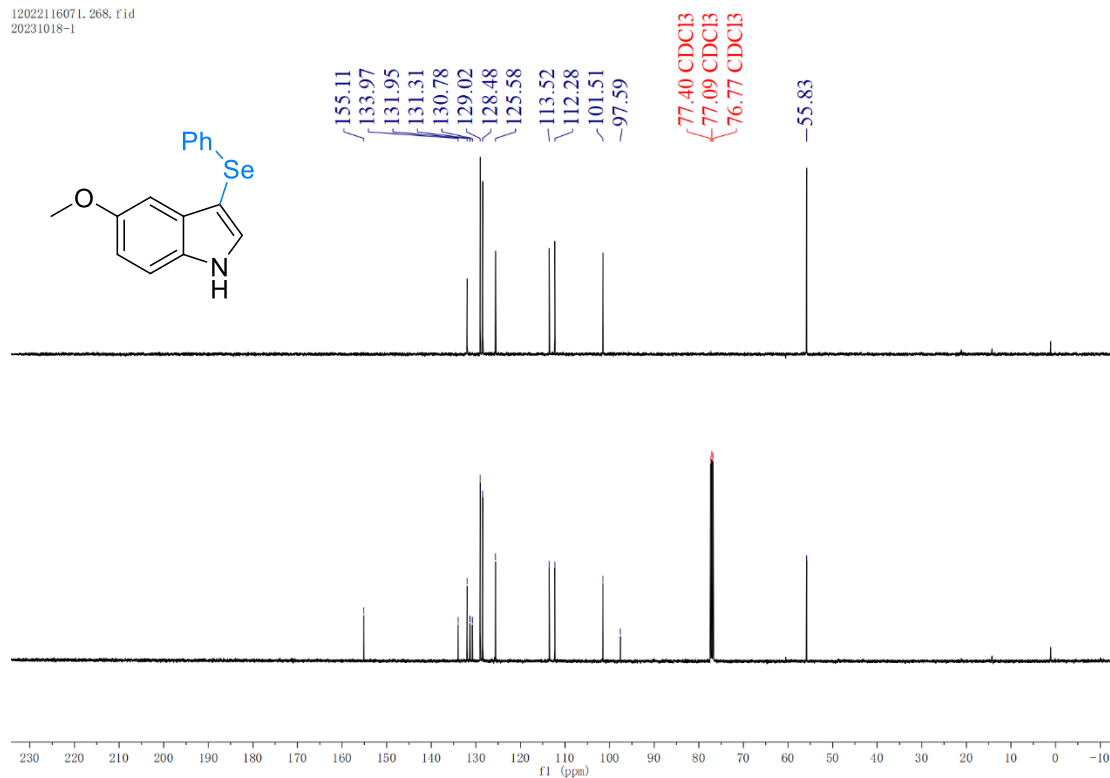

### <sup>13</sup>C-NMR (100 MHz, CDCl<sub>3</sub>) Spectra of compound 9f

12022116071.404.fid  
20240115-1

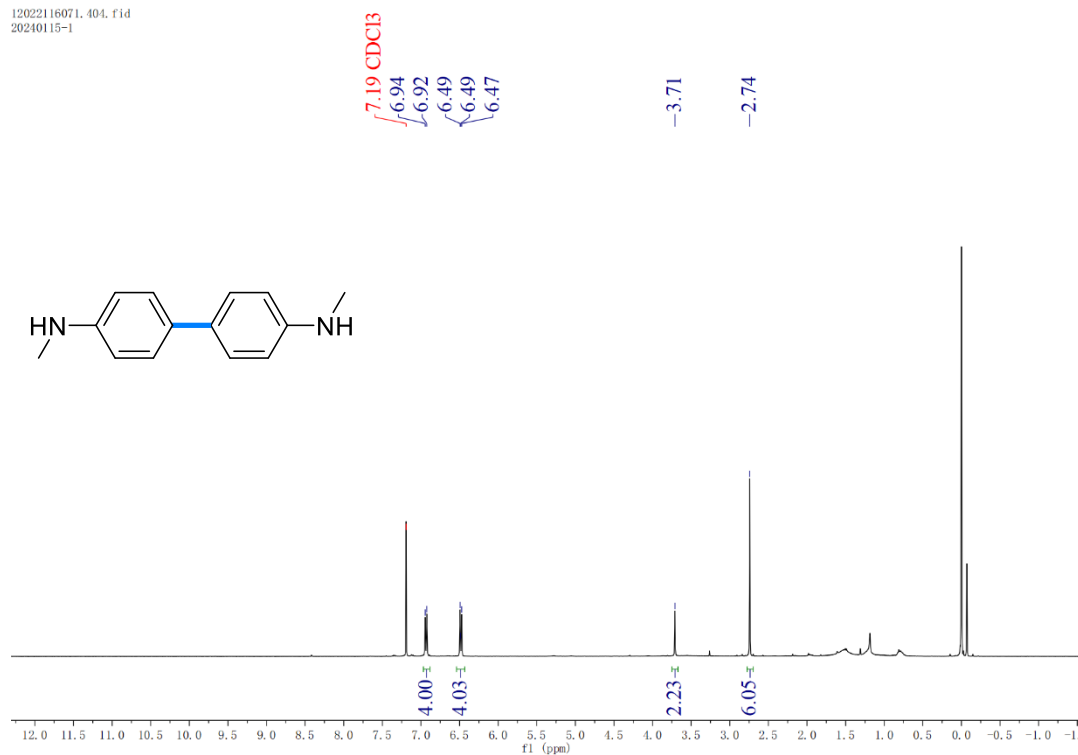

### <sup>1</sup>H-NMR (400 MHz, CDCl<sub>3</sub>) Spectra of compound 10a

12022116071.405.fid  
20240115-1

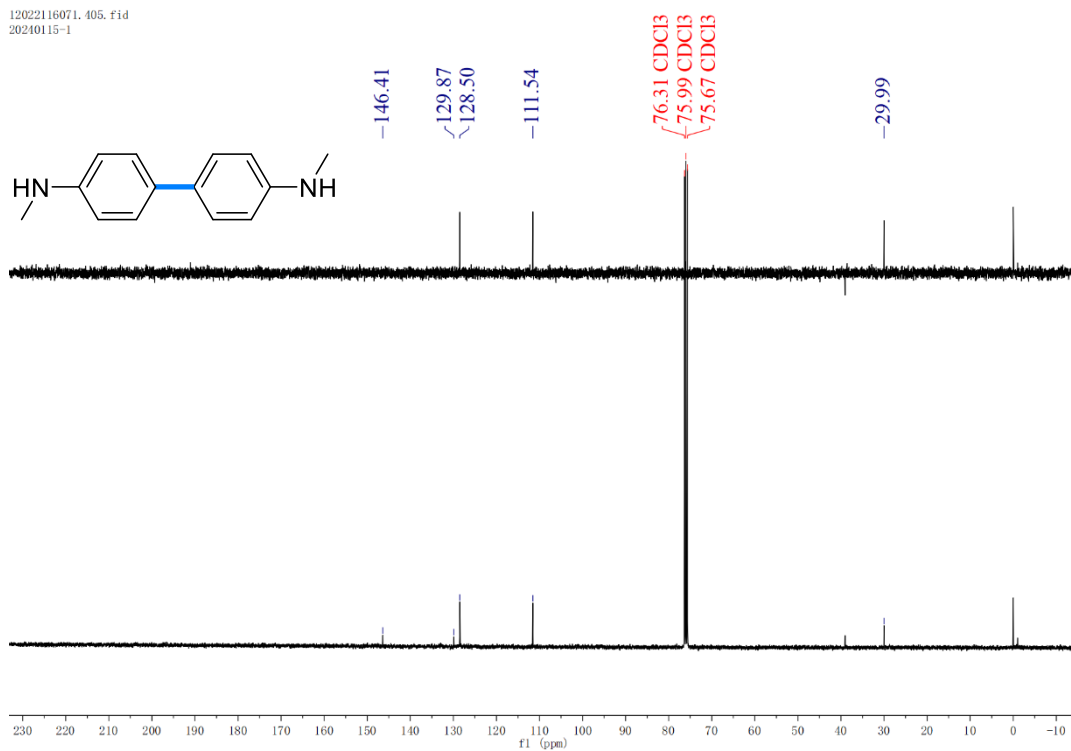

<sup>13</sup>C-NMR (100 MHz, CDCl<sub>3</sub>) Spectra of compound 10a

22.558.fid

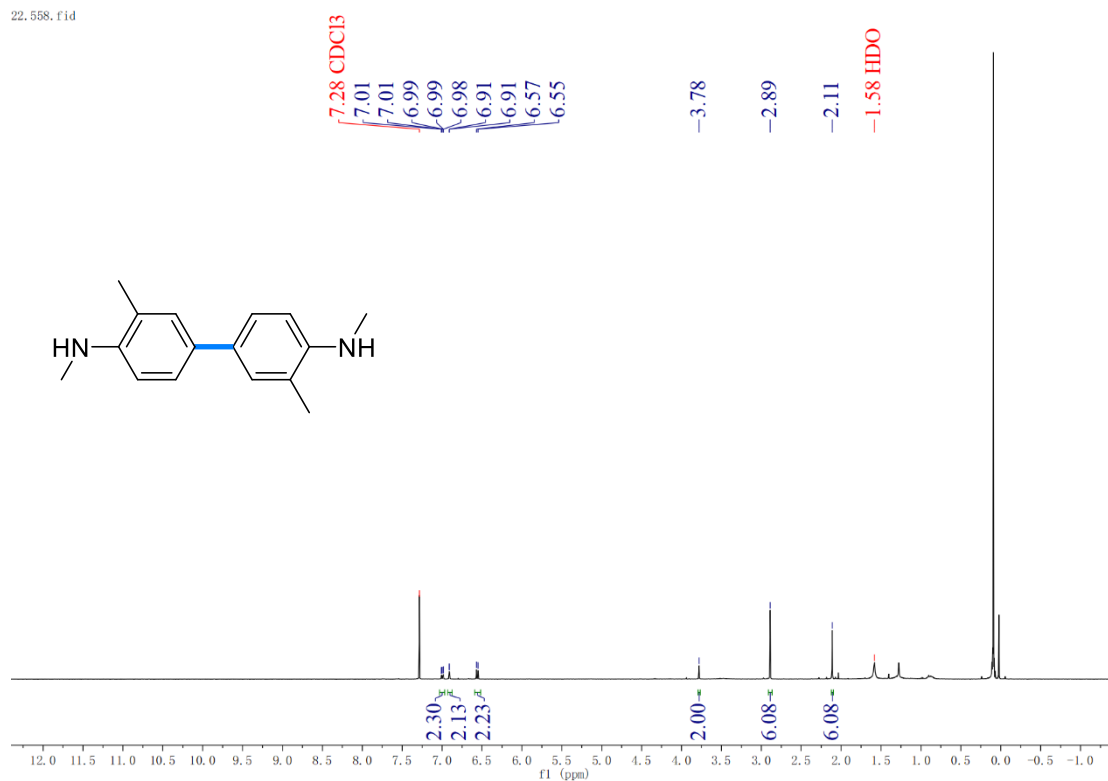

<sup>1</sup>H-NMR (400 MHz, CDCl<sub>3</sub>) Spectra of compound 10b

12022116071.560.fid  
20240823-7-1

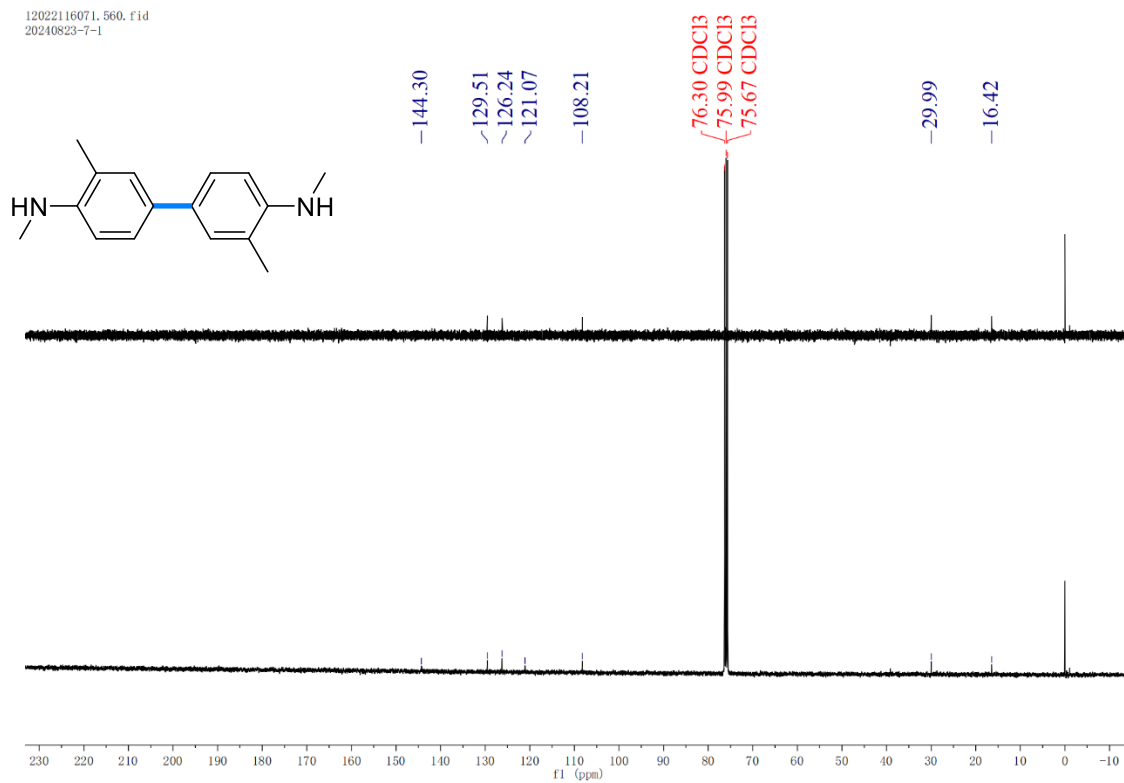

### <sup>13</sup>C-NMR (100 MHz, CDCl<sub>3</sub>) Spectra of compound 10b

12022116071.213.fid  
20240823-7-2

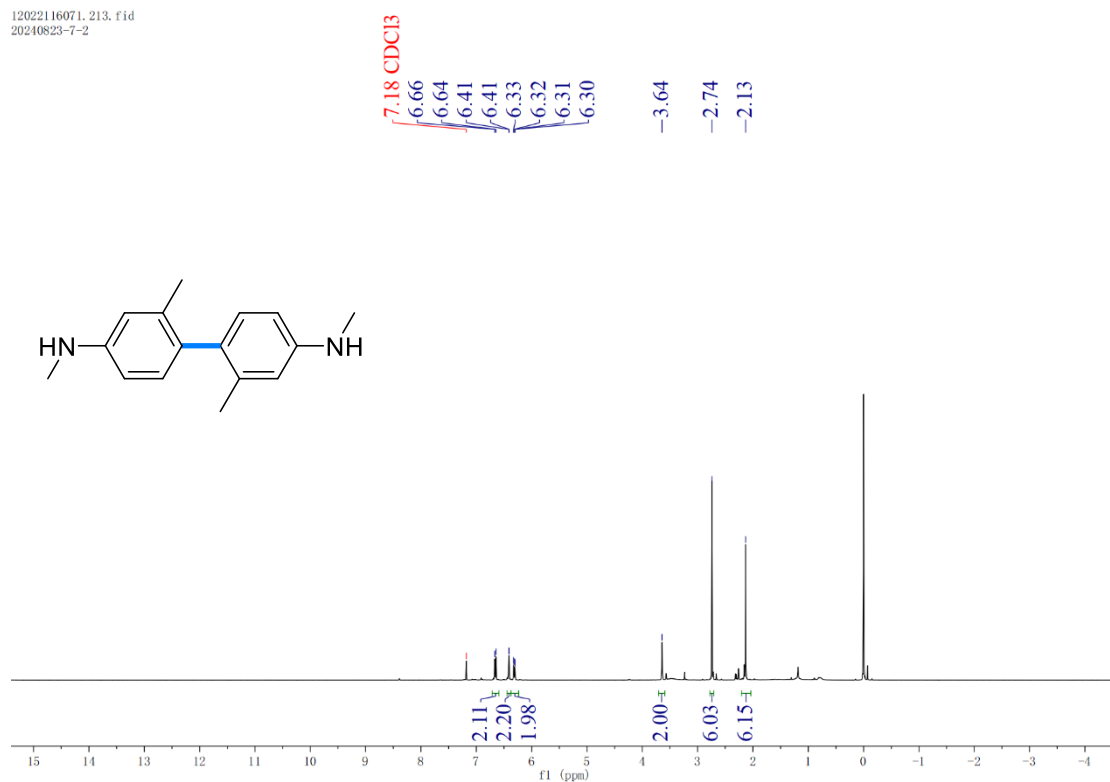

### <sup>1</sup>H-NMR (400 MHz, CDCl<sub>3</sub>) Spectra of compound 10c

12022116071.574.fid  
20240823-7-2

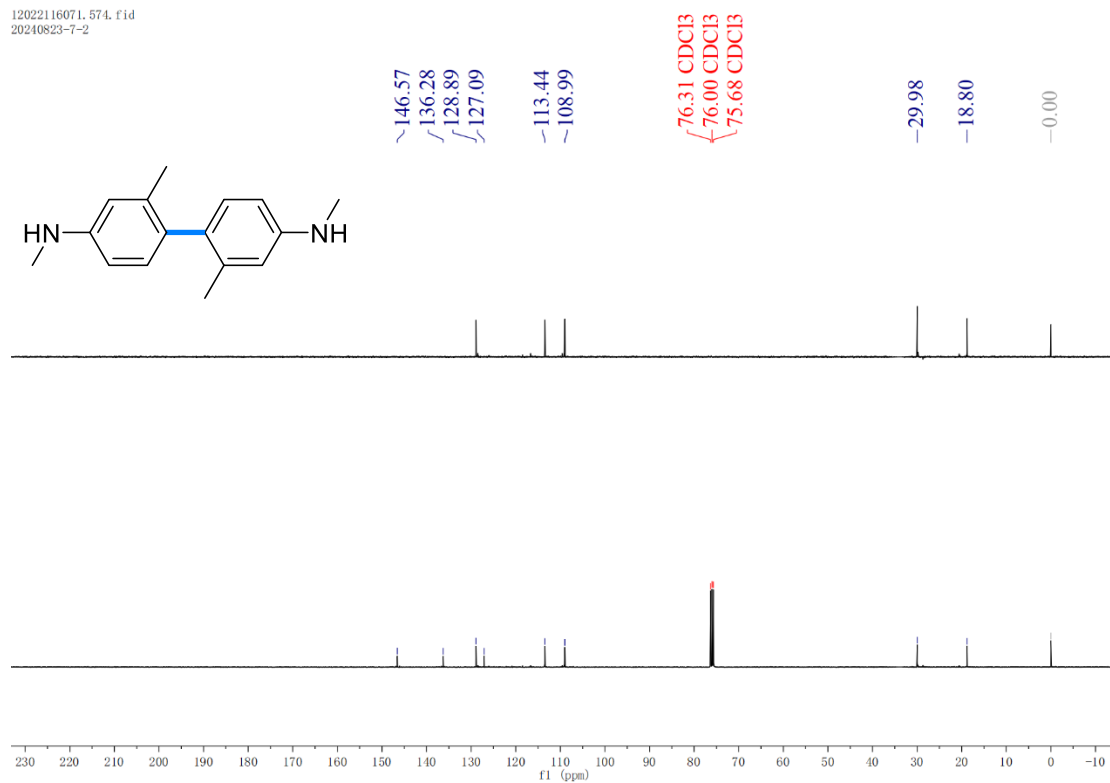

### $^{13}\text{C-NMR}$ (100 MHz, $\text{CDCl}_3$ ) Spectra of compound 10c

12022116071.562.fid  
20240823-9

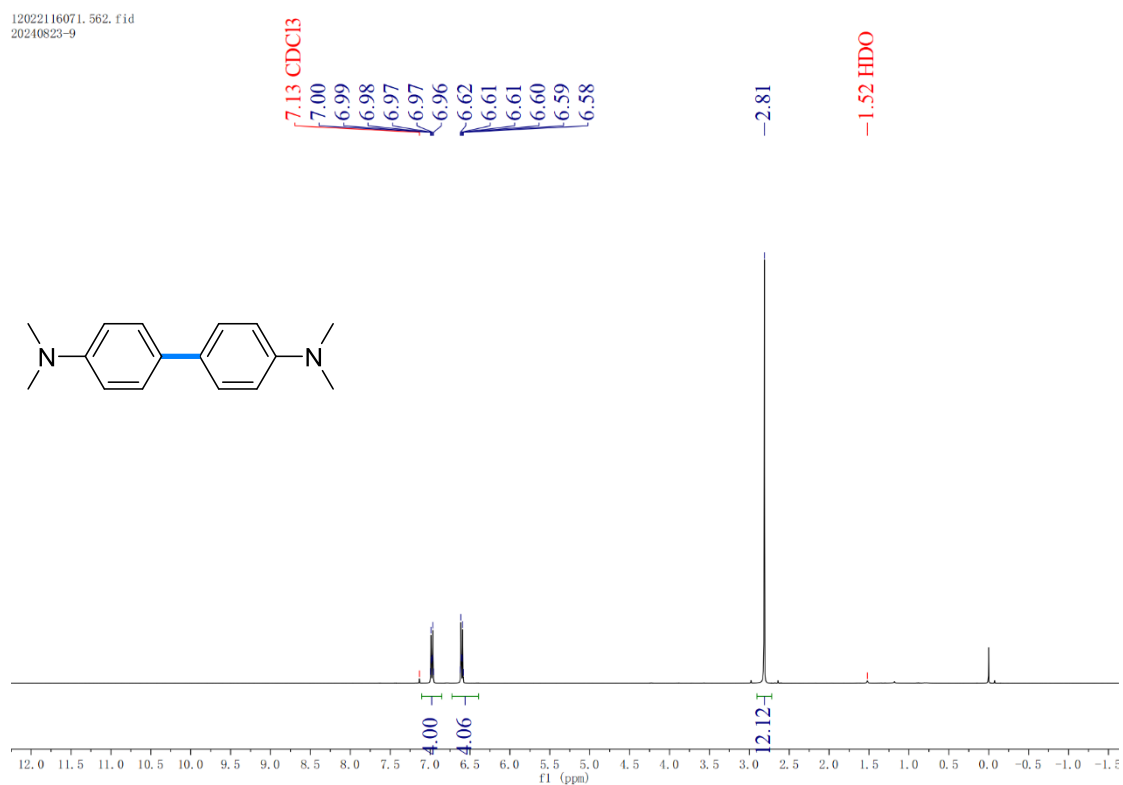

### $^1\text{H-NMR}$ (400 MHz, $\text{CDCl}_3$ ) Spectra of compound 10d

12022116071.563.fid  
20240823-9

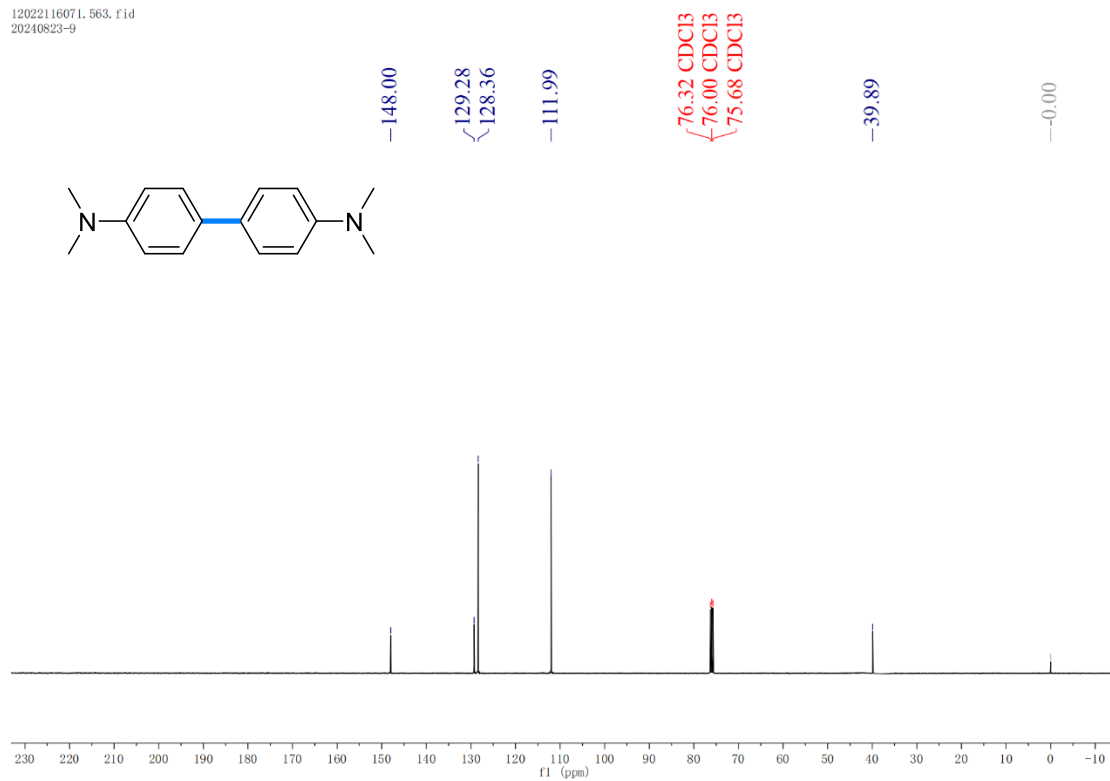

### <sup>13</sup>C-NMR (100 MHz, CDCl<sub>3</sub>) Spectra of compound 10d

12022116071.257.fid  
20240909-12

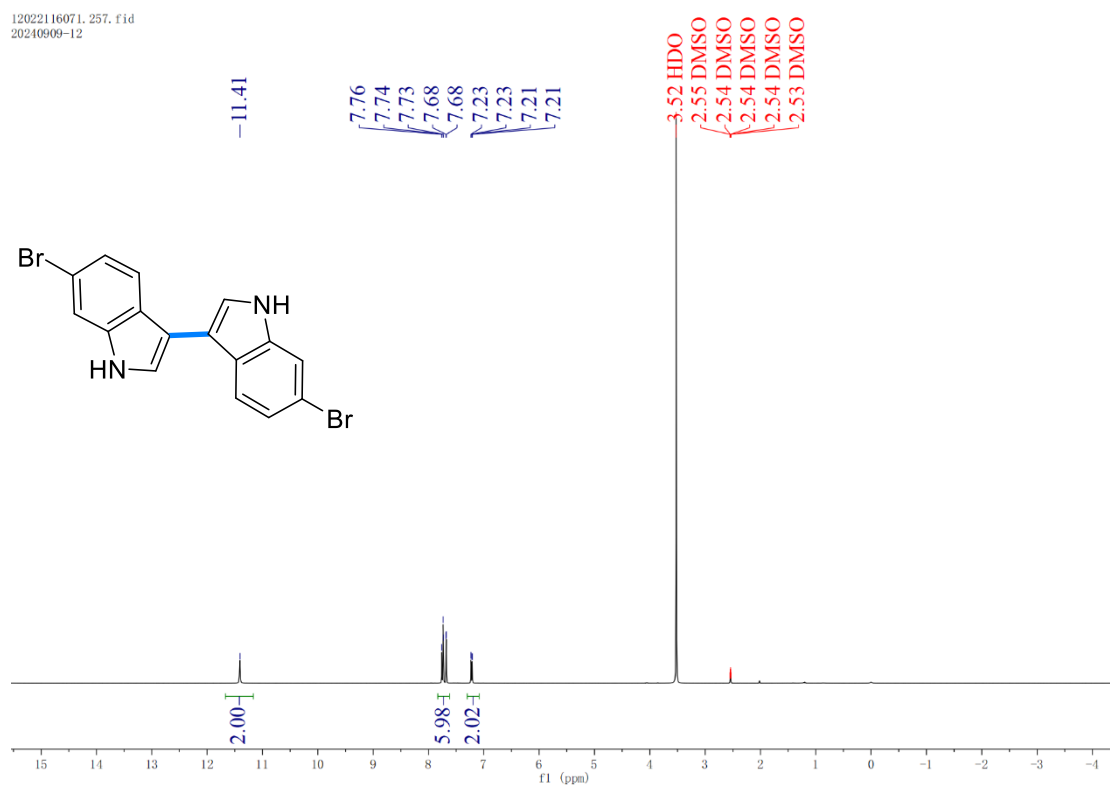

### <sup>1</sup>H-NMR (400 MHz, DMSO-*d*<sub>6</sub>) Spectra of compound 10e



12022116071.258.fid  
20240909-12

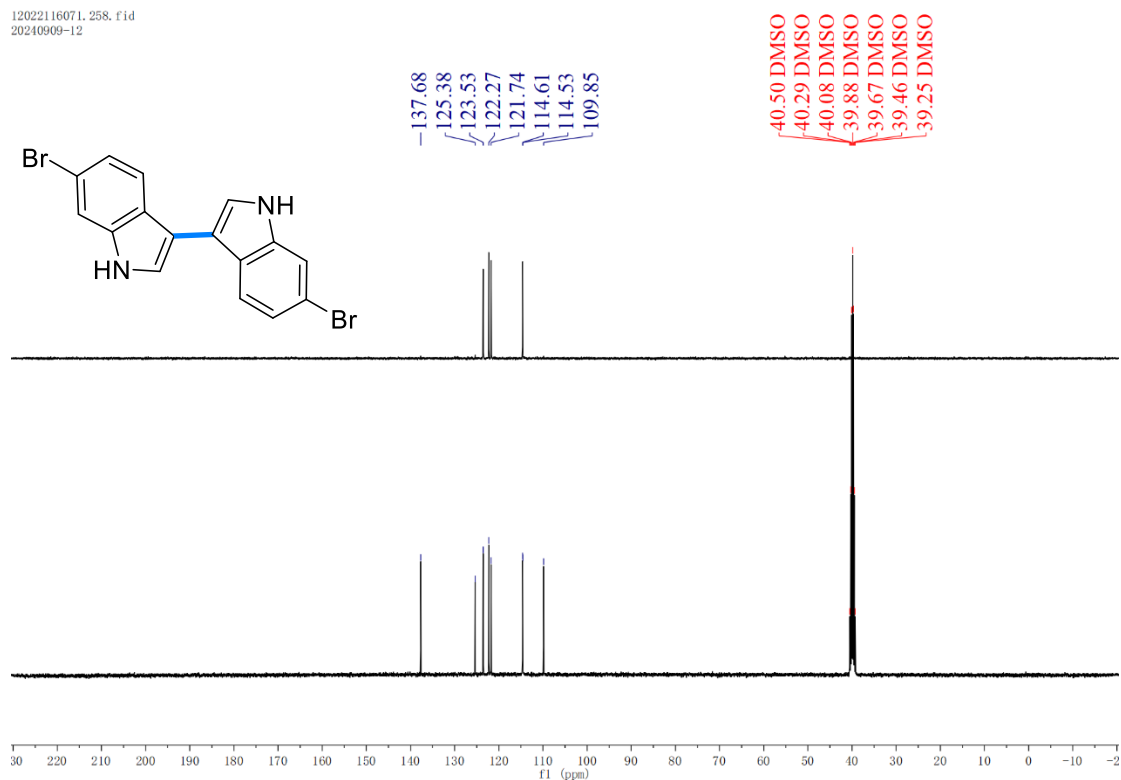

### <sup>13</sup>C-NMR (100 MHz, DMSO-*d*<sub>6</sub>) Spectra of compound 10e

12022116071.115.fid  
20240308-1

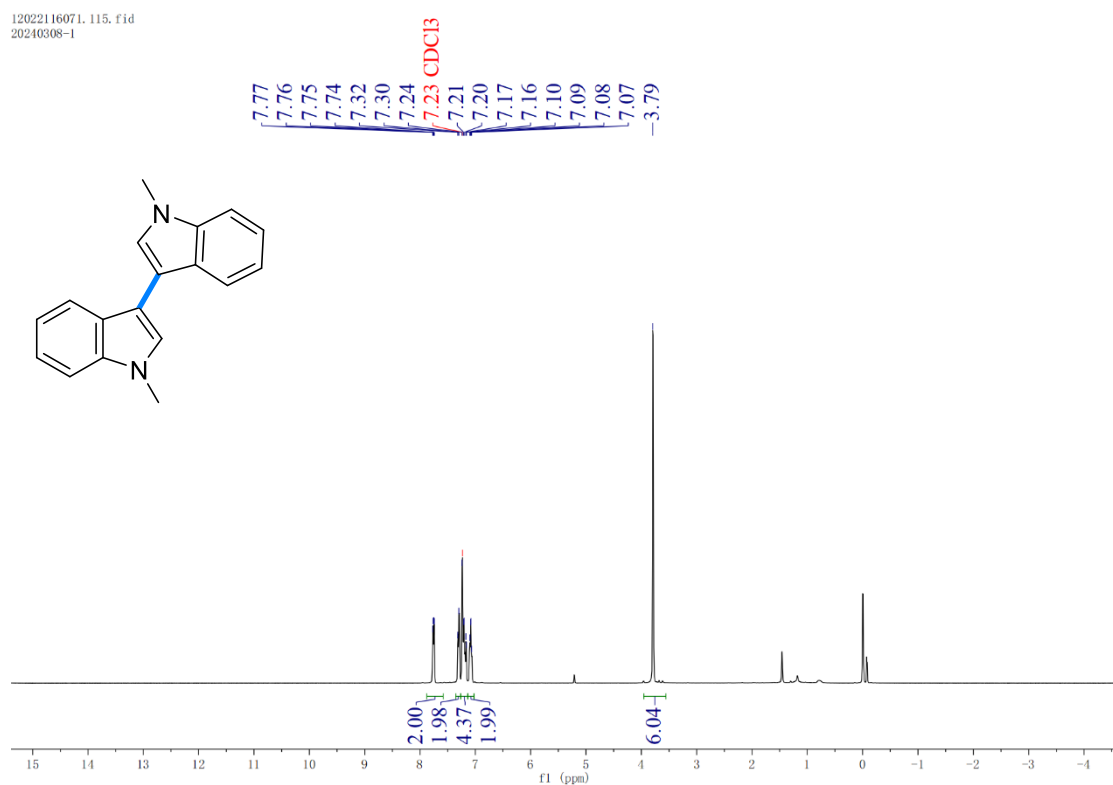

### <sup>1</sup>H-NMR (400 MHz, CDCl<sub>3</sub>) Spectra of compound 10f

12022116071.435.fid  
20240308-1

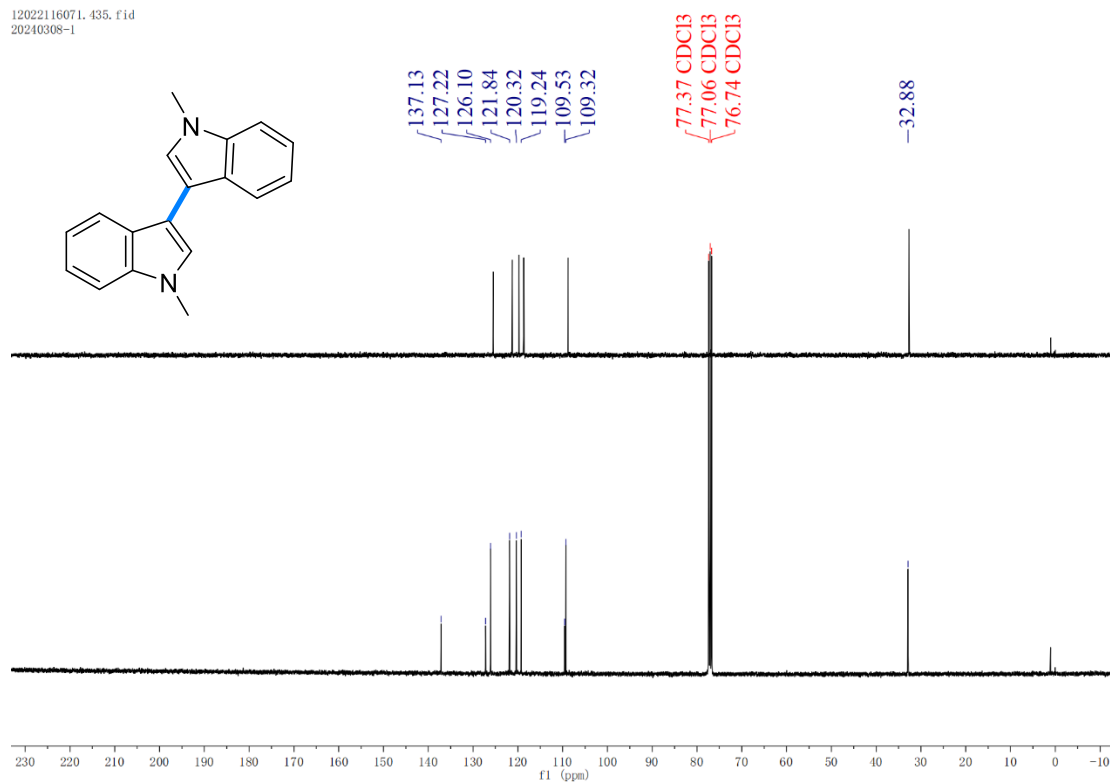

### <sup>13</sup>C-NMR (100 MHz, CDCl<sub>3</sub>) Spectra of compound 10f

12022116071.416.fid  
20240305-1

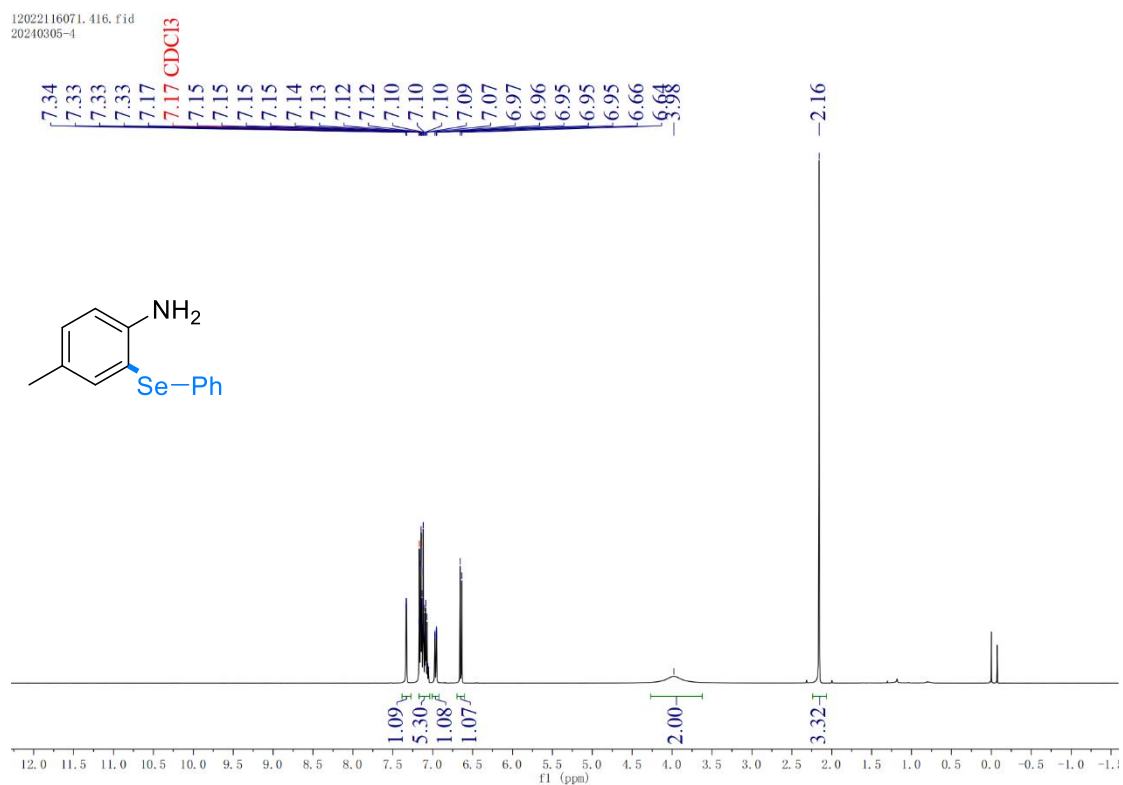

### <sup>1</sup>H-NMR (400 MHz, CDCl<sub>3</sub>) Spectra of compound 8m

12022116071\_417.fid  
20240305-4

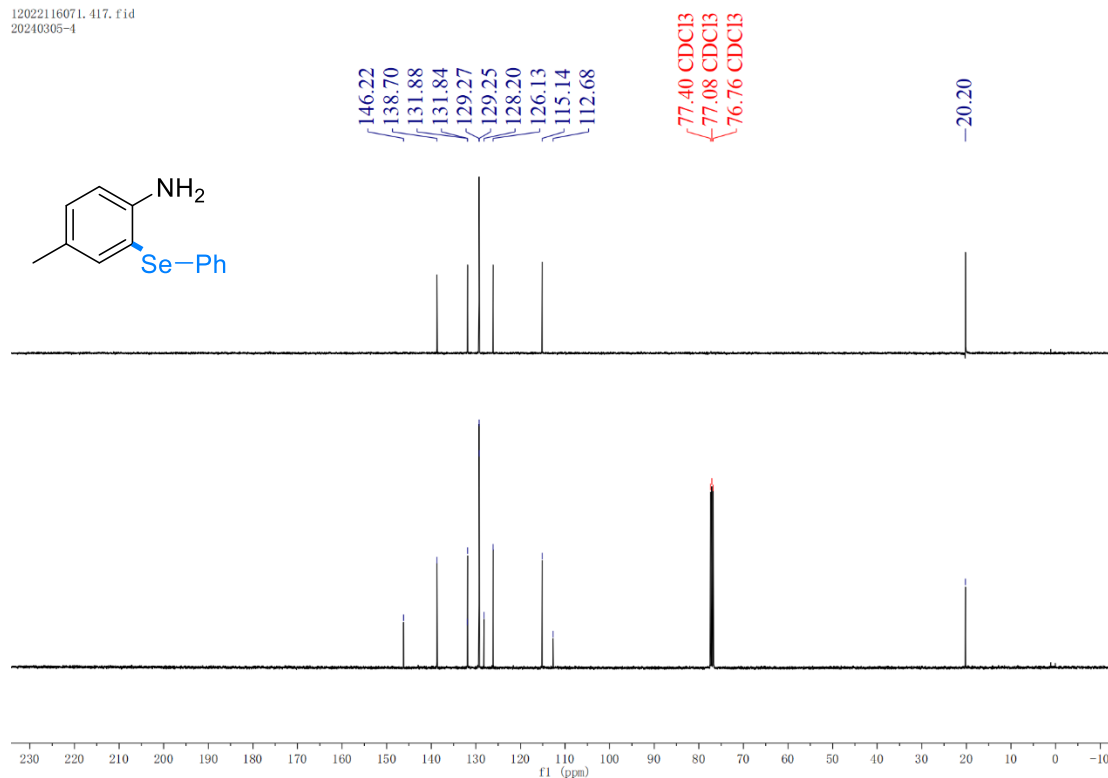

### <sup>13</sup>C-NMR (100 MHz, CDCl<sub>3</sub>) Spectra of compound 8m

12022116071\_262.fid  
20240919-1

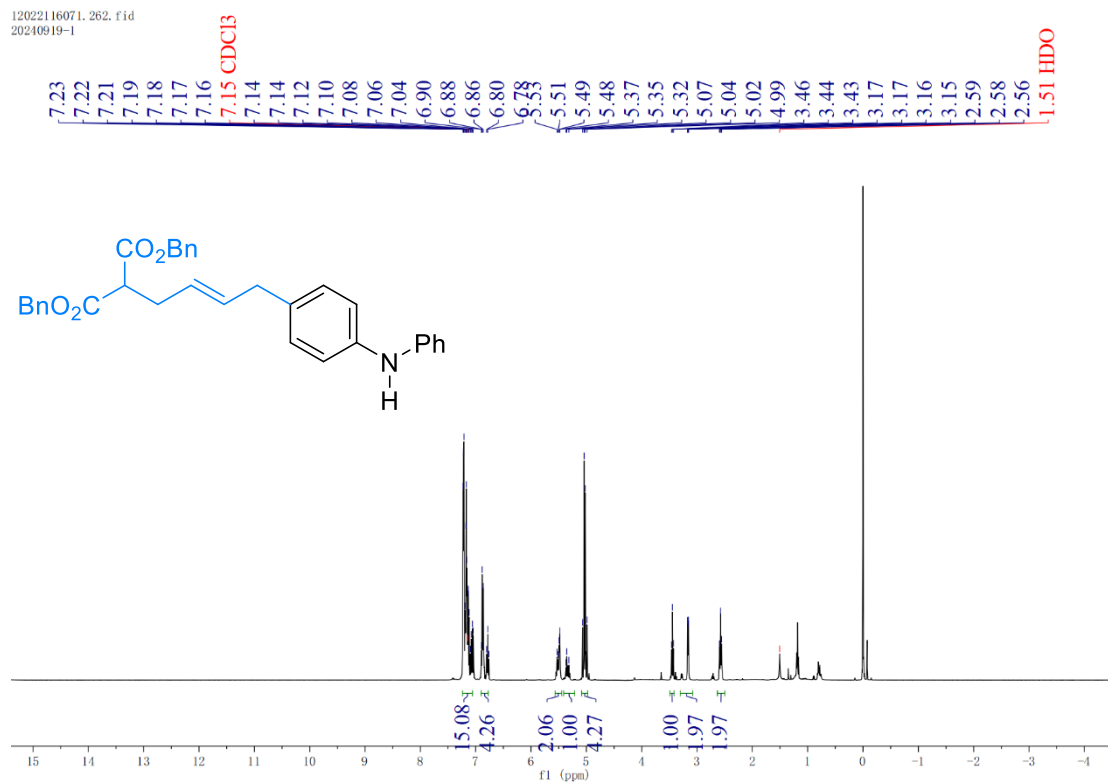

### <sup>1</sup>H-NMR (400 MHz, CDCl<sub>3</sub>) Spectra of compound 11

12022116071.597.fid  
20240919-1

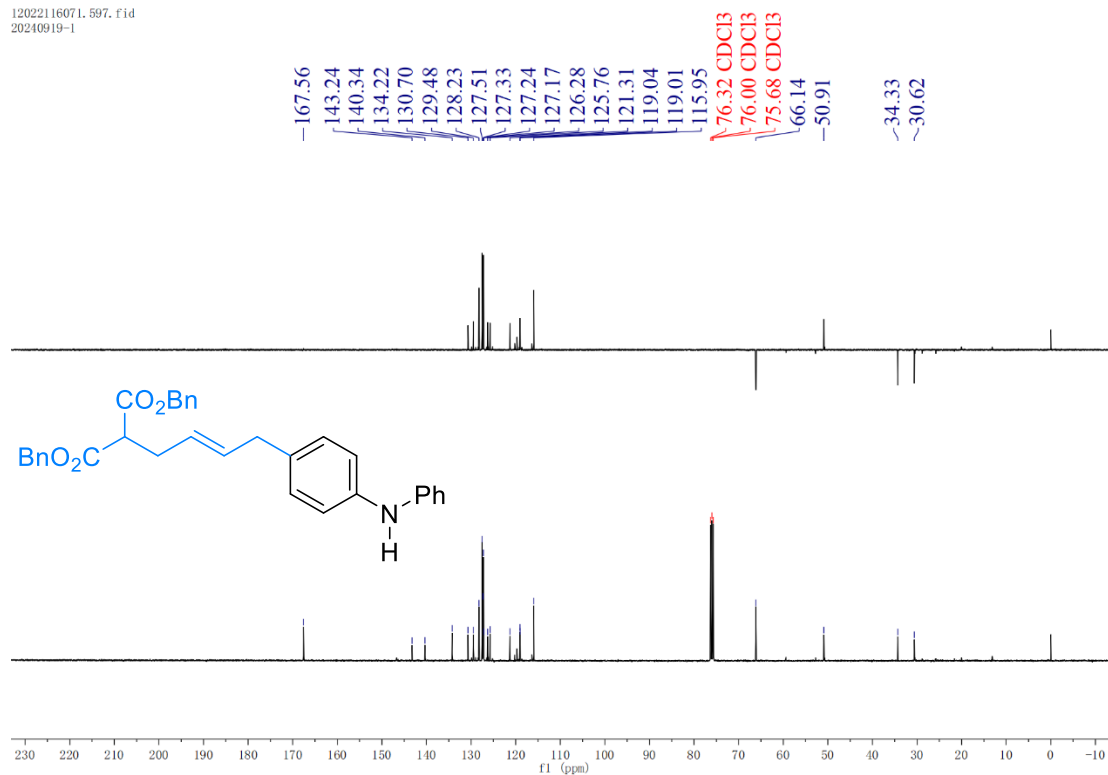

### <sup>13</sup>C-NMR (100 MHz, CDCl<sub>3</sub>) Spectra of compound 11

12022116071.272.fid  
20241218-1

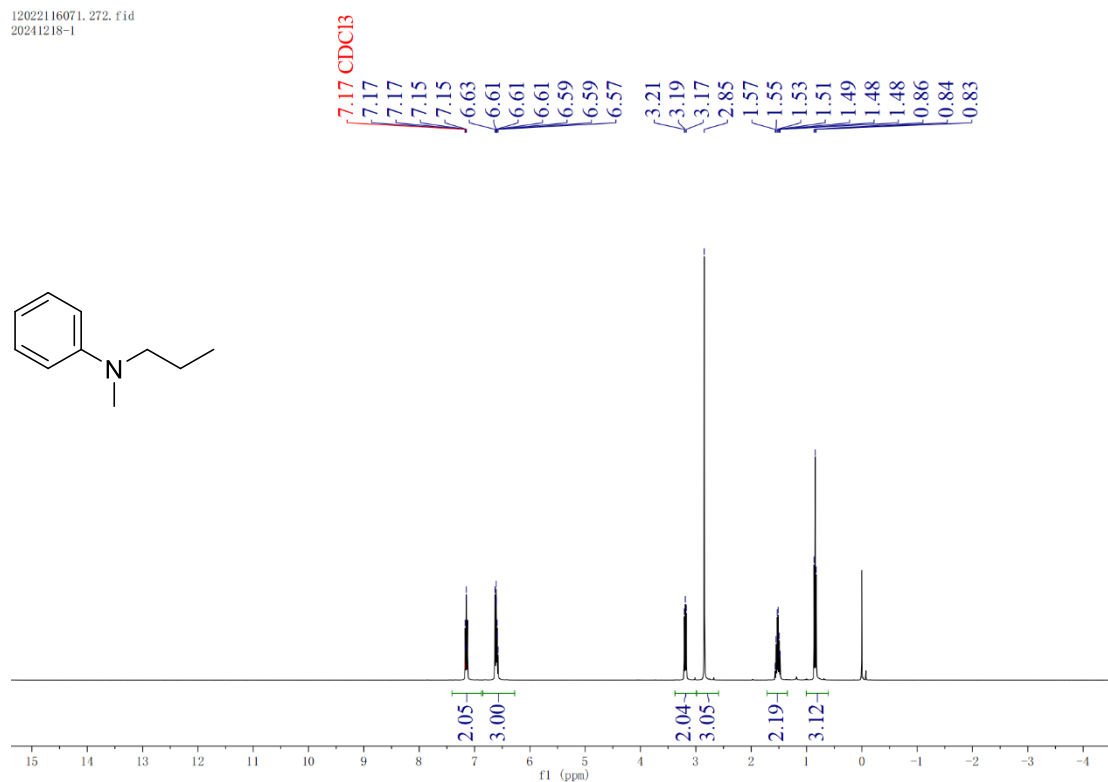

### <sup>1</sup>H-NMR (400 MHz, CDCl<sub>3</sub>) Spectra of compound 13

12022116071.600.fid  
20241218-1

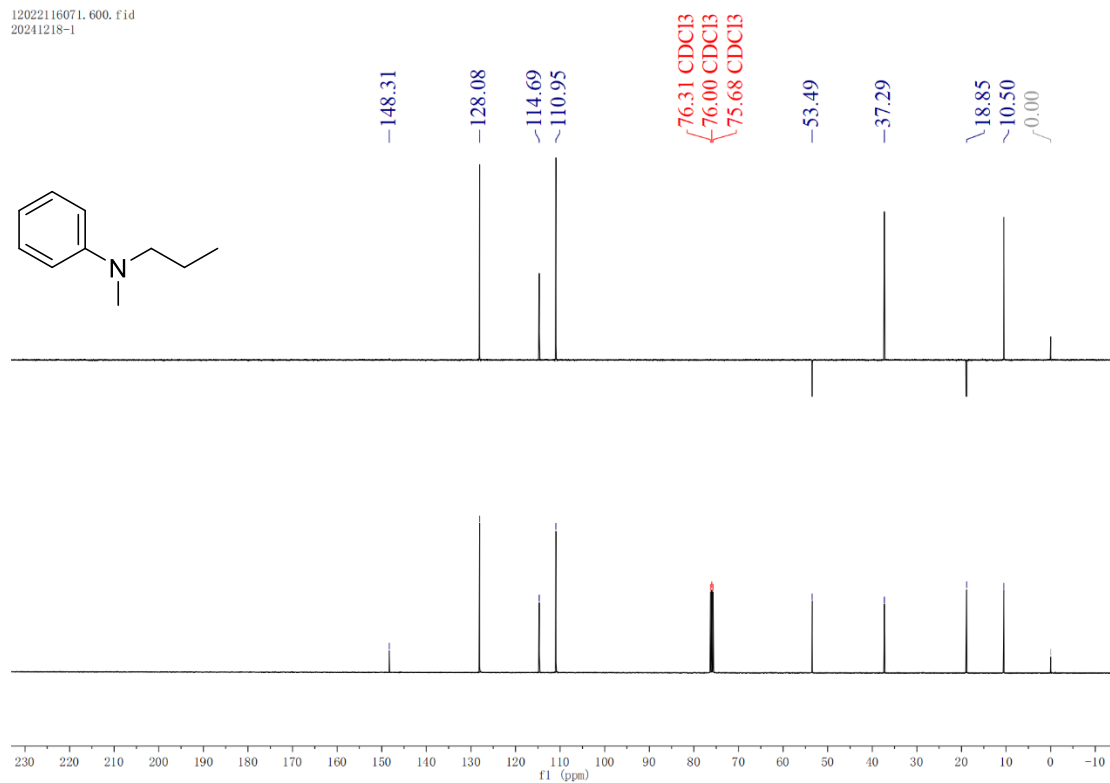

### <sup>13</sup>C-NMR (100 MHz, CDCl<sub>3</sub>) Spectra of compound 13

12022116071.339.fid  
20231120-2

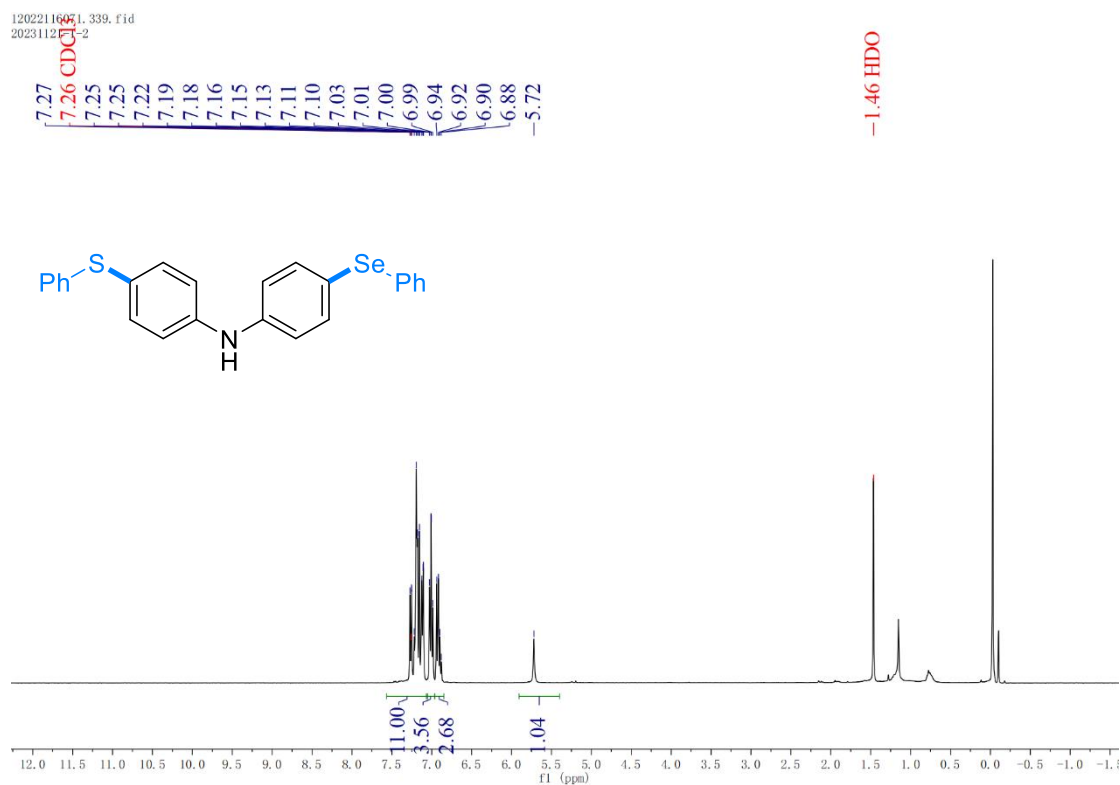

### <sup>1</sup>H-NMR (400 MHz, CDCl<sub>3</sub>) Spectra of compound 14

12022116071.340.fid  
20231121-1-2

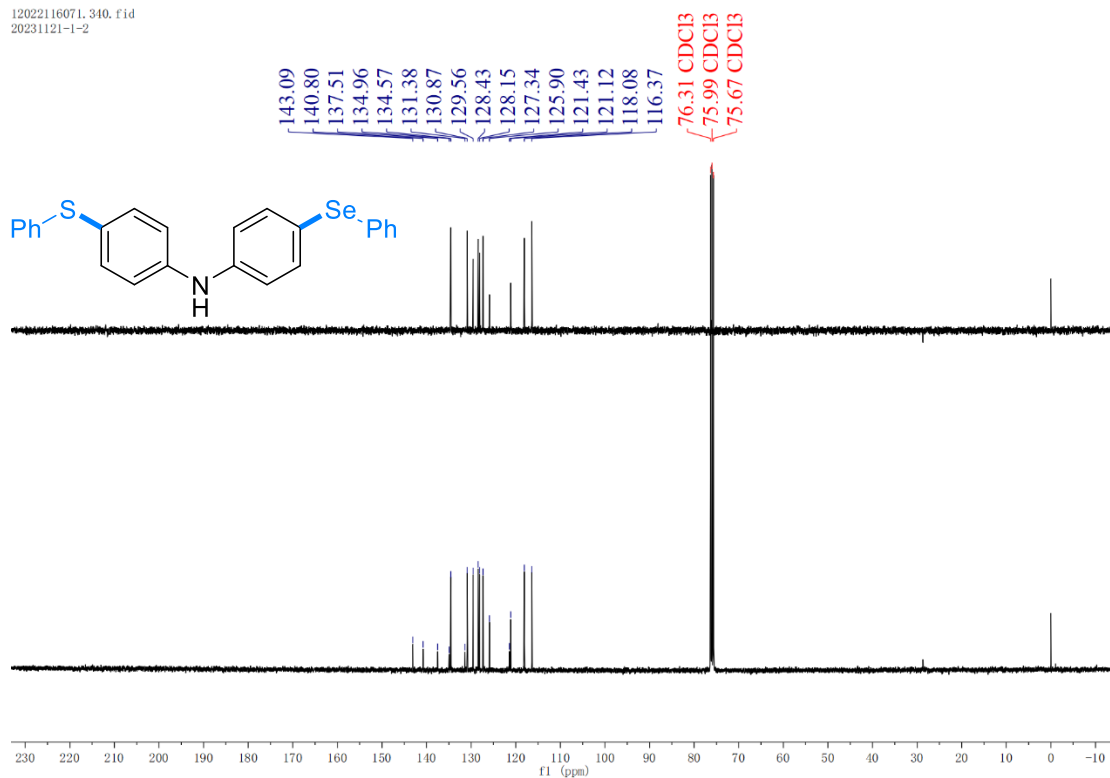

### <sup>13</sup>C-NMR (100 MHz, CDCl<sub>3</sub>) Spectra of compound 14

12022116071.349.fid  
20231204-1

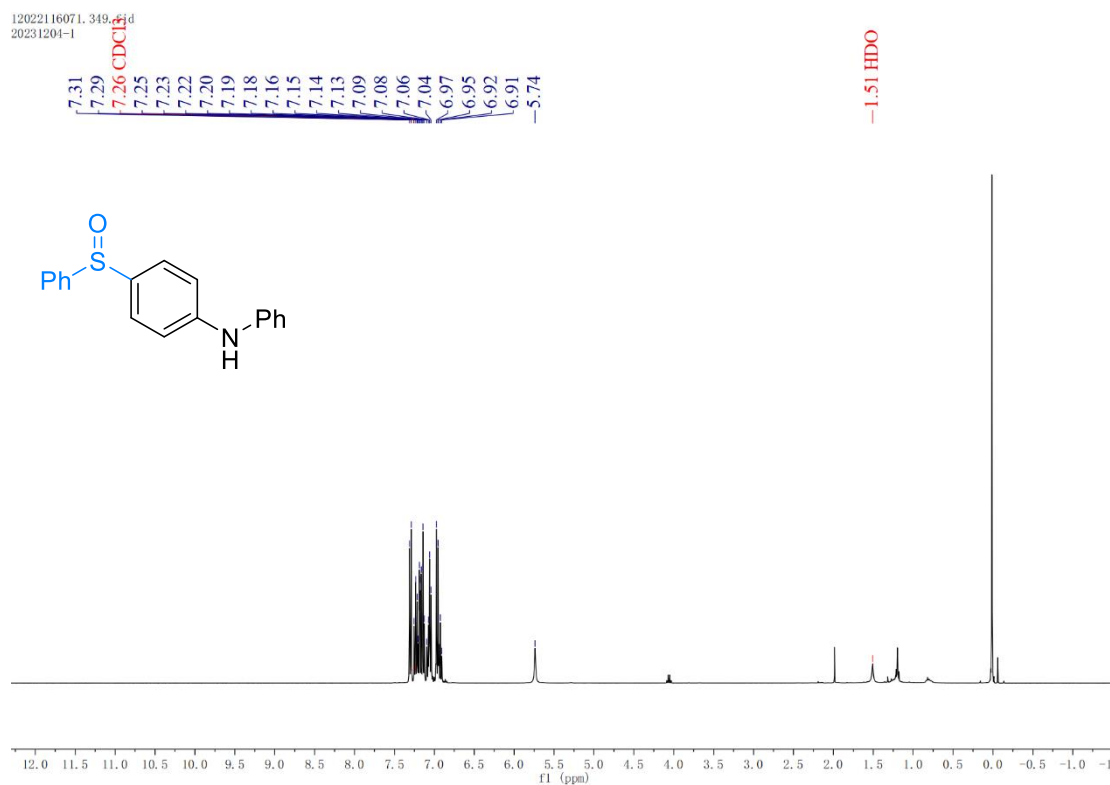

### <sup>1</sup>H-NMR (400 MHz, CDCl<sub>3</sub>) Spectra of compound 15

12022116071.350.fid  
20231204-1

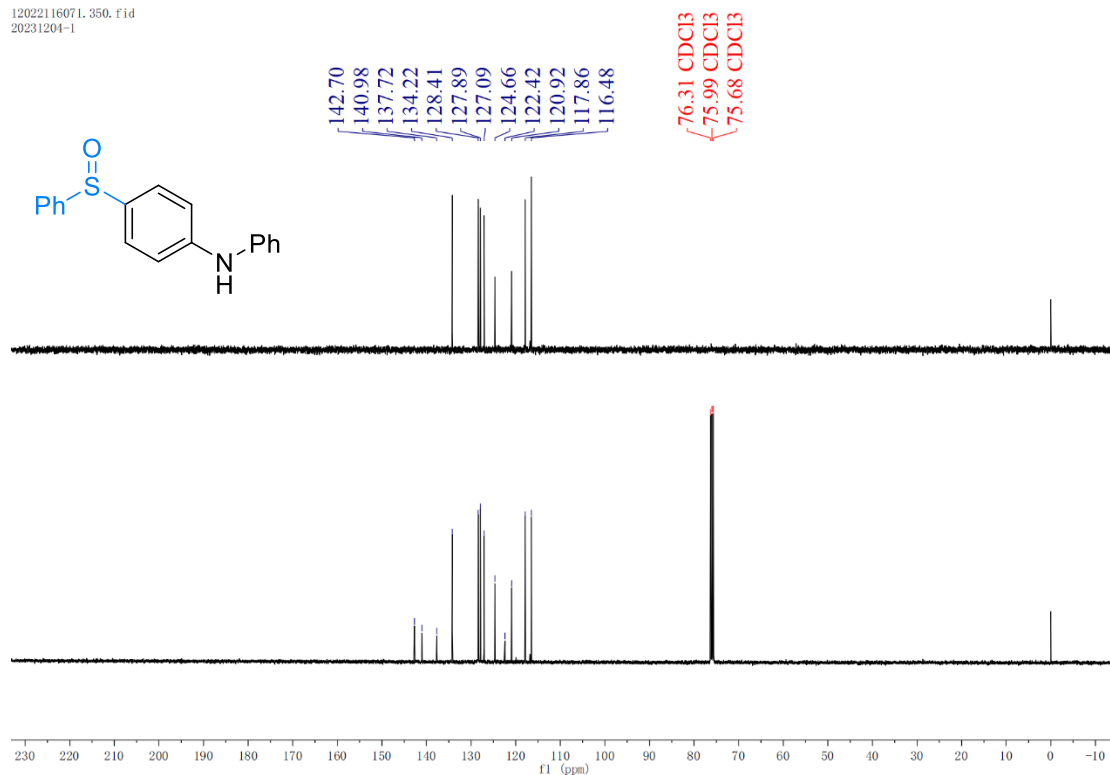

12022116071.178.fid  
20240627-1

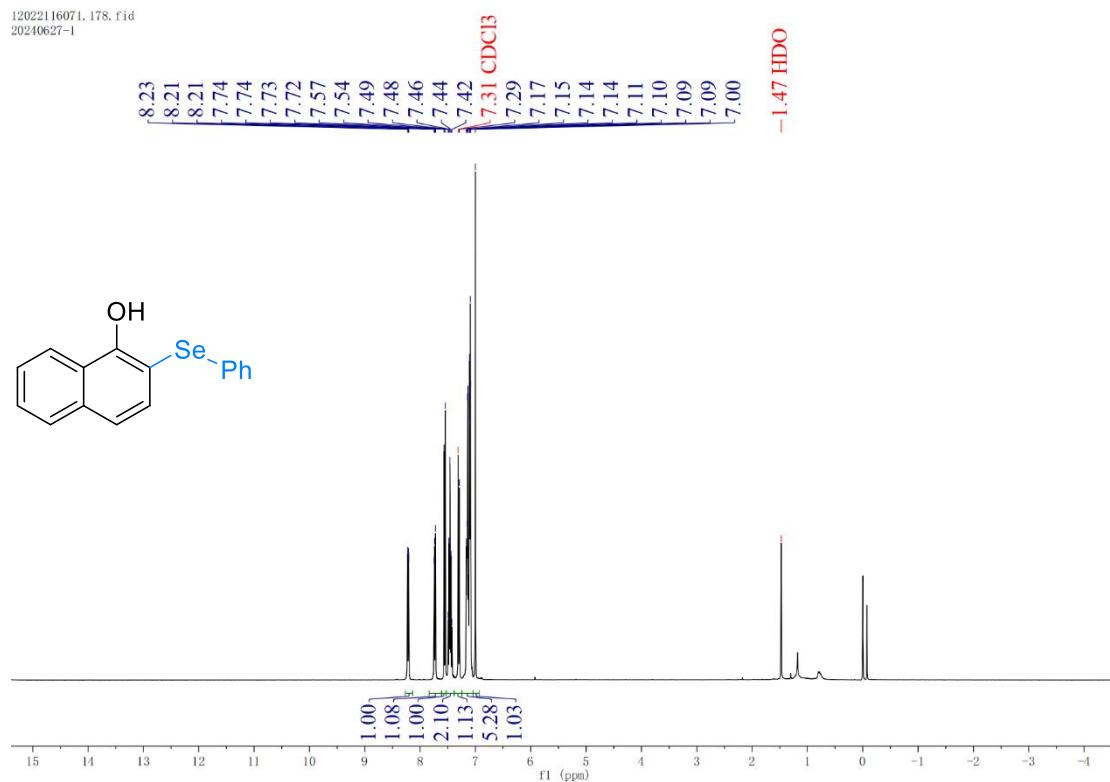

12022116071.516.fid  
20240627-1

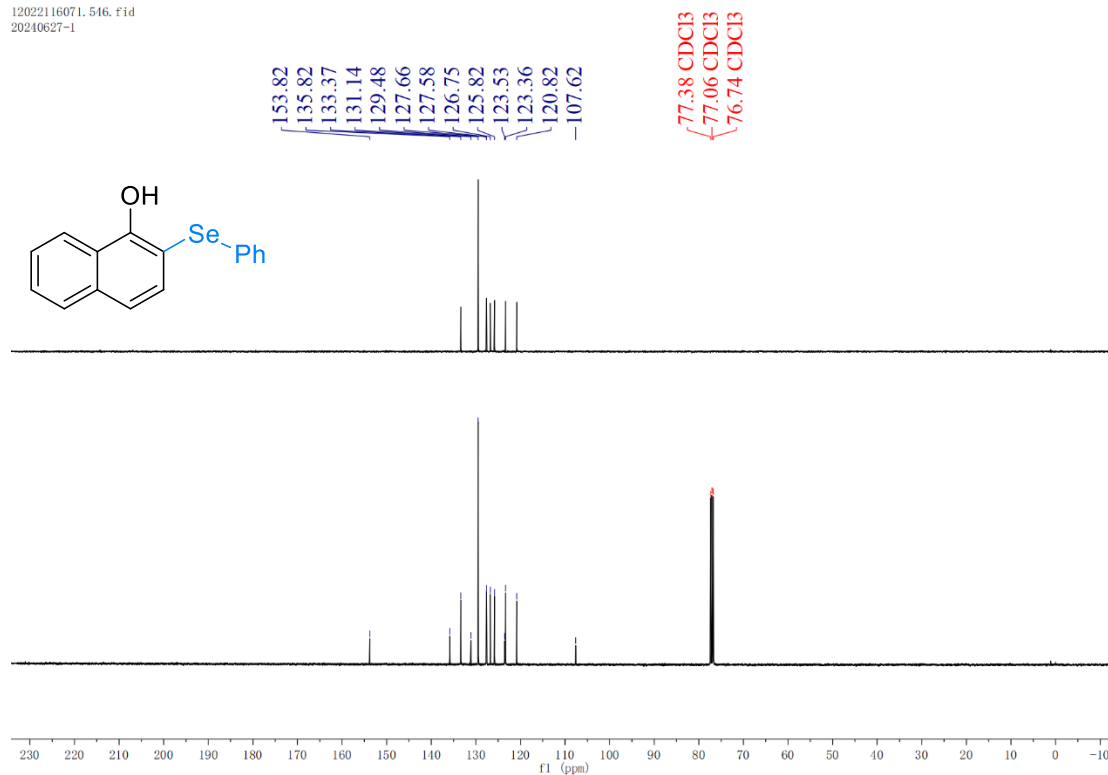

### <sup>13</sup>C-NMR (100 MHz, CDCl<sub>3</sub>) Spectra of compound 17

12022116071.276.fid  
20241220-2

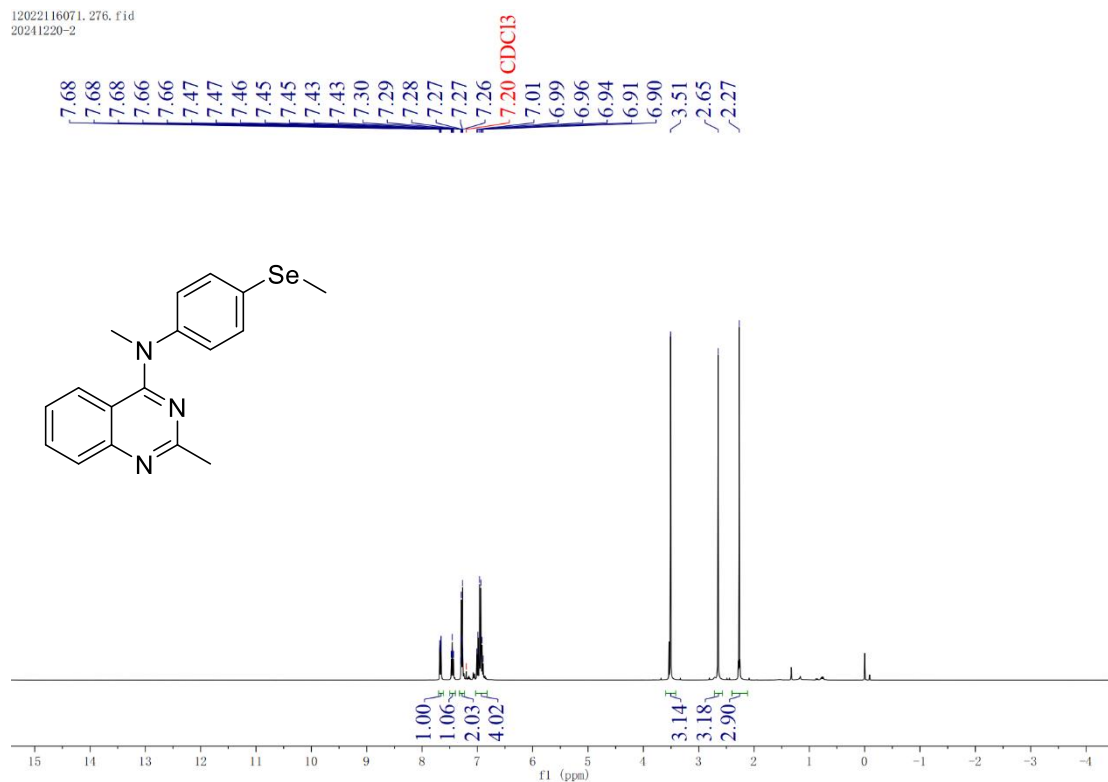

### <sup>1</sup>H-NMR (400 MHz, CDCl<sub>3</sub>) Spectra of compound 19



12022116071.277.fid  
20241220-2

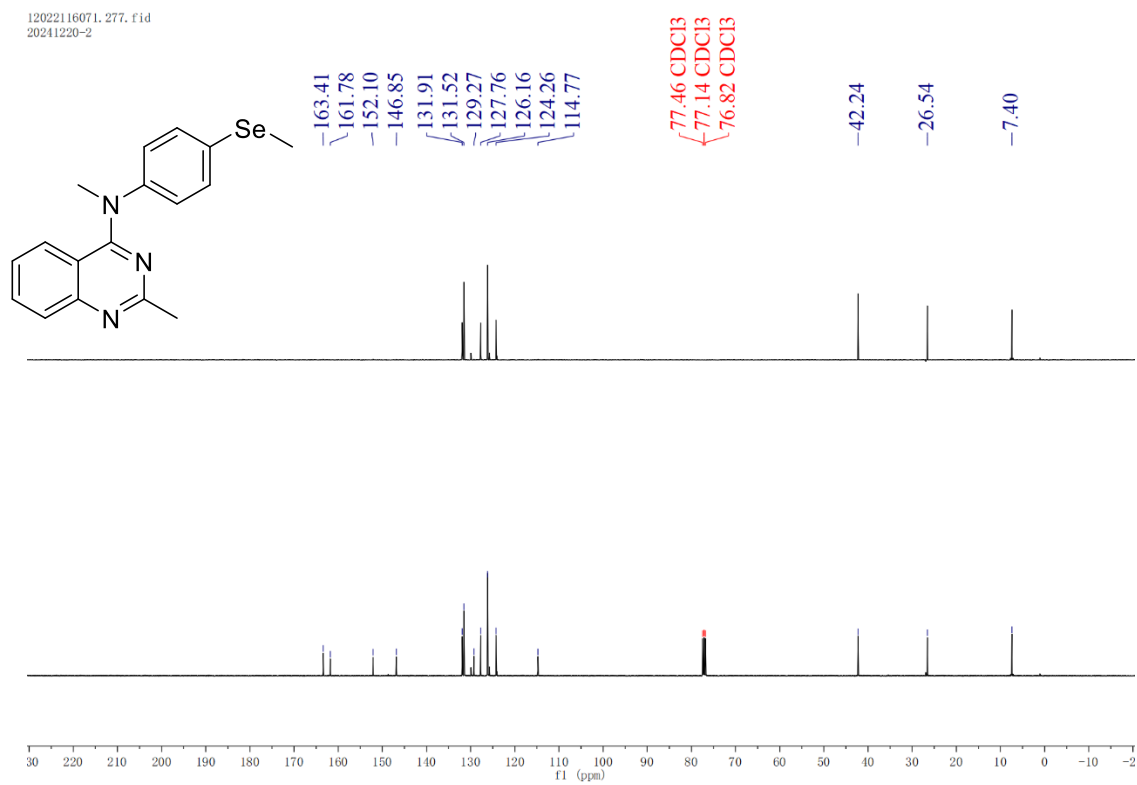

$^{13}\text{C-NMR}$  (100 MHz,  $\text{CDCl}_3$ ) Spectra of compound 19

## 8. References

- 1) Wang S , Yao L , Ying J ,et al. Palladium-catalyzed carbonylation of iminoquinones and aryl iodides to access aryl p-amino benzoates[J]. *Org. Biomol. Chem.*, **2021**, 19, 8246–8249.
- 2) Kumar P P, Reddy Y D, Reddy C V R, et al. Indium chloride: a versatile Lewis acid catalyst for the synthesis of 3-sulfenylindoles. *Sulfur Reports*. **2014**, 35, 356-361.
- 3) Jos é A. Fern ández-Salas, Alexander P. Pulis, David J. Procter. Metal-free C–H thioarylation of arenes using sulfoxides: A direct, general diaryl sulfide synthesis. *Chem Commun*. **2016**, 52, 12364—12367.
- 4) Zhang Q, Ban Y, Yuan P, et al. Visible-light-mediated aerobic selenation of (hetero)arenes with diselenides. *Green Chem*. **2017**, 19, 5559–5563.
- 5) Zhou Z, He X, et al. A simple method for the preparation of arylselenanyl anilines, Synthetic Communications. *Synthetic Communications*. **2018**, 19, 2553-2558,
- 6) Rafique J, Saba S, Franco M S, et al. Direct, Metal-free C(sp<sup>2</sup>)–H Chalcogenation of Indoles and Imidazopyridines with Dichalcogenides Catalysed by KIO<sub>3</sub> . *Chemistry A European Journal*, **2018**, 24, 4173 – 4180.
- 7) Zhengfen L, Yonggang J, Chunxiang L, et al. Metal-Free Synthesis of Phenol-Aryl Selenides via Dehydrogenative C–Se Coupling of Aryl Selenoxides with Phenols. *J. Org. Chem*. **2020**, 85, 7386–7398
- 8) An Baijiao, Wang Bo, Hu Jinhui, et al. Synthesis and Biological Evaluation of Selenium-Containing 4-Anilinoquinazoline Derivatives as Novel Antimitotic Agents. *J. Med. Chem*, **2018**, 61, 2571–2588.
